# Supplementary material for: Complete chloroplast genome sequences of five Bruguiera species (Rhizophoraceae): comparative analysis and phylogenetic relationships
Source: PeerJ journal article supplement (doi:10.7717/peerj.12268), 2021-10-22

**Figure S1** Analysis of PCR products by 1% agarose gel electrophoresis.

A gel purified PCR products of a primer pair, ndhF-F and rpl32-R (Table S2) in five *Bruguiera* chloroplasts.

Lane M1 and M2: DNA size marker, Lane 1: PCR product in *Bruguiera cylindrica* (1202 bp), Lane 2: PCR product in *B. gymnorhiza* (no product), Lane 3: PCR product in *B. hainesii* (1202 bp), Lane 4: PCR product in *B. parviflora* (1199 bp) and Lane 5: PCR product in *B. sexangula* (1169 bp).

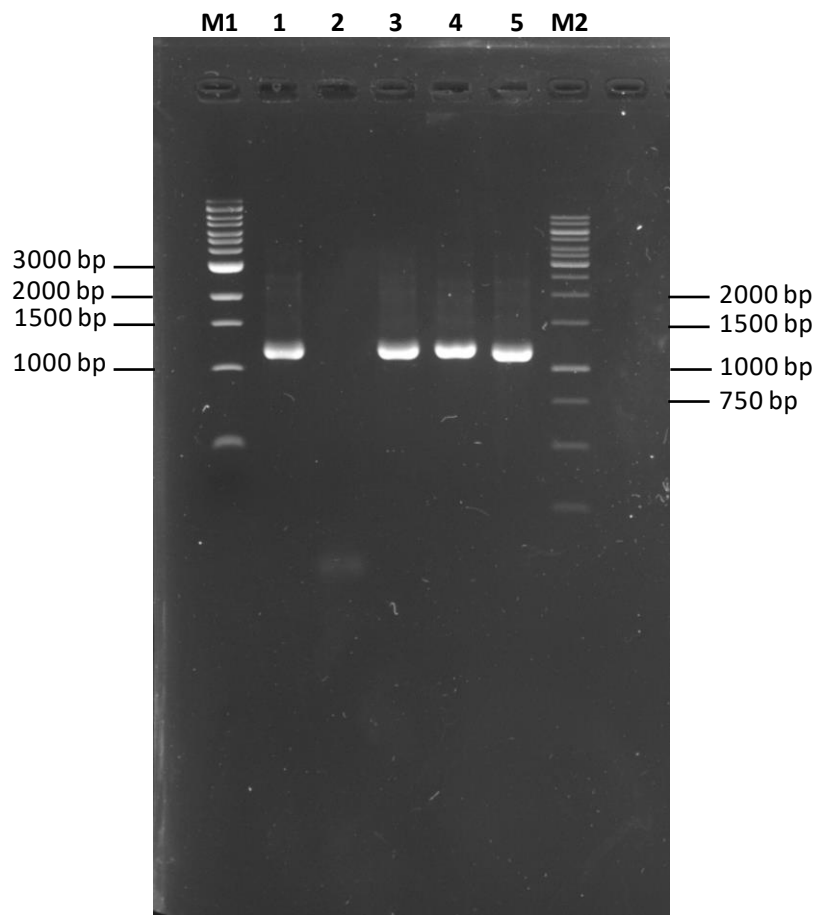

Supplement: Figure_S1.pdf [file Figure_S1.pdf]
