# Supplementary material for: Complete chloroplast genome sequences of five Bruguiera species (Rhizophoraceae): comparative analysis and phylogenetic relationships
Source: PeerJ journal article supplement (doi:10.7717/peerj.12268), 2021-10-22

**Figure S2** Analysis of SSR markers.

A set of 20 of SSR markers were used to estimate the genetic variation among five *Bruguiera* species. Y-axis is nucleotide size. A1-A5: SSR product of cpSSR1-F and cpSSR1-R primers (Table S3) in *Bruguiera cylindrica*, *B. gymnorhiza*, *B. hainesii*, *B. parviflora* and *B. sexangula*, respectively. A6-A10: SSR product of cpSSR2-F and cpSSR2-R primers in *B. cylindrica*, *B. gymnorhiza*, *B. hainesii*, *B. parviflora* and *B. sexangula*, respectively. A11-A15: SSR product of cpSSR3-F and cpSSR3-R primers in *B. cylindrica*, *B. gymnorhiza*, *B. hainesii*, *B. parviflora* and *B. sexangula*, respectively. A16-A20: SSR product of cpSSR4-F and cpSSR4-R primers in *B. cylindrica*, *B. gymnorhiza*, *B. hainesii*, *B. parviflora* and *B. sexangula*, respectively.

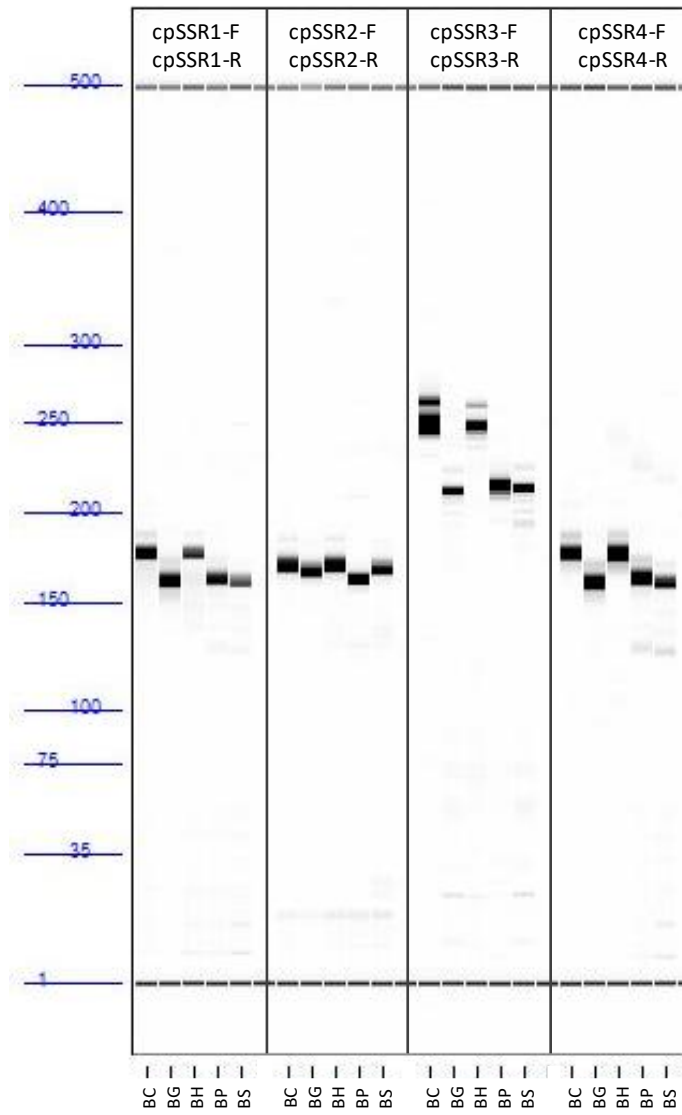

Supplement: Figure_S2.pdf [file Figure_S2.pdf]
