# Supplementary material for: Complete chloroplast genome sequences of five Bruguiera species (Rhizophoraceae): comparative analysis and phylogenetic relationships
Source: PeerJ. 2021 Oct 22;9:e12268. doi: 10.7717/peerj.12268 (PMC8544253; doi:10.7717/peerj.12268)
Supplement: Supplemental Information 1 [file peerj-09-12268-s001.xlsx]

## Sheet: TS1
Table S1. Sample location of five Brugueira species.
Species	Sample location
Bruguiera cylindrica (L.) Blume	Ngao Mangrove Forest Research Centre, Ranong, Thailand
Bruguiera gymnorhiza (L.) Savigny	Ngao Mangrove Forest Research Centre, Ranong, Thailand
Bruguiera hainesii C.G. Rogers	Ngao Mangrove Forest Research Centre, Ranong, Thailand
Bruguiera parviflora (Roxb.) Wight &Arn.exGriff	Ngao Mangrove Forest Research Centre, Ranong, Thailand
Bruguiera sexangula (Lour) Poir.	Mangrove Forest Development station 11 (Laun), Ranong, Thailand
