# Supplementary material for: Complete chloroplast genome sequences of five Bruguiera species (Rhizophoraceae): comparative analysis and phylogenetic relationships
Source: PeerJ. 2021 Oct 22;9:e12268. doi: 10.7717/peerj.12268 (PMC8544253; doi:10.7717/peerj.12268)
Supplement: Supplemental Information 2 [file peerj-09-12268-s002.xlsx]

## Sheet: TS2
Table S2. Sequences of a primer pair for testing rpl32 loss in five Bruguiera species.
Forward primer name	Forward primer	Reverse primer name	Reverse primer	Species	Estimated PCR size
ndhF-F	GTAGTCCCGCTCCTATTACC	rpl32-R	CCAATATCCCTTTCTTTTCCAA (edited the sequence position at 13, 14 from Shaw et al., 2007)	BC, BG, BH, BP, BS	1202, 0, 1202, 1199, 1169
Notes. BC, BG, BH, BP, and BS represent Bruguiera cylindrica, B. gymnorhiza, B. hainesii, B. parviflora, and B. sexangula, respectively.
