# Supplementary material for: Complete chloroplast genome sequences of five Bruguiera species (Rhizophoraceae): comparative analysis and phylogenetic relationships
Source: PeerJ. 2021 Oct 22;9:e12268. doi: 10.7717/peerj.12268 (PMC8544253; doi:10.7717/peerj.12268)
Supplement: Supplemental Information 3 [file peerj-09-12268-s003.xlsx]

## Sheet: TS3
Table S3. List of SSR primer pairs in five Bruguiera species.
Forward primer name	Forward primer	Reverse primer name	Reverse primer	Species	Estimated product size
cpSSR1-F	TCAAAATTGGAGAATCCAACG	cpSSR1-R	CGATATTCAAGGAGTGCGTTC	BC, BG, BH, BP, BS	167, 153, 167, 154, 152
cpSSR2-F	TTGATGCATACGGTTCAACA	cpSSR2-R	GCAAACGGGTCAAAACTCAT	BC, BG, BH, BP, BS	162, 159, 162, 157, 160
cpSSR3-F	ACCCCAGGGACATACCTTTA	cpSSR3-R	ACTAGTTCCGGGTTCGAGTC	BC, BG, BH, BP, BS	240, 202, 240, 206, 202
cpSSR4-F	CAAAATTGGAGAATCCAACGA	cpSSR4-R	CGATATTCAAGGAGTGCGTTC	BC, BG, BH, BP, BS	165, 151, 165, 152, 150
Notes. BC, BG, BH, BP, and BS represent Bruguiera cylindrica, B. gymnorhiza, B. hainesii, B. parviflora, and B. sexangula, respectively.
