# Supplementary material for: Complete chloroplast genome sequences of five Bruguiera species (Rhizophoraceae): comparative analysis and phylogenetic relationships
Source: PeerJ. 2021 Oct 22;9:e12268. doi: 10.7717/peerj.12268 (PMC8544253; doi:10.7717/peerj.12268)
Supplement: Supplemental Information 4 [file peerj-09-12268-s004.xlsx]

## Sheet: TS4
Table S4. List of chloroplast accession numbers and genes for phylogenetic analysis.
Species	Order	Family	Accession number (NCBI)	Genome length (bp)	accD	atpA	atpB	atpE	atpF	atpH	atpI	ccsA	cemA	clpP	matK	ndhA	ndhB	ndhC	ndhD	ndhE	ndhF	ndhG	ndhH	ndhI	ndhJ	ndhK	petA	petB	petD	petG	petL	petN	psaA	psaB	psaC	psaI	psaJ	psbA	psbB	psbC	psbD	psbE	psbF	psbH	psbI	psbJ	psbK	psbL	psbM
Garcinia mangostana	Malpighiales	Clusiaceae	NC_036341	158179	√	√	√	√	√	√	√	√	√	√	√	√	√	√	√	√	√	√	√	√	√	√	√	√	√	√	√	√	√	√	√	√	√	√	√	√	√	√	√	√	√	√	√	√	√
Ctenolophon englerianus	Malpighiales	Ctenolophonaceae	NC_049158	161553	√	√	√	√	√	√	√	√	√	√	√	√	√	√	√	√	√	√	√	√	√	√	√	√	√	√	√	√	√	√	√	√	√	√	√	√	√	√	√	√	√	√	√	√	√
Erythroxylum novogranatense	Malpighiales	Erythroxylaceae	NC_030601	163937	√	√	√	√	√	√	√	√	√	√	√	√	√	√	√	√	√	√	√	√	√	√	√	√	√	√	√	√	√	√	√	√	√	√	-	√	√	√	√	√	√	√	√	√	√
Hevea brasiliensis	Malpighiales	Euphorbiaceae	NC_015308	161191	√	√	√	√	√	√	√	√	√	√	√	√	√	√	√	√	√	√	√	√	√	√	√	√	√	√	√	√	√	√	√	√	√	√	√	√	√	√	√	√	√	√	√	√	√
Ricinus communis	Malpighiales	Euphorbiaceae	NC_016736	163161	√	√	√	√	√	√	√	√	√	√	√	√	√	√	√	√	√	√	√	√	√	√	√	√	√	√	√	√	√	√	√	√	√	√	√	√	√	√	√	√	√	√	√	√	√
Vernicia fordii	Malpighiales	Euphorbiaceae	NC_034803	161528	√	√	√	√	√	√	√	√	√	√	√	√	√	√	√	√	√	√	√	√	√	√	√	√	√	√	√	√	√	√	√	√	√	√	√	√	√	√	√	√	√	√	√	√	√
Euphorbia_lathyris	Malpighiales	Euphorbiaceae	NC_052746	161453	√	√	√	√	√	√	√	√	√	√	√	√	√	√	√	√	√	√	√	√	√	√	√	√	√	√	√	√	√	√	√	√	√	√	√	√	√	√	√	√	√	√	√	√	√
Jatropha_curcas	Malpighiales	Euphorbiaceae	NC_012224	163856	√	√	√	√	√	√	√	√	√	√	√	√	√	√	√	√	√	√	√	√	√	√	√	√	√	√	√	√	√	√	√	√	√	√	√	√	√	√	√	√	√	√	√	√	√
Manihot esculenta	Malpighiales	Euphorbiaceae	NC_010433	161453	√	√	√	√	√	√	√	√	√	√	√	√	√	√	√	√	√	√	√	√	√	√	√	√	√	√	√	√	√	√	√	√	√	√	√	√	√	√	√	√	√	√	√	√	√
Euphorbia esula	Malpighiales	Euphorbiaceae	NC_033910	160512	√	√	√	√	√	√	√	√	√	√	√	√	√	-	√	√	√	√	√	√	√	√	√	√	√	√	√	√	√	√	√	√	√	√	√	√	√	√	√	√	√	√	√	√	√
Euphorbia kansui	Malpighiales	Euphorbiaceae	MH392274	161061	√	√	√	√	√	√	√	√	√	√	√	√	√	-	√	√	√	√	√	√	√	√	√	√	√	√	√	√	√	√	√	√	√	√	√	√	√	√	√	√	√	√	√	√	√
Euphorbia larica	Malpighiales	Euphorbiaceae	MN646683	162358	√	√	√	√	√	√	√	√	√	√	√	√	√	√	√	√	√	√	√	√	√	√	√	√	√	√	√	√	√	√	√	√	√	√	√	√	√	√	√	√	√	√	√	√	√
Euphorbia smithii	Malpighiales	Euphorbiaceae	MN646684	162172	√	√	√	√	√	√	√	√	√	√	√	√	√	√	√	√	√	√	√	√	√	√	√	√	√	√	√	√	√	√	√	√	√	√	√	√	√	√	√	√	√	√	√	√	√
Euphorbia tirucalli	Malpighiales	Euphorbiaceae	NC_042193	163091	√	√	√	√	√	√	√	√	√	√	√	√	Ѱ	√	√	√	√	√	√	√	√	√	√	√	√	√	√	√	√	√	√	√	√	√	√	√	√	√	√	√	√	√	√	√	√
Byrsonima coccolobifolia	Malpighiales	Malpighiaceae	NC_037191	160329	√	√	√	√	√	√	√	√	√	√	√	√	√	√	√	√	√	√	√	√	√	√	√	√	√	√	√	√	√	√	√	√	√	√	√	√	√	√	√	√	√	√	√	√	√
Byrsonima crassifolia	Malpighiales	Malpighiaceae	NC_037192	160212	√	√	√	√	√	√	√	√	√	√	√	√	√	√	√	√	√	√	√	√	√	√	√	√	√	√	√	√	√	√	√	√	√	√	√	√	√	√	√	√	√	√	√	√	√
Banisteriopsis caapi	Malpighiales	Malpighiaceae	NC_037945	158473	√	√	√	√	√	√	√	√	√	√	√	√	√	√	√	√	√	√	√	√	√	√	√	√	√	√	√	√	√	√	√	√	√	√	√	√	√	√	√	√	√	√	√	√	√
Aspidopterys obcordata	Malpighiales	Malpighiaceae	NC_049898	160453	√	√	√	√	√	√	√	√	√	√	√	√	√	√	√	√	√	√	√	√	√	√	√	√	√	√	√	√	√	√	√	√	√	√	√	√	√	√	√	√	√	√	√	√	√
Passiflora edulis	Malpighiales	Passifloraceae	NC_034285	151406	Ѱ	√	√	√	√	√	√	√	√	√	√	√	√	√	√	√	√	√	√	√	√	√	√	√	√	√	√	√	√	√	√	√	√	√	√	√	√	√	√	√	√	√	√	√	√
Passiflora cincinnata	Malpighiales	Passifloraceae	NC_037690	150783	√	√	√	√	√	√	√	√	√	√	√	√	√	√	√	√	√	√	√	√	√	√	√	√	√	√	√	√	√	√	√	√	√	√	√	√	√	√	√	√	√	√	√	√	√
Passiflora contracta	Malpighiales	Passifloraceae	NC_043818	166766	Ѱ	√	√	√	√	√	√	√	√	√	√	√	√	√	√	√	√	√	√	√	√	√	√	√	√	√	√	√	√	√	√	√	√	√	√	√	√	√	√	√	√	√	√	√	√
Passiflora pittieri	Malpighiales	Passifloraceae	NC_038125	161494	√	√	√	√	√	√	√	√	√	√	√	√	√	√	√	√	√	√	√	√	√	√	√	√	√	√	√	√	√	√	√	√	√	√	√	√	√	√	√	√	√	√	√	√	√
Bruguiera cylindrica	Malpighiales	Rhizophoraceae	MW836110 (in this study)	164297	√	√	√	√	√	√	√	√	√	√	√	√	√	√	√	√	√	√	√	√	√	√	√	√	√	√	√	√	√	√	√	√	√	√	√	√	√	√	√	√	√	√	√	√	√
Bruguiera gymnorrhiza	Malpighiales	Rhizophoraceae	MW836111 (in this study)	161195	√	√	√	√	√	√	√	√	√	√	√	√	√	√	√	√	√	√	√	√	√	√	√	√	√	√	√	√	√	√	√	√	√	√	√	√	√	√	√	√	√	√	√	√	√
Bruguiera hainesii	Malpighiales	Rhizophoraceae	MW836112 (in this study)	164295	√	√	√	√	√	√	√	√	√	√	√	√	√	√	√	√	√	√	√	√	√	√	√	√	√	√	√	√	√	√	√	√	√	√	√	√	√	√	√	√	√	√	√	√	√
Bruguiera parviflora	Malpighiales	Rhizophoraceae	MW836113 (in this study)	163228	√	√	√	√	√	√	√	√	√	√	√	√	√	√	√	√	√	√	√	√	√	√	√	√	√	√	√	√	√	√	√	√	√	√	√	√	√	√	√	√	√	√	√	√	√
Bruguiera sexangula	Malpighiales	Rhizophoraceae	MW836114 (in this study)	164170	√	√	√	√	√	√	√	√	√	√	√	√	√	√	√	√	√	√	√	√	√	√	√	√	√	√	√	√	√	√	√	√	√	√	√	√	√	√	√	√	√	√	√	√	√
Kandelia obavata	Malpighiales	Rhizophoraceae	NC_042718	160325	√	√	√	√	√	√	√	√	√	√	√	√	√	√	√	√	-	√	√	√	√	√	√	√	√	√	√	√	√	√	√	√	√	√	√	√	√	√	√	√	-	√	-	√	√
Pellacalyx yunnanensis	Malpighiales	Rhizophoraceae	NC_048998	163743	√	√	√	√	√	√	√	√	√	√	√	√	√	√	√	√	√	√	√	√	√	√	√	√	√	√	√	√	√	√	√	√	√	√	√	√	√	√	√	√	√	√	√	√	√
Rhizophora stylosa	Malpighiales	Rhizophoraceae	NC_042819	164475	√	√	√	√	√	√	√	√	√	√	√	√	√	√	√	√	√	√	√	√	√	√	√	√	√	√	√	√	√	√	√	√	√	√	√	√	√	√	√	√	√	√	√	√	√
Rhizosphora x lamarckii	Malpighiales	Rhizophoraceae	NC_046517	164325	√	√	√	√	√	√	√	√	√	√	√	√	√	√	√	√	√	√	√	√	√	√	√	√	√	√	√	√	√	√	√	√	√	√	√	√	√	√	√	√	√	√	√	√	√
Salix interior	Malpighiales	Salicaceae	NC_024681	156620	√	√	√	√	√	√	√	√	√	√	√	√	√	√	√	√	√	√	√	√	√	√	√	√	√	√	√	√	√	√	√	√	√	√	√	√	√	√	√	√	√	√	√	√	√
Flacourtia indica	Malpighiales	Salicaceae	NC_037410	156542	√	√	√	√	√	√	√	√	√	√	√	√	√	√	√	√	√	√	√	√	√	√	√	√	√	√	√	√	√	√	√	√	√	√	√	√	√	√	√	√	√	√	√	√	√
Itoa orientalis	Malpighiales	Salicaceae	NC_037411	156682	√	√	√	√	√	√	√	√	√	√	√	√	√	√	√	√	√	√	√	√	√	√	√	√	√	√	√	√	√	√	√	√	√	√	√	√	√	√	√	√	√	√	√	√	√
Poliothyrsis sinensis	Malpighiales	Salicaceae	NC_037412	156680	√	√	√	√	√	√	√	√	√	√	√	√	√	√	√	√	√	√	√	√	√	√	√	√	√	√	√	√	√	√	√	√	√	√	√	√	√	√	√	√	√	√	√	√	√
Salix magnifica	Malpighiales	Salicaceae	NC_037424	154977	√	√	√	√	√	√	√	√	√	√	√	√	√	√	√	√	√	√	√	√	√	√	√	-	√	√	√	√	√	√	√	√	√	√	√	√	√	-	√	√	√	√	√	√	√
Populus alba	Malpighiales	Salicaceae	NC_008235	156505	√	√	√	√	√	√	√	√	√	√	√	√	√	√	√	√	√	√	√	√	√	√	√	√	√	√	√	√	√	√	√	√	√	√	√	√	√	√	√	√	√	√	√	√	√
Viola mirabilis	Malpighiales	Violaceae	NC_041582	158162	√	√	√	√	√	√	√	√	√	√	√	√	√	√	√	√	√	√	√	√	√	√	√	√	√	√	√	√	√	√	√	√	√	√	√	√	√	√	√	√	√	√	√	√	√
Viola seoulensis	Malpighiales	Violaceae	NC_026986	156507	√	√	√	√	√	√	√	√	√	√	√	√	√	√	√	√	√	√	√	√	√	√	√	√	√	√	√	√	√	√	√	√	√	√	√	√	√	√	√	√	√	√	√	√	√
Averrhoa carambola	Oxalidales	Oxalidaceae	NC_033350	155965	√	√	√	√	√	√	√	√	√	√	√	√	√	√	√	√	√	√	√	√	√	√	√	√	√	√	√	√	√	√	√	√	√	√	√	√	√	√	√	√	√	√	√	√	√
Notes. Genes used for phylogenetic analysis were highlighted.
[truncated: 32 more columns]
