# Supplementary material for: Complete chloroplast genome sequences of five Bruguiera species (Rhizophoraceae): comparative analysis and phylogenetic relationships
Source: PeerJ. 2021 Oct 22;9:e12268. doi: 10.7717/peerj.12268 (PMC8544253; doi:10.7717/peerj.12268)
Supplement: Supplemental Information 5 [file peerj-09-12268-s005.xlsx]

## Sheet: TS5
Table S5. List of chloroplast accession numbers and genes for gene selective pressure analysis.
						1	2	3	4	5	6	7	8	9	10	11	12	13	14	15	16	17	18	19	20	21	22	23	24	25	26	27	28	29	30	31	32	33	34		35	36	37	38	39	40	41	42	43
Species	Species short name	Order	Family	Accession number (NCBI)	Genome length (bp)	accD	atpA	atpB	atpE	atpF	atpH	atpI	ccsA	cemA	clpP	matK	ndhA	ndhB	ndhC	ndhD	ndhE	ndhF	ndhG	ndhH	ndhI	ndhJ	ndhK	petA	petB	petD	petG	petL	petN	psaA	psaB	psaC	psaI	psaJ	psbA	psbB	psbC	psbD	psbE	psbF	psbH	psbI	psbJ	psbK	psbL
Bruguiera cylindrica	BC	Malpighiales	Rhizophoraceae	MW836110 (in this study)	164297	√	√	√	√	√	√	√	√	√	√	√	√	√	√	√	√	√	√	√	√	√	√	√	√	√	√	√	√	√	√	√	√	√	√	√	√	√	√	√	√	√	√	√	√
Bruguiera gymnorrhiza	BG	Malpighiales	Rhizophoraceae	MW836111 (in this study)	161195	√	√	√	√	√	√	√	√	√	√	√	√	√	√	√	√	√	√	√	√	√	√	√	√	√	√	√	√	√	√	√	√	√	√	√	√	√	√	√	√	√	√	√	√
Bruguiera hainesii	BH	Malpighiales	Rhizophoraceae	MW836112 (in this study)	164295	√	√	√	√	√	√	√	√	√	√	√	√	√	√	√	√	√	√	√	√	√	√	√	√	√	√	√	√	√	√	√	√	√	√	√	√	√	√	√	√	√	√	√	√
Bruguiera parviflora	BP	Malpighiales	Rhizophoraceae	MW836113 (in this study)	163228	√	√	√	√	√	√	√	√	√	√	√	√	√	√	√	√	√	√	√	√	√	√	√	√	√	√	√	√	√	√	√	√	√	√	√	√	√	√	√	√	√	√	√	√
Bruguiera sexangula	BS	Malpighiales	Rhizophoraceae	MW836114 (in this study)	164170	√	√	√	√	√	√	√	√	√	√	√	√	√	√	√	√	√	√	√	√	√	√	√	√	√	√	√	√	√	√	√	√	√	√	√	√	√	√	√	√	√	√	√	√
Ctenolophon englerianus	CE	Malpighiales	Ctenolophonaceae	NC_049158	161553	√	√	√	√	√	√	√	√	√	√	√	√	√	√	√	√	√	√	√	√	√	√	√	√	√	√	√	√	√	√	√	√	√	√	√	√	√	√	√	√	√	√	√	√
Erythroxylum novogranatense	EN	Malpighiales	Erythroxylaceae	NC_030601	163937	√	√	√	√	√	√	√	√	√	√	√	√	√	√	√	√	√	√	√	√	√	√	√	√	√	√	√	√	√	√	√	√	√	√	-	√	√	√	√	√	√	√	√	√
Averrhoa carambola	AC	Oxalidales	Oxalidaceae	NC_033350	155965	√	√	√	√	√	√	√	√	√	√	√	√	√	√	√	√	√	√	√	√	√	√	√	√	√	√	√	√	√	√	√	√	√	√	√	√	√	√	√	√	√	√	√	√
Vitis rotundifolia	VR	Vitales	Vitaceae	NC_023790	160891	√	√	√	√	√	√	√	√	√	√	√	√	√	√	√	√	√	√	√	√	√	√	√	√	√	√	√	√	√	√	√	√	√	√	√	√	√	√	√	√	√	√	√	√
Notes. Genes used for gene selective analysis were highlighted.
[truncated: 33 more columns]
