# Supplementary material for: Complete chloroplast genome sequences of five Bruguiera species (Rhizophoraceae): comparative analysis and phylogenetic relationships
Source: PeerJ. 2021 Oct 22;9:e12268. doi: 10.7717/peerj.12268 (PMC8544253; doi:10.7717/peerj.12268)
Supplement: Supplemental Information 6 [file peerj-09-12268-s006.xlsx]

## Sheet: TS6
Table S6. The read coverage of the rpl32 gene in five Bruguiera species.
The nucleotide position of rpl32	Read coverage
	BG	BC	BH	BP	BS
1	89	8000	8000	8000	8000
2	91	8001	8001	8001	8001
3	93	8002	8002	8002	8002
4	94	8003	8003	8003	8003
5	95	8004	8004	8004	8004
6	96	8005	8005	8005	8005
7	97	8006	8006	8006	8006
8	98	8007	8007	8007	8007
9	100	8008	8008	8008	8008
10	100	8009	8009	8009	8009
11	100	8010	8010	8010	8010
12	103	7978	7977	7966	7970
13	104	8010	8008	8009	8008
14	104	8013	8012	8013	8012
15	105	8014	8014	8014	8014
16	107	8015	8015	8015	8015
17	109	8016	8016	8016	8016
18	110	8017	8017	8017	8017
19	110	8018	8018	8018	8018
20	111	7994	7917	8011	7917
21	112	7971	7908	7999	7908
22	112	7989	7969	7997	7969
23	112	7973	7932	7999	7932
24	113	7987	7952	7982	7952
25	114	7978	7932	7987	7932
26	117	7982	7949	7993	7940
27	119	7979	7958	7983	7955
28	119	7993	7956	7985	7951
29	119	7980	7945	7996	7940
30	121	7987	7921	7979	7918
31	126	7937	7960	7957	7955
32	126	7950	7945	7932	7940
33	127	7951	7933	7927	7930
34	125	7855	7865	7876	7860
35	124	7787	7859	7867	7855
36	124	7751	7889	7888	7889
37	126	7746	7876	7904	7872
38	127	7924	7943	7964	7940
39	126	7964	7960	7951	7956
40	128	7901	7934	7950	7930
41	131	7963	7959	7970	7956
42	133	7953	7955	7953	7950
43	134	7947	7963	7971	7960
44	133	7958	7950	7933	7943
45	133	7966	7973	7940	7970
46	131	7929	7951	7837	7951
47	129	7926	7957	7816	7957
48	129	7861	7848	7765	7848
49	129	7807	7838	7801	7838
50	129	7676	7678	7836	7678
51	125	7614	7647	7818	7647
52	123	7608	7678	7833	7640
53	124	7651	7736	7870	7734
54	124	7652	7720	7923	7715
55	124	7835	7957	7947	7950
56	122	7910	7930	7951	7925
57	123	7950	7939	7971	7930
58	123	7902	7894	7970	7891
59	122	7966	7966	7913	7966
60	119	7937	7953	7959	7952
61	118	7884	7887	7933	7885
62	118	7924	7951	7943	7953
63	115	7929	7907	7870	7905
64	113	7917	7920	7911	7922
65	113	7817	7844	7848	7843
66	113	7864	7924	7886	7922
67	113	7919	7927	7898	7926
68	115	7944	7913	7940	7916
69	116	7967	7952	7874	7954
70	115	7917	7889	7878	7888
71	116	7866	7855	7929	7853
72	116	7878	7901	7818	7903
73	116	7891	7894	7880	7891
74	117	7831	7838	7913	7836
75	116	7873	7878	7922	7876
76	116	7927	7945	7963	7946
77	116	7928	7933	7925	7939
78	115	7914	7932	7952	7930
79	113	7954	7957	7945	7955
80	112	7952	7966	7964	7967
81	111	7946	7971	7955	7973
82	110	7961	7980	7959	7982
83	110	7960	7963	7928	7961
84	110	7925	7921	7951	7924
85	111	7895	7876	7870	7874
86	109	7869	7879	7864	7879
87	109	7887	7860	7876	7860
88	105	7872	7838	7817	7838
89	105	7835	7833	7844	7833
90	104	7804	7818	7782	7818
91	104	7768	7822	7707	7822
92	105	7806	7831	7737	7831
93	105	7865	7899	7757	7899
94	103	7938	7938	7939	7938
95	102	7911	7898	7897	7898
96	101	7942	7935	7906	7935
97	102	7931	7943	7919	7943
98	101	7888	7871	7873	7871
99	101	7981	7975	7983	7975
100	101	7957	7963	7963	7963
101	102	7981	7980	7975	7980
102	101	7924	7950	7924	7950
103	101	7989	7979	7914	7979
104	100	7958	7955	7910	7955
105	100	7938	7966	7955	7966
106	99	7900	7934	7947	7934
107	98	7938	7942	7937	7942
108	97	7950	7929	7948	7929
109	97	7941	7922	7956	7922
110	98	7958	7946	7958	7946
111	98	7948	7940	7934	7940
112	98	7935	7909	7873	7909
113	97	7920	7899	7742	7899
114	98	7949	7942	7799	7942
115	98	7949	7942	7896	7942
116	97	7937	7927	7956	7927
117	97	7958	7959	7951	7959
118	98	7908	7915	7916	7915
119	98	7925	7900	7859	7900
120	97	7964	7957	7980	7957
121	95	7918	7942	7940	7942
122	95	7919	7970	7956	7970
123	94	7957	7951	7956	7951
124	95	7933	7964	7965	7964
125	95	7953	7952	7926	7952
126	94	7957	7946	7961	7946
127	96	7961	7949	7942	7949
128	97	7951	7962	7894	7962
129	98	7931	7945	7908	7945
130	97	7961	7966	7947	7966
131	103	7924	7922	7982	7922
132	103	7894	7907	7970	7907
133	102	7934	7937	7904	7937
134	101	7958	7958	7941	7958
135	100	7928	7923	7892	7923
136	100	7950	7923	7957	7923
137	101	7980	7975	7986	7975
138	101	7984	7981	7993	7981
139	100	7958	7948	7961	7948
140	99	7939	7917	7923	7917
141	98	7952	7954	7959	7954
142	99	7895	7896	7896	7896
143	97	7827	7815	7885	7815
144	95	7880	7884	7971	7884
145	95	7937	7951	7976	7951
146	94	7924	7964	7958	7964
147	94	7900	7960	7939	7962
148	94	7903	7967	7918	7967
149	94	7878	7961	7908	7961
150	93	7858	7962	7908	7962
151	93	7804	7954	7864	7951
152	91	7784	7924	7850	7924
153	90	7770	7923	7812	7923
154	87	7739	7904	7804	7908
155	86	7731	7892	7789	7892
156	82	7699	7853	7757	7853
157	81	7670	7807	7743	7807
158	81	7618	7748	7706	7748
159	81	7558	7681	7668	7681
160	79	7540	7659	7645	7659
161	79	7523	7626	7608	7625
162	78	7503	7611	7575	7611
163	77	7476	7581	7543	7581
164	76	7416	7522	7509	7522
165	74	7308	7432	7420	7432
166	70	7192	7335	7336	7335
167	67	7100	7268	7285	7266
168	64	7038	7224	7227	7224
169	63	6960	7169	7174	7167
170	61	6895	7103	7130	7103
171	61	6832	7006	7035	7008
172	61	6777	6937	6960	6937
173	60	6727	6894	6914	6891
174	60	6674	6858	6855	6852
Notes. BC, BG, BH, BP, and BS represent Bruguiera cylindrica, B. gymnorhiza, B. hainesii, B. parviflora, and B. sexangula, respectively.
