# Supplementary material for: Complete chloroplast genome sequences of five Bruguiera species (Rhizophoraceae): comparative analysis and phylogenetic relationships
Source: PeerJ. 2021 Oct 22;9:e12268. doi: 10.7717/peerj.12268 (PMC8544253; doi:10.7717/peerj.12268)
Supplement: Supplemental Information 7 [file peerj-09-12268-s007.xlsx]

## Sheet: TS7
Table S7. The chloroplast genes with exons and introns in five Brugueira species.
Gene	Species	Exon I (bp)	Intron 1 (bp)	Exon II (bp)	Intron II (bp)	Exon III (bp)
atpF	BC	145	732	410	-	-
	BG	145	736	410	-	-
	BH	145	732	410	-	-
	BP	145	736	410	-	-
	BS	145	744	410	-	-
ndhA	BC	583	1105	539	-	-
	BG	583	1098	539	-	-
	BH	583	1105	539	-	-
	BP	583	1076	539	-	-
	BS	583	1094	539	-	-
ndhB	BC	777	682	756	-	-
	BG	777	682	756	-	-
	BH	777	682	756	-	-
	BP	777	682	756	-	-
	BS	777	682	756	-	-
petB	BC	6	864	642	-	-
	BG	6	846	642	-	-
	BH	6	864	642	-	-
	BP	6	864	642	-	-
	BS	6	846	642	-	-
petD	BC	8	855	475	-	-
	BG	8	855	475	-	-
	BH	8	907	475	-	-
	BP	8	848	475	-	-
	BS	8	855	475	-	-
rpl2	BC	400	661	434	-	-
	BG	400	661	434	-	-
	BH	400	661	434	-	-
	BP	400	661	434	-	-
	BS	400	661	434	-	-
rpl16	BC	9	1156	399	-	-
	BG	9	1197	399	-	-
	BH	9	1156	399	-	-
	BP	9	1136	399	-	-
	BS	9	1171	399	-	-
rpoC1	BC	432	769	1641	-	-
	BG	432	765	1641	-	-
	BH	432	769	1641	-	-
	BP	432	761	1641	-	-
	BS	432	764	1641	-	-
clpP	BC	71	846	292	673	228
	BG	71	845	292	673	228
	BH	71	846	292	672	228
	BP	71	841	292	649	228
	BS	71	846	292	682	228
rps12	BC	114	-	232	548	26
	BG	114	-	232	548	26
	BH	114	-	232	548	26
	BP	114	-	232	548	26
	BS	114	-	232	548	26
ycf3	BC	124	726	230	700	153
	BG	124	724	230	700	153
	BH	124	726	230	700	153
	BP	124	720	230	696	153
	BS	124	724	230	700	153
Notes. BC, BG, BH, BP, and BS represent Bruguiera cylindrica, B. gymnorhiza, B. hainesii, B. parviflora, and B. sexangula, respectively.
