# Supplementary material for: Complete chloroplast genome sequences of five Bruguiera species (Rhizophoraceae): comparative analysis and phylogenetic relationships
Source: PeerJ. 2021 Oct 22;9:e12268. doi: 10.7717/peerj.12268 (PMC8544253; doi:10.7717/peerj.12268)
Supplement: Supplemental Information 8 [file peerj-09-12268-s008.xlsx]

## Sheet: TS8
Table S8. Repeats of five Bruguiera species.
Species	Repeat size	R1 position	Repeat type	Repeat size	R2 position	P-value
BC	99	33971	F	99	33998	1.89e-50
BC	72	33971	F	72	34025	3.4e-34
BC	51	60704	F	51	60753	1.5e-21
BC	45	33971	F	45	34052	6.13e-18
BC	42	10384	F	42	10420	3.92e-16
BC	41	30029	F	41	30069	1.57e-15
BC	35	94353	F	35	94368	6.43e-12
BC	35	161632	F	35	161647	6.43e-12
BC	33	56313	F	33	56325	1.03e-10
BC	32	33805	F	32	33833	4.12e-10
BC	32	43739	F	32	45963	4.12e-10
BC	31	121662	F	31	121694	1.65e-09
BC	31	121729	F	31	121741	1.65e-09
BC	27	580	F	27	605	4.21e-07
BC	27	5118	F	27	5142	4.21e-07
BC	27	56103	F	27	56118	4.21e-07
BC	26	117329	F	26	138680	1.69e-06
BC	25	33824	F	25	33876	6.74e-06
BC	25	121649	F	25	121733	6.74e-06
BC	25	121649	F	25	121745	6.74e-06
BC	24	8225	F	24	8247	2.7e-05
BC	24	9776	F	24	9790	2.7e-05
BC	24	34081	F	24	34105	2.7e-05
BC	35	94353	P	35	161632	6.43e-12
BC	35	94368	P	35	161647	6.43e-12
BC	30	8369	P	30	8369	6.58e-09
BC	30	41065	P	30	41065	6.58e-09
BC	29	8134	P	29	50119	2.63e-08
BC	29	126522	P	29	126552	2.63e-08
BC	28	9731	P	28	9731	1.05e-07
BC	26	76715	P	26	76715	1.69e-06
BC	26	117329	P	26	117329	1.69e-06
BC	26	138680	P	26	138680	1.69e-06
BC	25	51954	P	25	53681	6.74e-06
BC	24	89398	P	24	122056	2.7e-05
BC	45	121708	R	45	121708	6.13e-18
BC	39	121733	R	39	121733	2.51e-14
BC	35	41200	R	35	41200	6.43e-12
BC	35	121729	R	35	121729	6.43e-12
BC	35	121946	R	35	121946	6.43e-12
BC	28	121828	R	28	121828	1.05e-07
BC	27	121745	R	27	121745	4.21e-07
BC	25	5659	R	25	5659	6.74e-06
BC	25	35108	R	25	35108	6.74e-06
BC	25	51956	R	25	51956	6.74e-06
BC	25	121649	R	25	121735	6.74e-06
BC	25	121649	R	25	121747	6.74e-06
BC	24	47529	R	24	47529	2.7e-05
BC	24	88597	R	24	88597	2.7e-05
BG	28	13508	C	28	66537	1.01e-07
BG	27	89040	C	27	146657	4.06e-07
BG	26	101098	C	26	151413	1.62e-06
BG	25	66535	C	25	151426	6.49e-06
BG	81	47275	F	81	47349	1.25e-39
BG	58	34621	F	58	34658	8.8e-26
BG	57	88799	F	57	88818	3.52e-25
BG	45	9729	F	45	9772	5.9e-18
BG	40	5527	F	40	5567	6.04e-15
BG	38	88799	F	38	88837	9.67e-14
BG	37	59918	F	37	59936	3.87e-13
BG	36	41265	F	36	41283	1.55e-12
BG	35	93989	F	35	94004	6.19e-12
BG	35	158498	F	35	158513	6.19e-12
BG	34	17500	F	34	17525	2.48e-11
BG	32	43485	F	32	45709	3.96e-10
BG	28	50271	F	28	50285	1.01e-07
BG	26	101346	F	26	101359	1.62e-06
BG	26	117014	F	26	135497	1.62e-06
BG	26	151152	F	26	151165	1.62e-06
BG	25	10369	F	25	80800	6.49e-06
BG	25	49406	F	25	49412	6.49e-06
BG	25	56089	F	25	56109	6.49e-06
BG	24	5158	F	24	66534	2.6e-05
BG	44	28735	P	44	28735	2.36e-17
BG	35	93989	P	35	158498	6.19e-12
BG	35	94004	P	35	158513	6.19e-12
BG	30	8143	P	30	8143	6.34e-09
BG	30	40562	P	30	40562	6.34e-09
BG	29	7929	P	29	49962	2.54e-08
BG	29	123360	P	29	123390	2.54e-08
BG	28	9475	P	28	9475	1.01e-07
BG	26	55876	P	26	55876	1.62e-06
BG	26	89494	P	26	89494	1.62e-06
BG	26	101346	P	26	151152	1.62e-06
BG	26	101359	P	26	151165	1.62e-06
BG	26	117014	P	26	117014	1.62e-06
BG	26	135497	P	26	135497	1.62e-06
BG	28	89035	R	28	89035	1.01e-07
BG	27	13989	R	27	13989	4.06e-07
BG	27	89040	R	27	105853	4.06e-07
BG	26	101098	R	26	101098	1.62e-06
BG	26	151413	R	26	151413	1.62e-06
BG	25	5471	R	25	5471	6.49e-06
BG	25	5479	R	25	5479	6.49e-06
BG	25	10366	R	25	40696	6.49e-06
BG	25	53536	R	25	53536	6.49e-06
BG	25	66535	R	25	101086	6.49e-06
BG	25	69084	R	25	69084	6.49e-06
BH	99	33961	F	99	33988	1.89e-50
BH	72	33961	F	72	34015	3.4e-34
BH	51	60694	F	51	60743	1.5e-21
BH	45	33961	F	45	34042	6.13e-18
BH	42	10375	F	42	10411	3.92e-16
BH	41	30019	F	41	30059	1.57e-15
BH	35	94342	F	35	94357	6.43e-12
BH	35	161621	F	35	161636	6.43e-12
BH	33	56303	F	33	56315	1.03e-10
BH	32	33795	F	32	33823	4.12e-10
BH	32	43729	F	32	45953	4.12e-10
BH	31	121651	F	31	121683	1.65e-09
BH	31	121718	F	31	121730	1.65e-09
BH	27	571	F	27	596	4.21e-07
BH	27	5109	F	27	5133	4.21e-07
BH	27	56093	F	27	56108	4.21e-07
BH	26	117318	F	26	138669	1.69e-06
BH	25	33814	F	25	33866	6.74e-06
BH	25	121638	F	25	121722	6.74e-06
BH	25	121638	F	25	121734	6.74e-06
BH	24	8216	F	24	8238	2.7e-05
BH	24	9767	F	24	9781	2.7e-05
BH	24	34071	F	24	34095	2.7e-05
BH	35	94342	P	35	161621	6.43e-12
BH	35	94357	P	35	161636	6.43e-12
BH	30	8360	P	30	8360	6.58e-09
BH	30	41055	P	30	41055	6.58e-09
BH	29	8125	P	29	50109	2.63e-08
BH	29	126511	P	29	126541	2.63e-08
BH	28	9722	P	28	9722	1.05e-07
BH	26	76705	P	26	76705	1.69e-06
BH	26	117318	P	26	117318	1.69e-06
BH	26	138669	P	26	138669	1.69e-06
BH	25	51944	P	25	53671	6.74e-06
BH	24	89387	P	24	122045	2.7e-05
BH	45	121697	R	45	121697	6.13e-18
BH	39	121722	R	39	121722	2.51e-14
BH	35	41190	R	35	41190	6.43e-12
BH	35	121718	R	35	121718	6.43e-12
BH	35	121935	R	35	121935	6.43e-12
BH	28	121817	R	28	121817	1.05e-07
BH	27	121734	R	27	121734	4.21e-07
BH	25	5650	R	25	5650	6.74e-06
BH	25	35098	R	25	35098	6.74e-06
BH	25	51946	R	25	51946	6.74e-06
BH	25	121638	R	25	121724	6.74e-06
BH	25	121638	R	25	121736	6.74e-06
BH	24	47519	R	24	47519	2.7e-05
BH	24	88586	R	24	88586	2.7e-05
BP	27	51686	C	27	53395	4.16e-07
BP	26	100825	C	26	153531	1.66e-06
BP	66	35188	F	66	35240	1.38e-30
BP	52	40858	F	52	40896	3.69e-22
BP	50	135829	F	50	135844	5.91e-21
BP	49	13749	F	49	13859	2.36e-20
BP	49	55797	F	49	55834	2.36e-20
BP	43	133447	F	43	133465	9.69e-17
BP	42	13779	F	42	13809	3.87e-16
BP	37	59764	F	37	59782	3.97e-13
BP	36	33861	F	36	33879	1.59e-12
BP	35	132028	F	35	132049	6.35e-12
BP	35	135829	F	35	135859	6.35e-12
BP	32	43746	F	32	45970	4.06e-10
BP	31	5213	F	31	5249	1.62e-09
BP	31	41040	F	31	41054	1.62e-09
BP	31	55696	F	31	55710	1.62e-09
BP	29	64177	F	29	64198	2.6e-08
BP	29	121060	F	29	121073	2.6e-08
BP	28	134041	F	28	134068	1.04e-07
BP	27	84503	F	27	84546	4.16e-07
BP	26	13827	F	26	13890	1.66e-06
BP	26	36344	F	26	36368	1.66e-06
BP	26	101073	F	26	101086	1.66e-06
BP	26	116702	F	26	137654	1.66e-06
BP	26	153270	F	26	153283	1.66e-06
BP	25	5246	F	25	40955	6.66e-06
BP	25	34922	F	25	34971	6.66e-06
BP	30	51686	P	30	53392	6.5e-09
BP	29	8233	P	29	49852	2.6e-08
BP	28	8451	P	28	8451	1.04e-07
BP	26	101073	P	26	153270	1.66e-06
BP	26	101086	P	26	153283	1.66e-06
BP	26	116702	P	26	116702	1.66e-06
BP	26	137654	P	26	137654	1.66e-06
BP	25	9970	P	25	122152	6.66e-06
BP	25	35128	P	25	121198	6.66e-06
BP	25	35140	P	25	121200	6.66e-06
BP	41	41040	R	41	41040	1.55e-15
BP	35	41050	R	35	41050	6.35e-12
BP	34	10509	R	34	10509	2.54e-11
BP	29	35860	R	29	35860	2.6e-08
BP	27	14331	R	27	14331	4.16e-07
BP	27	34962	R	27	34962	4.16e-07
BP	27	41040	R	27	41040	4.16e-07
BP	27	51686	R	27	51686	4.16e-07
BP	27	53395	R	27	53395	4.16e-07
BP	26	100825	R	26	100825	1.66e-06
BP	26	153531	R	26	153531	1.66e-06
BS	33	66568	C	33	121605	1.03e-10
BS	28	66556	C	28	66580	1.05e-07
BS	27	14075	C	27	89093	4.21e-07
BS	88	121417	F	88	121470	7.91e-44
BS	80	122744	F	80	122781	5.19e-39
BS	58	34671	F	58	34708	9.12e-26
BS	52	122865	F	52	122898	3.74e-22
BS	50	34754	F	50	34801	5.98e-21
BS	47	10341	F	47	10379	3.83e-19
BS	45	9768	F	45	9811	6.12e-18
BS	43	122744	F	43	122818	9.8e-17
BS	40	5578	F	40	5632	6.27e-15
BS	37	59951	F	37	59969	4.01e-13
BS	36	41310	F	36	41328	1.61e-12
BS	35	94044	F	35	94059	6.42e-12
BS	35	121417	F	35	121523	6.42e-12
BS	35	161504	F	35	161519	6.42e-12
BS	33	47410	F	33	47426	1.03e-10
BS	32	43530	F	32	45754	4.11e-10
BS	32	66574	F	32	66591	4.11e-10
BS	30	55516	F	30	55542	6.57e-09
BS	28	50258	F	28	50272	1.05e-07
BS	28	94105	F	28	94114	1.05e-07
BS	28	161456	F	28	161465	1.05e-07
BS	27	10432	F	27	66564	4.21e-07
BS	46	66556	P	46	66556	1.53e-18
BS	38	28813	P	38	28813	1e-13
BS	36	9538	P	36	9538	1.61e-12
BS	36	13598	P	36	13598	1.61e-12
BS	35	94044	P	35	161504	6.42e-12
BS	35	94059	P	35	161519	6.42e-12
BS	32	122956	P	32	122956	4.11e-10
BS	30	8206	P	30	8206	6.57e-09
BS	30	40624	P	30	40624	6.57e-09
BS	29	7992	P	29	49949	2.63e-08
BS	29	126337	P	29	126367	2.63e-08
BS	28	66556	P	28	66591	1.05e-07
BS	28	94105	P	28	161456	1.05e-07
BS	28	94114	P	28	161465	1.05e-07
BS	27	10432	P	27	66567	4.21e-07
BS	27	66581	P	27	121611	4.21e-07
BS	47	66576	R	47	66576	3.83e-19
BS	39	121349	R	39	121349	2.51e-14
BS	34	66574	R	34	66574	2.57e-11
BS	33	66557	R	33	121605	1.03e-10
BS	30	66593	R	30	66593	6.57e-09
BS	29	10408	R	29	10408	2.63e-08
BS	29	10434	R	29	10434	2.63e-08
BS	27	14079	R	27	14079	4.21e-07
Notes. BC, BG, BH, BP, and BS represent Bruguiera cylindrica, B. gymnorhiza, B. hainesii, B. parviflora, and B. sexangula, respectively.
