# Supplementary material for: Complete chloroplast genome sequences of five Bruguiera species (Rhizophoraceae): comparative analysis and phylogenetic relationships
Source: PeerJ. 2021 Oct 22;9:e12268. doi: 10.7717/peerj.12268 (PMC8544253; doi:10.7717/peerj.12268)
Supplement: Supplemental Information 9 [file peerj-09-12268-s009.xlsx]

## Sheet: TS9
Table S9. SSRs of five Bruguiera species and three related mangrove species.
Species	SSR type	SSR	Size	Start	End
BC	p2	(TA)7	14	10	23
BC	p1	(A)16	16	399	414
BC	c	(AATA)3ttactaaaaaaggagcaatacccaatttcttgttctatcaagaagcttggtattgctcccctttttagc(T)14	95	623	717
BC	p2	(AT)6	12	2093	2104
BC	p1	(A)15	15	2207	2221
BC	p3	(TTA)4	12	4057	4068
BC	p1	(A)13	13	4289	4301
BC	c	(AAAT)3aaagagattgaatcgtatgacacaatcaaaacattaaatt(AGAA)3	64	4856	4919
BC	p5	(AAAAT)3	15	5042	5056
BC	p2	(TA)5	10	5290	5299
BC	p3	(TTA)4	12	5622	5633
BC	p1	(T)10	10	5841	5850
BC	c	(A)12caaaagaattaatttaattcaatttaaccaaaaaaattcactataaactatataaactatattaaaaaa(AAT)4	93	6061	6153
BC	p1	(A)10	10	6561	6570
BC	p1	(T)11	11	7736	7746
BC	p1	(A)12	12	8103	8114
BC	p4	(TTAA)3	12	8379	8390
BC	p2	(CT)6	12	9654	9665
BC	c	(TA)5c(TA)5	21	9927	9947
BC	p1	(A)13	13	10105	10117
BC	c*	(ATTA)3(ATT)4*ataattctaattaatt(ATTA)3(ATT)4*ataattc(TAT)4aat(TA)6ttaattaatatattaattatatatat(TA)7	130	10398	10527
BC	c	(C)10(A)15	25	12238	12262
BC	p1	(A)10	10	12872	12881
BC	c	(TTA)4(T)12attttcattttatatataaa(AT)5tataaaatatataataaa(AT)7ttatatattaattttatatattatttatatatattattccttattttattcttctgctcttgtttc(T)10cttgttttttttagtcatttacctattatttctaatagatcgaactaaacagaataaaaaaaaatgtattcgatttatagtataaatcga(T)12	264	13626	13889
BC	p1	(A)11	11	13994	14004
BC	c	(A)10tacaat(A)12gaaataaataaaaaaactataggagtgaaatcttgatataatttgaaaaagcaagcagcaaatccaaggtaat(A)10	111	14140	14250
BC	p1	(T)10	10	14792	14801
BC	p1	(T)11	11	15129	15139
BC	p1	(T)11	11	15607	15617
BC	p1	(A)10	10	17489	17498
BC	p1	(A)15	15	17711	17725
BC	p1	(T)11	11	19796	19806
BC	p2	(AT)5	10	21193	21202
BC	c	(C)10(A)10ctactccttactcaagttcccaataaagaccaaacaccatttcattgatttagtc(T)14acg(T)12	104	23900	24003
BC	p1	(A)11	11	28225	28235
BC	c	(A)11ggtttgtgagatatatttttatctatttttttaatagacttcctatcatatatc(ATATA)3	80	28689	28768
BC	p6	(TATAGA)3	18	28919	28936
BC	p1	(A)11	11	29457	29467
BC	p1	(T)10	10	30492	30501
BC	p1	(T)10	10	30923	30932
BC	p1	(T)11	11	31121	31131
BC	p1	(A)10	10	32653	32662
BC	c	(AAT)5ctaaattatata(AAT)5ctaaattatata(AAT)5ctaaattatata(AAT)5ctaaattatataaataataatagaaaatcatatataaataataatagaaaatca(AAATAG)3	168	33980	34147
BC	p1	(A)12	12	36344	36355
BC	p4	(ATCT)4	16	36675	36690
BC	p1	(G)11	11	38527	38537
BC	p2	(AT)8	16	39985	40000
BC	p5	(AATGT)3	15	40463	40477
BC	c	(ACTAA)3tataataactaatatactaatatattacattactatttataaatg(TATAAA)3	78	40624	40701
BC	p2	(TA)6	12	41009	41020
BC	c	(T)10ataa(T)10	24	41270	41293
BC	p1	(A)10	10	41422	41431
BC	p1	(T)11	11	41594	41604
BC	p1	(A)10	10	41706	41715
BC	p6	(TATTAC)3	18	47182	47199
BC	p4	(AAGA)3	12	48114	48125
BC	c	(T)10attagtaaattttgc(TCTT)3	37	48430	48466
BC	p1	(A)13	13	49428	49440
BC	p6	(ATAGGT)3	18	49574	49591
BC	p1	(A)11	11	49694	49704
BC	c	(A)12ttctttttatcccccaatcccgagagaaaggtctttatttgattaaaagtttccta(T)10	78	49890	49967
BC	c	(A)15g(A)12	28	51954	51981
BC	p1	(T)13	13	52793	52805
BC	p1	(T)12	12	52917	52928
BC	p1	(T)13	13	53181	53193
BC	c	(T)10c(T)14	25	53682	53706
BC	p1	(T)13	13	55145	55157
BC	p1	(T)10	10	55750	55759
BC	p1	(A)11	11	57706	57716
BC	p6	(ATAAAT)3	18	57836	57853
BC	p1	(A)10	10	60245	60254
BC	c	(A)10ggattctcttttgcttttgtaagaacccgaagtattccttcactatatatgaaaatatgaaaaaccactcca(T)18	100	63049	63148
BC	p2	(AT)5	10	65730	65739
BC	c	(TA)5atatacgaacaattatc(A)11tgaaactttttttgtccgcaa(T)14	73	66839	66911
BC	p1	(A)11	11	67245	67255
BC	p1	(T)11	11	68020	68030
BC	p4	(TTAT)3	12	69356	69367
BC	p4	(TTCT)3	12	69986	69997
BC	c	(A)10tggattcattttttcatttatatatttctatgaataaagtattatgattattaagaactcaacggagtaccccccccc(T)11	99	70122	70220
BC	c	(TAA)4ttcatgaaagagattatcatattgtcacaattaaattcgatgcgaaatctaaaaatccctccttcgtattcgtagttgtataagaagag(T)10gaatccctttttaa(T)12	137	71359	71495
BC	p1	(A)10	10	71693	71702
BC	p1	(T)11	11	71825	71835
BC	p1	(A)11	11	71974	71984
BC	p1	(T)11	11	72184	72194
BC	p1	(A)12	12	73433	73444
BC	p1	(A)13	13	75169	75181
BC	c	(T)14caaat(A)10	29	77336	77364
BC	c	(A)11tcaatgtgtagcttccagccctcc(T)10	45	78073	78117
BC	p1	(T)10	10	78425	78434
BC	c	(TC)6tatatatatttaattt(TA)5	38	81063	81100
BC	p1	(T)16	16	85203	85218
BC	p4	(GGAT)3	12	86888	86899
BC	p1	(T)10	10	87127	87136
BC	p1	(T)11	11	87463	87473
BC	c	(A)16gaaatattgtttgtcc(A)17	49	88602	88650
BC	c*	(T)15(TTTA)3*	24	89405	89428
BC	p4	(TTTC)3	12	89976	89987
BC	p1	(A)13	13	90238	90250
BC	p1	(A)10	10	90362	90371
BC	p1	(T)10	10	91952	91961
BC	p2	(TA)6	12	101435	101446
BC	p2	(AT)5	10	101572	101581
BC	p1	(T)13	13	104182	104194
BC	p3	(TTA)4	12	106222	106233
BC	p1	(T)10	10	110308	110317
BC	c	(A)14tgaaaaggtcgtcttattcaaaaccccaattatgaaatcccttctctcccacttcacacctcggaacgcaccgttcttat(AG)5	104	115382	115485
BC	p1	(T)10	10	118879	118888
BC	c*	(TAA)4(A)14*	24	120460	120483
BC	c	(T)10aattactttattcaaaatcattaattagttcattttgggattgatttatggtcttgtattcattatgtttgt(A)11	93	120804	120896
BC	p1	(A)10	10	121285	121294
BC	c	(TATAT)3attagaatattatattatatattgtattatatattagaatattatattatatattatattattatatta(TATAT)3attatattatatattataatatatattataataat(TA)5ataat(TA)5ataatataaataataattaataattaaaaaattaataattaaaataataattaaaaaat(TA)5	228	121656	121883
BC	c	(AT)9aataaa(AT)5aataaaaaatataataat(A)15	67	122008	122074
BC	c	(T)10gtttaataaatttaaaattttaaaaacaatac(T)11gtaaacaaaacaaaaagtgaaatttcgtgtctttgctttattattc(T)10	109	122198	122306
BC	p1	(T)11	11	123024	123034
BC	c	(TA)5atatataaatatag(AT)6agatagatatagatagttatatatttatatatagtcggtataataggggagtttctttgtataagagaagagtataaact(A)11	127	123157	123283
BC	p1	(A)10	10	124527	124536
BC	c	(T)13acttaaatttaagagaataaaaagaaagtttcttttatttataactttataacaatttaaaattaaaacaaaaaaaaacataagattaggttttgattg(TTTAT)3	127	124852	124978
BC	p4	(AATA)3	12	125197	125208
BC	p5	(TTAGA)3	15	128542	128556
BC	p1	(T)10	10	129211	129220
BC	c	(A)11gaattgggcattcctttagttcatgaattatgatatgaactcgctctctatgaatatggatatag(A)10gaaa(AAAGT)3	105	130109	130213
BC	p3	(TAT)4	12	130356	130367
BC	c	(AATC)3ttggggtaaccggtctcggtctcgtattcttatgtctctttttgttttacttttgtacataagaaatgagtctcaa(T)10	98	130576	130673
BC	p1	(A)12	12	132721	132732
BC	p1	(A)14	14	133359	133372
BC	p1	(T)11	11	134717	134727
BC	p1	(T)10	10	134831	134840
BC	p1	(T)10	10	137241	137250
BC	c	(CT)5ataagaacggtgcgttccgaggtgtgaagtgggagagaagggatttcataattggggttttgaataagacgaccttttca(T)14	104	140551	140654
BC	p1	(A)10	10	145719	145728
BC	p3	(ATA)4	12	149802	149813
BC	p1	(A)13	13	151842	151854
BC	p2	(AT)5	10	154455	154464
BC	p2	(AT)6	12	154589	154600
BC	p1	(A)10	10	164075	164084
BG	p1	(A)13	13	405	417
BG	c	(AATA)3ttactaaaaaaggagcaatacccaatttcttgttctatcaagaagcttggtattgctcccctttttagc(T)14	95	587	681
BG	p2	(TA)5	10	2020	2029
BG	p1	(A)11	11	2133	2143
BG	p3	(TTA)4	12	3979	3990
BG	p1	(A)10	10	4199	4208
BG	c	(AAAT)3aaagagattgaatcgtatgacacaatcaaaacattaaatt(AGAA)3	64	4762	4825
BG	p2	(TA)7	14	5168	5181
BG	p3	(TTA)4	12	5468	5479
BG	p1	(T)11	11	5653	5663
BG	c	(A)14caaaagaattaattcaattcaatttaaccaaaaaaattcactataaactatataaactatatt(A)12taataattaaataataacaaattaaataataac(A)10	132	5874	6005
BG	p1	(A)11	11	6350	6360
BG	p1	(A)10	10	7900	7909
BG	p4	(TTAA)3	12	8153	8164
BG	p2	(CT)6	12	9113	9124
BG	p2	(CT)6	12	9398	9409
BG	p2	(TA)5	10	9658	9667
BG	c*	(ATTA)3(ATT)4*ataat(TA)6ttaattaatatatta(ATT)4(TA)6*ttattttaatttaatttag(TA)8	110	10268	10377
BG	c	(C)10(A)13	23	12090	12112
BG	p1	(A)11	11	12722	12732
BG	c	(TTA)6(T)18atataatattttatata(AT)11tttatatatttatatattaattttatatattatttatatatattattctttattttattcttctgctcttgtttc(T)13cttgtttttttttagtcatttacctattatttctaatagatcgaactaaacagaataaaaaaaaatgtattcgatttatagtataaatcga(T)10	264	13462	13725
BG	p1	(G)10	10	13863	13872
BG	p4	(AAAT)4	16	13994	14009
BG	p1	(T)14	14	14641	14654
BG	p1	(T)10	10	14984	14993
BG	c	(T)11acaattcgccaatatcgtaagctgttttactattcctctagattgtatagac(T)10ctatttgtgtatatttatgtttactaagtagattctcttgagcaaggcagggattgccttgcattgcactaagct(A)10	158	15457	15614
BG	p1	(A)17	17	17571	17587
BG	p1	(T)11	11	19658	19668
BG	p2	(AT)5	10	21055	21064
BG	c	(A)10ctactccttactcaagttcccaataaagaccaaacaccatttcattgattcagtc(T)11acg(T)12	91	23771	23861
BG	p1	(A)11	11	28083	28093
BG	p2	(TA)8	16	28750	28765
BG	c	(A)12(G)11	23	29291	29313
BG	p1	(T)10	10	30277	30286
BG	p1	(T)10	10	30865	30874
BG	p5	(ATTTT)3	15	31327	31341
BG	p5	(CAAAT)3	15	31507	31521
BG	c	(A)10(G)11	21	32402	32422
BG	c	(AAT)4attatata(AAT)4	32	33636	33667
BG	p4	(AAAT)3	12	35079	35090
BG	p2	(AT)5	10	35535	35544
BG	p1	(A)10	10	35982	35991
BG	p4	(ATCT)4	16	36311	36326
BG	p1	(G)11	11	38172	38182
BG	p2	(AT)6	12	39630	39641
BG	c	(ACTAA)3tataataactaatatactaatatattacattactatttataaattata(AT)5	73	40305	40377
BG	c	(TA)6ttatt(TA)6	29	40693	40721
BG	p1	(T)11	11	41002	41012
BG	p4	(AAGA)3	12	47949	47960
BG	c	(T)10attagtagattttgc(TCTT)3	37	48265	48301
BG	p1	(A)11	11	49263	49273
BG	p6	(ATAGGT)5	30	49407	49436
BG	p1	(T)13	13	49798	49810
BG	p1	(A)10	10	51295	51304
BG	p1	(A)11	11	51827	51837
BG	p1	(T)11	11	53038	53048
BG	c	(T)12c(T)13	26	53537	53562
BG	p1	(T)12	12	54992	55003
BG	p1	(T)11	11	56728	56738
BG	p1	(A)10	10	57450	57459
BG	p1	(A)12	12	60006	60017
BG	p1	(A)13	13	60518	60530
BG	c	(A)11tgattctcttttgcttttgtaagaacccgaagtattccttcactatatatgaaaatatgaaaaaccactcca(T)14	97	62773	62869
BG	c	(TA)5t(TA)11ccaaatatacgtatataccaaatatacgaacaattatc(A)10tgaaactttttttgtccgcaa(T)15	117	66533	66649
BG	p1	(A)11	11	66983	66993
BG	p1	(T)10	10	67758	67767
BG	c	(T)11attta(T)10	26	69084	69109
BG	p4	(TTCT)3	12	69722	69733
BG	p1	(A)15	15	69858	69872
BG	c	(TAA)4ttcaggaaagagattatcatattgtcacaattaaattcgatgcgaaatctaaaaatccctccttcgtattcgtagttgtataagaagag(T)10gaatcccttttaaaa(T)12	138	71098	71235
BG	p1	(A)11	11	71711	71721
BG	p1	(T)12	12	71921	71932
BG	p1	(A)11	11	73159	73169
BG	c	(A)15cgaattggggaataaatc(T)10	43	74850	74892
BG	p1	(T)11	11	75569	75579
BG	p1	(A)10	10	76798	76807
BG	p1	(A)10	10	77038	77047
BG	p1	(A)10	10	77248	77257
BG	p1	(T)12	12	78109	78120
BG	c	(TA)8tttttttaattt(TA)5	38	80756	80793
BG	p1	(T)11	11	84827	84837
BG	p6	(CATTCC)3	18	85410	85427
BG	c	(GGAT)3atatccatttcatgtcaaaatagacc(T)10	48	86508	86555
BG	p1	(T)11	11	86748	86758
BG	p1	(T)10	10	87085	87094
BG	p1	(A)17	17	88228	88244
BG	c	(T)12(ATTT)3	24	89044	89067
BG	p1	(T)11	11	89459	89469
BG	p4	(TTTC)3	12	89606	89617
BG	p1	(A)12	12	89874	89885
BG	p1	(A)12	12	89997	90008
BG	p2	(TA)8	16	101087	101102
BG	p1	(T)12	12	103853	103864
BG	c	(TTTA)3(T)12attattattatat(TTA)4taattatattatttgaattctattatttgaattctattatttttta(TAT)4	107	105854	105960
BG	c	(A)12tgaaaaggtcgtcttattcaaaaccccaattatgaaatcccttctctcccacttcacacctcggaacgcaccgttcttat(AG)5	102	115073	115174
BG	p1	(A)11	11	117746	117756
BG	p1	(T)10	10	118518	118527
BG	p1	(A)13	13	120106	120118
BG	p1	(A)11	11	121362	121372
BG	c	(T)13acttaaatttaagagaataaaaagaaagtttcttttatttataactttataacaatttaaaattaaaac(A)11cataagattaggttttgattg(TTTAT)4	134	121694	121827
BG	p4	(AATA)3	12	122035	122046
BG	p1	(T)10	10	126045	126054
BG	c	(A)10gaattgggcattcctttagttcatgaattatgatatgaactcgctctctatgaatatggatatag(A)10g(A)11	97	126943	127039
BG	p3	(TAT)4	12	127189	127200
BG	c	(AATC)3ttggggtaaccggtctcggtctcgtattcttatgtctctttttgttttacttttgtacataagaaatgagtctcaa(T)10	98	127403	127500
BG	p1	(A)12	12	129548	129559
BG	p1	(A)13	13	130178	130190
BG	p1	(T)10	10	131543	131552
BG	p1	(T)10	10	131657	131666
BG	p1	(T)10	10	134067	134076
BG	c	(CT)5ataagaacggtgcgttccgaggtgtgaagtgggagagaagggatttcataattggggttttgaataagacgaccttttca(T)12	102	137364	137465
BG	c*	(AAT)4ataaaaaataatagaattcaaataatagaattcaaataatataatt(ATA)4aat(ATA)4(A)12*(TAAA)3	108	146577	146684
BG	p1	(A)12	12	148674	148685
BG	p2	(AT)8	16	151435	151450
BG	c	(TA)5tt(TA)9	30	161165	161194
BH	p2	(TA)7	14	1	14
BH	p1	(A)16	16	390	405
BH	c	(AATA)3ttactaaaaaaggagcaatacccaatttcttgttctatcaagaagcttggtattgctcccctttttagc(T)14	95	614	708
BH	p2	(AT)6	12	2084	2095
BH	p1	(A)15	15	2198	2212
BH	p3	(TTA)4	12	4048	4059
BH	p1	(A)13	13	4280	4292
BH	c	(AAAT)3aaagagattgaatcgtatgacacaatcaaaacattaaatt(AGAA)3	64	4847	4910
BH	p5	(AAAAT)3	15	5033	5047
BH	p2	(TA)5	10	5281	5290
BH	p3	(TTA)4	12	5613	5624
BH	p1	(T)10	10	5832	5841
BH	c	(A)12caaaagaattaatttaattcaatttaaccaaaaaaattcactataaactatataaactatattaaaaaa(AAT)4	93	6052	6144
BH	p1	(A)10	10	6552	6561
BH	p1	(T)11	11	7727	7737
BH	p1	(A)12	12	8094	8105
BH	p4	(TTAA)3	12	8370	8381
BH	p2	(CT)6	12	9645	9656
BH	c	(TA)5c(TA)5	21	9918	9938
BH	p1	(A)16	16	10093	10108
BH	c*	(ATTA)3(ATT)4*ataattctaattaatt(ATTA)3(ATT)4*ataattc(TAT)4aat(TA)6ttaattaatatattaattatatatat(TA)7	130	10389	10518
BH	c	(C)10(A)15	25	12229	12253
BH	p1	(A)10	10	12863	12872
BH	c	(TTA)4(T)12attttcattttatatataaa(AT)5tataaaatatataataaa(AT)7ttatatattaattttatatattatttatatatattattccttattttattcttctgctcttgtttc(T)10cttgttttttttagtcatttacctattatttctaatagatcgaactaaacagaataaaaaaaaatgtattcgatttatagtataaatcga(T)12	264	13617	13880
BH	p1	(A)11	11	13985	13995
BH	c	(A)10tacaat(A)12gaaataaataaaaaaactataggagtgaaatcttgatataatttgaaaaagcaagcagcaaatccaaggtaat(A)10	111	14131	14241
BH	p1	(T)10	10	14783	14792
BH	p1	(T)11	11	15120	15130
BH	p1	(T)11	11	15598	15608
BH	p1	(A)10	10	17480	17489
BH	p1	(A)15	15	17702	17716
BH	p1	(T)11	11	19787	19797
BH	p2	(AT)5	10	21184	21193
BH	c	(C)10(A)10ctactccttactcaagttcccaataaagaccaaacaccatttcattgatttagtc(T)14acg(T)12	104	23891	23994
BH	p1	(A)11	11	28216	28226
BH	c	(A)11ggtttgtgagatatatttttatctatttttttaatagacttcctatcatatatc(ATATA)3	80	28680	28759
BH	p6	(TATAGA)3	18	28910	28927
BH	p1	(A)10	10	29448	29457
BH	p1	(T)10	10	30482	30491
BH	p1	(T)10	10	30913	30922
BH	p1	(T)11	11	31111	31121
BH	p1	(A)10	10	32643	32652
BH	c	(AAT)5ctaaattatata(AAT)5ctaaattatata(AAT)5ctaaattatata(AAT)5ctaaattatataaataataatagaaaatcatatataaataataatagaaaatca(AAATAG)3	168	33970	34137
BH	p1	(A)12	12	36334	36345
BH	p4	(ATCT)4	16	36665	36680
BH	p1	(G)11	11	38517	38527
BH	p2	(AT)8	16	39975	39990
BH	p5	(AATGT)3	15	40453	40467
BH	c	(ACTAA)3tataataactaatatactaatatattacattactatttataaatg(TATAAA)3	78	40614	40691
BH	p2	(TA)6	12	40999	41010
BH	c	(T)10ataa(T)10	24	41260	41283
BH	p1	(A)10	10	41412	41421
BH	p1	(T)11	11	41584	41594
BH	p1	(A)10	10	41696	41705
BH	p6	(TATTAC)3	18	47172	47189
BH	p4	(AAGA)3	12	48104	48115
BH	c	(T)10attagtaaattttgc(TCTT)3	37	48420	48456
BH	p1	(A)13	13	49418	49430
BH	p6	(ATAGGT)3	18	49564	49581
BH	p1	(A)11	11	49684	49694
BH	c	(A)12ttctttttatcccccaatcccgagagaaaggtctttatttgattaaaagtttccta(T)10	78	49880	49957
BH	c	(A)15g(A)12	28	51944	51971
BH	p1	(T)13	13	52783	52795
BH	p1	(T)12	12	52907	52918
BH	p1	(T)13	13	53171	53183
BH	c	(T)10c(T)14	25	53672	53696
BH	p1	(T)13	13	55135	55147
BH	p1	(T)10	10	55740	55749
BH	p1	(A)11	11	57696	57706
BH	p6	(ATAAAT)3	18	57826	57843
BH	p1	(A)10	10	60235	60244
BH	c	(A)10ggattctcttttgcttttgtaagaacccgaagtattccttcactatatatgaaaatatgaaaaaccactcca(T)18	100	63039	63138
BH	p2	(AT)5	10	65720	65729
BH	c	(TA)5atatacgaacaattatc(A)11tgaaactttttttgtccgcaa(T)14	73	66829	66901
BH	p1	(A)11	11	67235	67245
BH	p1	(T)11	11	68010	68020
BH	p4	(TTAT)3	12	69346	69357
BH	p4	(TTCT)3	12	69976	69987
BH	c	(A)10tggattcattttttcatttatatatttctatgaataaagtattatgattattaagaactcaacggagtaccccccccc(T)11	99	70112	70210
BH	c	(TAA)4ttcatgaaagagattatcatattgtcacaattaaattcgatgcgaaatctaaaaatccctccttcgtattcgtagttgtataagaagag(T)10gaatccctttttaa(T)12	137	71349	71485
BH	p1	(A)10	10	71683	71692
BH	p1	(T)11	11	71815	71825
BH	p1	(A)11	11	71964	71974
BH	p1	(T)11	11	72174	72184
BH	p1	(A)12	12	73423	73434
BH	p1	(A)13	13	75159	75171
BH	c	(T)13caaat(A)10	28	77326	77353
BH	c	(A)11tcaatgtgtagcttccagccctcc(T)10	45	78062	78106
BH	p1	(T)10	10	78414	78423
BH	c	(TC)6tatatatatttaattt(TA)5	38	81052	81089
BH	p1	(T)16	16	85192	85207
BH	p4	(GGAT)3	12	86877	86888
BH	p1	(T)10	10	87116	87125
BH	p1	(T)11	11	87452	87462
BH	c	(A)16gaaatattgtttgtcc(A)17	49	88591	88639
BH	c*	(T)15(TTTA)3*	24	89394	89417
BH	p4	(TTTC)3	12	89965	89976
BH	p1	(A)13	13	90227	90239
BH	p1	(A)10	10	90351	90360
BH	p1	(T)10	10	91941	91950
BH	p2	(TA)6	12	101424	101435
BH	p2	(AT)5	10	101561	101570
BH	p1	(T)13	13	104171	104183
BH	p3	(TTA)4	12	106211	106222
BH	p1	(T)10	10	110297	110306
BH	c	(A)14tgaaaaggtcgtcttattcaaaaccccaattatgaaatcccttctctcccacttcacacctcggaacgcaccgttcttat(AG)5	104	115371	115474
BH	p1	(T)10	10	118868	118877
BH	c*	(TAA)4(A)14*	24	120449	120472
BH	c	(T)10aattactttattcaaaatcattaattagttcattttgggattgatttatggtcttgtattcattatgtttgt(A)11	93	120793	120885
BH	p1	(A)10	10	121274	121283
BH	c	(TATAT)3attagaatattatattatatattgtattatatattagaatattatattatatattatattattatatta(TATAT)3attatattatatattataatatatattataataat(TA)5ataat(TA)5ataatataaataataattaataattaaaaaattaataattaaaataataattaaaaaat(TA)5	228	121645	121872
BH	c	(AT)9aataaa(AT)5aataaaaaatataataat(A)15	67	121997	122063
BH	c	(T)10gtttaataaatttaaaattttaaaaacaatac(T)11gtaaacaaaacaaaaagtgaaatttcgtgtctttgctttattattc(T)10	109	122187	122295
BH	p1	(T)11	11	123013	123023
BH	c	(TA)5atatataaatatag(AT)6agatagatatagatagttatatatttatatatagtcggtataataggggagtttctttgtataagagaagagtataaact(A)11	127	123146	123272
BH	p1	(A)10	10	124516	124525
BH	c	(T)13acttaaatttaagagaataaaaagaaagtttcttttatttataactttataacaatttaaaattaaaacaaaaaaaaacataagattaggttttgattg(TTTAT)3	127	124841	124967
BH	p4	(AATA)3	12	125186	125197
BH	p5	(TTAGA)3	15	128531	128545
BH	p1	(T)10	10	129200	129209
BH	c	(A)11gaattgggcattcctttagttcatgaattatgatatgaactcgctctctatgaatatggatatag(A)10gaaa(AAAGT)3	105	130098	130202
BH	p3	(TAT)4	12	130345	130356
BH	c	(AATC)3ttggggtaaccggtctcggtctcgtattcttatgtctctttttgttttacttttgtacataagaaatgagtctcaa(T)10	98	130565	130662
BH	p1	(A)12	12	132710	132721
BH	p1	(A)14	14	133348	133361
BH	p1	(T)11	11	134706	134716
BH	p1	(T)10	10	134820	134829
BH	p1	(T)10	10	137230	137239
BH	c	(CT)5ataagaacggtgcgttccgaggtgtgaagtgggagagaagggatttcataattggggttttgaataagacgaccttttca(T)14	104	140540	140643
BH	p1	(A)10	10	145708	145717
BH	p3	(ATA)4	12	149791	149802
BH	p1	(A)13	13	151831	151843
BH	p2	(AT)5	10	154444	154453
BH	p2	(AT)6	12	154578	154589
BH	p1	(A)10	10	164064	164073
BH	p2	(TA)6	12	164283	164294
BP	c	(T)10aatctaacataataactttcc(A)12	43	412	454
BP	c	(AATA)3ttactaaaaaaggagcaatacccaatttcttgttctatcaagaagcttggtattgctcccctttttagtttagc(T)15	101	611	711
BP	p1	(A)10	10	2167	2176
BP	p3	(GAA)4	12	3334	3345
BP	p3	(TTA)4	12	4024	4035
BP	p1	(A)11	11	4249	4259
BP	c	(AAAT)3aaagagattgaatcgtatgacacaatcaaaacattaaatt(AGAA)3	64	4813	4876
BP	p1	(A)12	12	4983	4994
BP	c	(TA)6ttatttatatttgatttgaatt(TA)7ttatttat(ATTTG)3	71	5214	5284
BP	p3	(TTA)4	12	5595	5606
BP	p1	(T)11	11	5767	5777
BP	p1	(T)14	14	5899	5912
BP	c	(A)13caaaagaattaattcaattcaatttaaccaaaaaaattcactataaactatataaactatatt(A)21tgaaataataacaaattaaataataac(A)11	135	6113	6247
BP	p1	(A)11	11	6597	6607
BP	p1	(A)10	10	6725	6734
BP	p1	(T)13	13	7812	7824
BP	p1	(A)10	10	8204	8213
BP	c	(A)10gcctttttttttccatttctctttttttagctctctttattactttcctaattcgtaattattcttaattaattattc(TTAA)3	100	8372	8471
BP	p2	(CT)6	12	9435	9446
BP	c	(CT)6attctac(AT)5	29	9719	9747
BP	p2	(TA)5	10	9973	9982
BP	p1	(A)14	14	10177	10190
BP	c	(TATTA)3ttttaattattataata(AT)8tt(TA)8ttatttaataaa(AT)9tttttttaatttaatttagtatatattatata(AT)6	140	10478	10617
BP	p1	(A)21	21	12363	12383
BP	p1	(A)11	11	12993	13003
BP	c	(TTA)4tgatgatttatatatatt(TA)6ttttttatatattaattttatttatatattaattttatatattaattttatttatatattaattttata(TAT)5gatttatatatatt(TA)6ttttttatatattaattttatatattattctttcttttattcttctgctcttgtttc(T)12cttg(T)10agtcatttacctattattgctaatagatcgaactaaacagaat(A)10	288	13736	14023
BP	c	(AAAT)6aaactataggagtgaaatcttgatagaatttgaaaaagcaagcagcaaatccacggtaat(A)10	94	14332	14425
BP	p1	(T)13	13	14989	15001
BP	p2	(TA)6	12	15278	15289
BP	p1	(T)11	11	15794	15804
BP	p1	(A)11	11	17891	17901
BP	p1	(T)11	11	19972	19982
BP	p2	(AT)5	10	21363	21372
BP	c	(T)11acg(T)10	24	24148	24171
BP	p1	(A)10	10	28393	28402
BP	c	(A)15ggtttgtgagatatatttttatctatttttttaatagacttcgtatc(ATATA)3	77	28856	28932
BP	p1	(T)10	10	29080	29089
BP	p1	(T)11	11	30562	30572
BP	p1	(T)10	10	31152	31161
BP	p5	(CAAAT)3	15	31801	31815
BP	p1	(T)10	10	32087	32096
BP	c	(AAT)5aaag(AAT)4ataaaactaatata(AAT)4	57	33916	33972
BP	p1	(T)10	10	34247	34256
BP	c	(ATAA)3gaat(ATAA)3	28	35371	35398
BP	p4	(ATCT)4	16	36577	36592
BP	p1	(G)11	11	38438	38448
BP	p5	(ACTAA)3	15	40517	40531
BP	c	(AT)8aattatataaact(TA)5tt(TA)7attatataaact(TA)5tt(TA)8ttaact(TA)7ttatttatatatattattttataaattatatgtaaaat(TA)6ttatattataaattt(TA)5	190	40856	41045
BP	c	(AATA)3ttataataaatatataaat(AATA)3	43	41210	41252
BP	p1	(A)12	12	41430	41441
BP	p4	(AAAC)3	12	48045	48056
BP	p4	(AAGA)3	12	48163	48174
BP	p4	(TCTT)3	12	48503	48514
BP	p1	(A)10	10	49473	49482
BP	p6	(ATAGGT)3	18	49616	49633
BP	p1	(A)15	15	51178	51192
BP	c	(A)16g(A)13	30	51684	51713
BP	p1	(T)15	15	52519	52533
BP	p1	(T)11	11	52911	52921
BP	c	(T)13c(T)13	27	53396	53422
BP	p1	(T)14	14	54855	54868
BP	c	(T)14attataccttatatactacactttatatactactttattttattactttattttattactttattttctat(TA)5	95	55392	55486
BP	p1	(T)12	12	56632	56643
BP	p1	(A)11	11	59852	59862
BP	c	(A)10tgattctcttttgcttttgtaagaacccgaagtattccttcactatatatgaaaaaccactcaa(T)11	85	62630	62714
BP	p5	(TATTA)4	20	65351	65370
BP	c	(TA)6aaatatatataaaagaaaatgtat(TA)12ccaaatatattatatacccaatatacgaacaattatc(A)10tgaaactttttttgtccgcaa(T)17	145	66230	66374
BP	p1	(A)11	11	66707	66717
BP	p1	(T)12	12	67482	67493
BP	c	(T)11c(T)12	24	68810	68833
BP	p4	(TTCT)3	12	69513	69524
BP	c	(A)12tggattcattttttcatttatatatttctatgaataaagtattatgattattaagaactcaacggagta(C)10	91	69652	69742
BP	c	(TAA)4ttcatgaaagagattatcatattgtcacaattaaattcgatgcgaaatctaaaaatccctccttcgtattcgtagttgtataagaagag(T)11aatcccttttttaa(T)16	142	70891	71032
BP	p1	(A)10	10	71235	71244
BP	p1	(A)10	10	71521	71530
BP	p1	(T)10	10	71730	71739
BP	p1	(A)13	13	72962	72974
BP	p1	(A)10	10	74654	74663
BP	p1	(T)11	11	75373	75383
BP	p1	(A)10	10	76839	76848
BP	p1	(A)10	10	77540	77549
BP	p1	(T)10	10	77887	77896
BP	p1	(T)19	19	80538	80556
BP	p1	(T)14	14	84639	84652
BP	c	(GGAT)3atatccatttcatgtcaaaatagacc(T)10	48	86317	86364
BP	p1	(T)15	15	86892	86906
BP	p1	(A)10	10	88019	88028
BP	p4	(TTTC)3	12	89360	89371
BP	c	(T)10gttcaatcaaaat(A)16	39	89730	89768
BP	p1	(T)10	10	91371	91380
BP	p2	(TA)6	12	100818	100829
BP	p1	(T)12	12	103580	103591
BP	c	(TTTA)4tttt(TTA)4tat(TTA)4taattatattatttgaattctattatttgaattctattatttttta(TAT)4	105	105559	105663
BP	p1	(T)10	10	109705	109714
BP	c	(A)10tgaaaaggtcgtcttattcaaaaccccaattatgaaatcccttctctcccacttcacacctcggaacgcaccgttcttat(AG)5	100	114779	114878
BP	p1	(T)10	10	118201	118210
BP	p1	(A)15	15	119795	119809
BP	p1	(T)10	10	120119	120128
BP	p1	(T)10	10	120644	120653
BP	c	(TA)5ataatttaaataataatttaaataagaattaatataaaaaaaaatatataattcattttgaataatg(AATA)4	93	121114	121206
BP	c	(T)10gaaaac(A)15gaataataaagcaaagacacgaaatttcac(T)11	72	121387	121458
BP	c	(T)16ctttttccatgaatggaagtcagacctacttacttatttatatatagtat(TA)5gttatacatagtgggggagtttctttgtataagagaagagtataaact(A)10	134	122100	122233
BP	p1	(A)11	11	123476	123486
BP	c	(T)18acttaacttaaatttaagagaataaaaagaacgtttcttttatttataactttataacaattttatttataacaattttaaatt(A)14cataagattagtttttgattg(TTTAT)3	152	123801	123952
BP	p4	(AATA)3	12	124160	124171
BP	p4	(AAAT)3	12	126499	126510
BP	p1	(T)13	13	128158	128170
BP	p1	(A)11	11	129137	129147
BP	p3	(TAT)5	15	129278	129292
BP	c	(AATC)3ttggggtaaccggtctcggtctcgtattcttatgtctctttttgttttacttttgtacataagaaatgagtctcaa(T)10	98	129493	129590
BP	c	(T)10ctttcgaaaaag(A)11	33	129708	129740
BP	c	(AAT)4aaat(A)15	31	131633	131663
BP	p1	(T)11	11	131955	131965
BP	p1	(A)20	20	132263	132282
BP	p1	(T)11	11	133670	133680
BP	p1	(T)10	10	133784	133793
BP	p5	(TTTTC)3	15	134943	134957
BP	p4	(TTCT)3	12	135242	135253
BP	p1	(T)10	10	136227	136236
BP	c	(CT)5ataagaacggtgcgttccgaggtgtgaagtgggagagaagggatttcataattggggttttgaataagacgaccttttca(T)10	100	139505	139604
BP	p1	(A)10	10	144669	144678
BP	c	(AAT)4ataaaaaataatagaattcaaataatagaattcaaataatataatt(ATA)4aat(ATA)4aa(AAAT)4	103	148719	148821
BP	p1	(A)12	12	150792	150803
BP	p2	(AT)6	12	153553	153564
BP	p1	(A)10	10	163003	163012
BS	c	(TA)5tt(TA)9	30	1	30
BS	c	(T)10aatctaacataaaaattttcc(A)13	44	406	449
BS	c	(AATA)3ttactaaaaaaggagcaatacccaatttcttgttctatcaagaagcttggtattgctcccctttttagc(T)11	92	618	709
BS	p2	(TA)5	10	2048	2057
BS	p1	(A)10	10	2161	2170
BS	p3	(TTA)4	12	4006	4017
BS	p1	(A)10	10	4226	4235
BS	c	(AAAT)3aaagagattgaatcgtatgacacaatcaaaacattaaatt(AGAA)3	64	4790	4853
BS	p2	(TA)7	14	5219	5232
BS	p3	(TTA)4	12	5519	5530
BS	p1	(T)12	12	5718	5729
BS	c	(A)14caaaagaattaattcaattcaatttaaccaaaaaaattcactataaactatataaactatatt(A)11taataattaaataataacaaattaaataataac(A)10	131	5940	6070
BS	p1	(A)10	10	7963	7972
BS	p4	(TTAA)3	12	8216	8227
BS	p2	(CT)6	12	9176	9187
BS	p2	(CT)6	12	9461	9472
BS	c	(TA)5c(TA)5	21	9715	9735
BS	p1	(A)11	11	9957	9967
BS	c*	(ATTA)3(ATT)4*ataat(TA)6ttaattaatatatta(ATT)4(TA)6*ttaattaatatatta(ATT)4ata(TAT)5(TA)13*	143	10319	10461
BS	c	(C)10(A)15	25	12186	12210
BS	p1	(A)12	12	12820	12831
BS	c	(TTA)4(T)16atatataaa(AT)9tttatatatttatatattaattttatatattatttatatatattattctttattttattcttctgctcttgtttc(T)13cttgtttttttttagtcatttacctattatttctaatagatcgaactaaacagaataaaaaaaaatgtattcgatttatagtataaatcga(T)10	244	13571	13814
BS	c*	(A)11(AAAT)4*	24	14076	14099
BS	p1	(T)11	11	14731	14741
BS	c	(T)11acaattcgccaatatcgtaagctgttttactattcctctagattgtatagac(T)10ctatttgtgtatatttatgtttactaagtagattctcttgagcaaggcagggattgccttgcattgcactaagct(A)10	158	15542	15699
BS	p1	(A)17	17	17631	17647
BS	p1	(T)11	11	19718	19728
BS	p2	(AT)5	10	21115	21124
BS	c	(T)11acg(T)12	26	23895	23920
BS	p1	(A)11	11	28142	28152
BS	p2	(TA)9	18	28824	28841
BS	c	(A)10(G)11	21	29366	29386
BS	p1	(T)11	11	30334	30344
BS	p1	(T)10	10	30923	30932
BS	p5	(ATTTT)3	15	31385	31399
BS	p5	(CAAAT)3	15	31565	31579
BS	c	(AAT)4attatata(AAT)4	32	33687	33718
BS	p4	(AAAT)3	12	35156	35167
BS	p1	(A)11	11	36042	36052
BS	p4	(ATCT)4	16	36372	36387
BS	p1	(G)11	11	38233	38243
BS	p2	(AT)7	14	39691	39704
BS	c	(ACTAA)3tataataactaatatactaatatattacattactatttataaattata(AT)5	73	40367	40439
BS	c	(A)10tagaaattaaaaaaatgaaattatataaattactatataaattacatataatatatataattatataaact(TA)6ttatt(TA)6	110	40675	40784
BS	p1	(T)11	11	41047	41057
BS	p4	(AAGA)3	12	47944	47955
BS	c	(T)10attagtagattttgc(TCTT)3	37	48260	48296
BS	p1	(A)11	11	49258	49268
BS	p6	(ATAGGT)4	24	49402	49425
BS	p1	(T)11	11	49787	49797
BS	p1	(A)10	10	51282	51291
BS	c	(A)10g(A)11	22	51804	51825
BS	p1	(T)12	12	52633	52644
BS	p1	(T)11	11	53022	53032
BS	c	(T)11c(T)13	25	53521	53545
BS	p1	(T)12	12	54969	54980
BS	p1	(T)11	11	56755	56765
BS	p1	(A)10	10	57477	57486
BS	p1	(A)10	10	60039	60048
BS	p1	(A)11	11	60549	60559
BS	p1	(T)14	14	62885	62898
BS	c	(TA)5t(TA)12(AT)8a(AT)7accaaatatacgtatataccaaatatacgaacaattatc(A)10tgaaactttttttgtccgcaa(T)15	151	66557	66707
BS	p1	(A)11	11	67041	67051
BS	c	(T)12attta(T)11	28	69141	69168
BS	p4	(TTCT)3	12	69781	69792
BS	p1	(A)13	13	69917	69929
BS	c	(TAA)4ttcatgaaagagattatcatattgtcacaattaaattcgatgcgaaatctaaaaatccctccttcgtattcgtagttgtataagaagag(T)10gaatccctttttaaa(T)13	139	71154	71292
BS	p1	(T)12	12	71977	71988
BS	p1	(T)10	10	72667	72676
BS	c	(A)13cgaattggggaataaatc(T)10	41	74906	74946
BS	p1	(T)11	11	75623	75633
BS	p1	(A)10	10	76852	76861
BS	c	(T)11caaat(A)10	26	77078	77103
BS	p1	(A)10	10	77304	77313
BS	p1	(A)10	10	77823	77832
BS	p1	(T)12	12	78173	78184
BS	c	(TA)7tttttatattttatatata(T)12aattt(TA)5	60	80820	80879
BS	p1	(T)13	13	84914	84926
BS	p4	(GGAT)3	12	86591	86602
BS	p1	(T)10	10	86830	86839
BS	p1	(A)17	17	88308	88324
BS	c	(T)12(ATTT)4	28	89093	89120
BS	p1	(T)11	11	89512	89522
BS	p4	(TTTC)3	12	89659	89670
BS	p1	(A)13	13	89927	89939
BS	p1	(A)13	13	90051	90063
BS	p2	(TA)8	16	101151	101166
BS	p1	(T)12	12	103917	103928
BS	c	(TTTA)3(T)12attattattatat(TTA)4taattatattatttgaattctattatttgaattctattatttttta(TAT)4	107	105918	106024
BS	c	(A)12tgaaaaggtcgtcttattcaaaaccccaattatgaaatcccttctctcccacttcacacctcggaacgcaccgttcttat(AG)5	102	115137	115238
BS	p1	(A)10	10	117825	117834
BS	p1	(T)10	10	118596	118605
BS	p1	(A)13	13	120184	120196
BS	c	(T)10aattactttattcaaaatcattaattagttcattttgggattgatttatggtcttgtattcattatgtttgt(A)11	93	120507	120599
BS	c	(T)10gtttattgtttcgtttattggttagtttattgtttatcatattattgtttatcatatta(TATAT)3	84	121287	121370
BS	c	(AT)7aattaattattaataa(AT)5aatt(TA)11t(TA)5a(AT)6aataaataat(A)22tagaattcattttgaataatg(AATA)3taaaataataaatat(A)10	180	121562	121741
BS	c	(T)10gaaaacaaaac(A)10gtgaaatttcgtgtctttgctttattattc(T)14	75	121914	121988
BS	p1	(T)10	10	122706	122715
BS	c	(TA)5aatt(TA)5a(AT)5agatagatatagatagttatatatttatatatagtaggtataatatatagtaggtataataggggagtttctttgtataagagaagagtataaact(A)10	141	122961	123101
BS	p1	(A)10	10	124345	124354
BS	c	(T)12acttaaatttaagagaataaaaagaaagtttcttttatttataactttataacaatttaaaattaaaac(A)11cataagattaggttttgattg(TTTAT)3	128	124677	124804
BS	p4	(AATA)3	12	125012	125023
BS	p1	(T)11	11	129022	129032
BS	p1	(A)10	10	129921	129930
BS	p3	(TAT)4	12	130163	130174
BS	c	(AATC)3ttggggtaaccggtctcggtctcgtattcttatgtctctttttgttttacttttgtacataagaaatgagtctcaa(T)10	98	130377	130474
BS	p1	(A)13	13	132522	132534
BS	p1	(T)10	10	132826	132835
BS	p1	(A)13	13	133154	133166
BS	p1	(T)11	11	134525	134535
BS	p1	(T)10	10	134639	134648
BS	p1	(T)10	10	137049	137058
BS	c	(CT)5ataagaacggtgcgttccgaggtgtgaagtgggagagaagggatttcataattggggttttgaataagacgaccttttca(T)12	102	140361	140462
BS	c*	(AAT)4ataaaaaataatagaattcaaataatagaattcaaataatataatt(ATA)4aat(ATA)4(A)12*(TAAA)3	108	149574	149681
BS	p1	(A)12	12	151671	151682
BS	p2	(AT)8	16	154432	154447
BSa	c	(TA)5tt(TA)9	30	91	120
BSa	c	(T)10aatctaacataaaaattttcc(A)12	43	496	538
BSa	c	(AATA)3ttactaaaaaaggagcaatacccaatttcttgttctatcaagaagcttggtattgctcccctttttagc(T)10	91	707	797
BSa	p2	(TA)5	10	2136	2145
BSa	p1	(A)11	11	2249	2259
BSa	p3	(TTA)4	12	4095	4106
BSa	p1	(A)10	10	4315	4324
BSa	c	(AAAT)3aaagagattgaatcgtatgacacaatcaaaacattaaatt(AGAA)3	64	4879	4942
BSa	p2	(TA)7	14	5300	5313
BSa	p3	(TTA)4	12	5607	5618
BSa	p1	(T)12	12	5805	5816
BSa	c	(A)13caaaagaattaattcaattcaatttaaccaaaaaaattcactataaactatataaactatatt(A)11taataattaaataataacaaattaaataataac(A)10	130	6027	6156
BSa	p1	(A)10	10	8049	8058
BSa	p4	(TTAA)3	12	8302	8313
BSa	p2	(CT)6	12	9262	9273
BSa	p2	(CT)6	12	9547	9558
BSa	c	(TA)5c(TA)5	21	9814	9834
BSa	p1	(A)11	11	10056	10066
BSa	c*	(ATTA)3(ATT)4*ataat(TA)6ttaattaatatatta(ATT)4atata(TAT)5(TA)5*attattat(TA)10ttttttaatttaatttag(TA)10	157	10418	10574
BSa	c	(C)11(A)14	25	12287	12311
BSa	p1	(A)11	11	12921	12931
BSa	c	(TTA)4(T)16atatataaa(AT)9tttatatatttatatattaattttatatattatttatatatattattctttattttattcttctgctcttgtttc(T)13cttgtttttttttagtcatttacctattatttctaatagatcgaactaaacagaataaaaaaaaatgtattcgatttatagtataaatcga(T)10	244	13665	13908
BSa	c*	(A)11(AAAT)4*	24	14170	14193
BSa	p1	(T)11	11	14825	14835
BSa	c	(T)11acaattcgccaatatcgtaagctgttttactattcctctagattgtatagac(T)10ctatttgtgtatatttatgtttactaagtagattctcttgagcaaggcagggattgccttgcattgcactaagct(A)10	158	15636	15793
BSa	p1	(A)17	17	17725	17741
BSa	p1	(T)11	11	19812	19822
BSa	p2	(AT)5	10	21209	21218
BSa	c	(T)10acg(T)12	25	23989	24013
BSa	p1	(A)11	11	28234	28244
BSa	p2	(TA)10	20	28895	28914
BSa	c	(A)10(G)10	20	29439	29458
BSa	p1	(T)11	11	30406	30416
BSa	p1	(T)10	10	30995	31004
BSa	p5	(ATTTT)3	15	31457	31471
BSa	p5	(CAAAT)3	15	31637	31651
BSa	p3	(AAT)4	12	33759	33770
BSa	p4	(AAAT)3	12	35171	35182
BSa	p1	(A)11	11	36057	36067
BSa	p4	(ATCT)4	16	36387	36402
BSa	p1	(G)11	11	38248	38258
BSa	p2	(AT)7	14	39706	39719
BSa	c	(ACTAA)3tataataactaatatactaatatattacattactatttataaattata(AT)5	73	40381	40453
BSa	c	(A)10tagaaattaaaaaaatgaaattatataaattactatataaattacatataatatatataattatataaact(TA)6ttatt(TA)6	110	40689	40798
BSa	p1	(T)11	11	41061	41071
BSa	p4	(AAGA)3	12	47916	47927
BSa	c	(T)10attagtagattttgc(TCTT)3	37	48232	48268
BSa	p1	(A)11	11	49230	49240
BSa	p6	(ATAGGT)4	24	49374	49397
BSa	p1	(T)11	11	49759	49769
BSa	p1	(A)10	10	51254	51263
BSa	c	(A)10g(A)11	22	51776	51797
BSa	p1	(T)12	12	52605	52616
BSa	p1	(T)11	11	52994	53004
BSa	c	(T)11c(T)13	25	53493	53517
BSa	p1	(T)12	12	54941	54952
BSa	p5	(TTTTA)3	15	55782	55796
BSa	p1	(T)11	11	56732	56742
BSa	p1	(A)10	10	57454	57463
BSa	p1	(A)11	11	60010	60020
BSa	p1	(A)10	10	60521	60530
BSa	c	(A)10tgattctcttttgcttttgtaagaacccgaagtattccttcactatatatgaaaatatgaaaatatgaaaaaccactcca(T)14	104	62767	62870
BSa	c	(TA)5t(TA)10(AT)7accaaatatacgtatataccaaatatacgaacaattatc(A)10tgaaactttttttgtccgcaa(T)16	131	66529	66659
BSa	p1	(A)11	11	66993	67003
BSa	p1	(T)10	10	67768	67777
BSa	c	(T)12attta(T)11	28	69094	69121
BSa	p4	(TTCT)3	12	69734	69745
BSa	p1	(A)13	13	69870	69882
BSa	p3	(TAA)4	12	71098	71109
BSa	p1	(T)13	13	71223	71235
BSa	p1	(A)11	11	71711	71721
BSa	p1	(T)12	12	71921	71932
BSa	p1	(T)10	10	72611	72620
BSa	c	(A)13cgaattggggaataaatc(T)10	41	74850	74890
BSa	p1	(T)10	10	75567	75576
BSa	p1	(A)10	10	76795	76804
BSa	c	(T)10caaat(A)10	25	77021	77045
BSa	p1	(A)10	10	77246	77255
BSa	p1	(A)10	10	77765	77774
BSa	p1	(T)12	12	78115	78126
BSa	c	(TA)7tttttatattttatatata(T)12aattt(TA)5tttaatttatatatatttattatatatatttaaattttttaattt(TA)5	115	80762	80876
BSa	p1	(T)13	13	84910	84922
BSa	p4	(GGAT)3	12	86587	86598
BSa	p1	(T)10	10	86826	86835
BSa	p1	(A)17	17	88304	88320
BSa	c	(T)12(ATTT)4	28	89085	89112
BSa	p1	(T)10	10	89504	89513
BSa	p4	(TTTC)3	12	89650	89661
BSa	p1	(A)16	16	89918	89933
BSa	p1	(A)13	13	90045	90057
BSa	p2	(TA)8	16	101145	101160
BSa	p1	(T)12	12	103911	103922
BSa	c	(TTTA)3(T)12attattattatat(TTA)4taattatattatttgaattctattatttgaattctattatttttta(TAT)4	107	105912	106018
BSa	c	(A)12tgaaaaggtcgtcttattcaaaaccccaattatgaaatcccttctctcccacttcacacctcggaacgcaccgttcttat(AG)5	102	115131	115232
BSa	p1	(A)11	11	117819	117829
BSa	p1	(T)10	10	118591	118600
BSa	p1	(A)14	14	120179	120192
BSa	c	(T)10aattactttattcaaaatcattaattagttcattttgggattgatttatggtcttgtattcattatgtttgt(A)11	93	120503	120595
BSa	p1	(T)10	10	120985	120994
BSa	c	(TA)5a(AT)5agatagatatagatagttatatatttatatatagtaggtataatatatagtaggtataataggggagtttctttgtataagagaagagtataaact(A)11	128	121170	121297
BSa	p1	(A)10	10	122541	122550
BSa	c	(T)12acttaaatttaagagaataaaaagaaagtttcttttatttataactttataacaatttaaaattaaaac(A)11cataagattaggttttgattg(TTTAT)3	128	122873	123000
BSa	p4	(AATA)3	12	123208	123219
BSa	p1	(T)11	11	127218	127228
BSa	c	(A)10gaattgggcattcctttagttcatgaattatgatatgaactcgctctctatgaatatggatatagaaaaaaaag(A)10	94	128117	128210
BSa	p3	(TAT)4	12	128360	128371
BSa	c	(AATC)3ttggggtaaccggtctcggtctcgtattcttatgtctctttttgttttacttttgtacataagaaatgagtctcaa(T)10	98	128579	128676
BSa	p1	(A)13	13	130724	130736
BSa	p1	(T)10	10	131028	131037
BSa	p1	(A)13	13	131356	131368
BSa	p1	(T)11	11	132727	132737
BSa	p1	(T)10	10	132841	132850
BSa	p1	(T)10	10	135251	135260
BSa	c	(CT)5ataagaacggtgcgttccgaggtgtgaagtgggagagaagggatttcataattggggttttgaataagacgaccttttca(T)12	102	138563	138664
BSa	c*	(AAT)4ataaaaaataatagaattcaaataatagaattcaaataatataatt(ATA)4aat(ATA)4(A)12*(TAAA)3	108	147776	147883
BSa	p1	(A)12	12	149873	149884
BSa	p2	(TA)8	16	152635	152650
KO	p1	(T)19	19	33	51
KO	p1	(T)10	10	314	323
KO	c	(TA)6atatacgtatatgatttcgtaagatacttataatccgaatgggttgcccgggactcgaacccggaactagtcggatggagtagaaaatttccttgtt(A)12	121	2013	2133
KO	c	(A)11ggatggattcgtattcatatacataaatattatatag(GAA)4	60	3232	3291
KO	p3	(TTA)4	12	3964	3975
KO	p1	(A)10	10	4198	4207
KO	c	(AGAA)3ccaagaaatgaaataatttataatggattctgaacataaaaaaaagatcagctaaaaataaaaataaaagaaattctcaaaaaaatctcaattcaaatag(A)12	124	4819	4942
KO	p2	(TA)7	14	5075	5088
KO	c	(AT)6taataaatatatattaataaataataaatggttttctttattatattaattaaaata(AT)6	81	5380	5460
KO	c	(A)12ggtagtttattttttattta(T)11	43	6236	6278
KO	p2	(CT)5	10	7140	7149
KO	p3	(TAA)4	12	7663	7674
KO	p2	(AT)6	12	8350	8361
KO	c	(AT)6tattataac(AT)7	35	8494	8528
KO	c	(CCT)4cccccccc(A)11	31	10237	10267
KO	c*	(T)11(TTA)4*attttatatattattctttattttattcttctgctcttgtttctttttttcttc(T)13	88	11638	11725
KO	c	(A)10ctaaataaaaaattatagtcgtgaaatcgtgatataatttgaaaaagcaagcagcaaatccaaggtaataaaaaaaatatgta(T)10	103	12094	12196
KO	p1	(T)10	10	12731	12740
KO	p2	(TA)6	12	13050	13061
KO	p1	(A)10	10	13317	13326
KO	p1	(A)12	12	15641	15652
KO	p1	(T)11	11	17729	17739
KO	p2	(AT)5	10	19126	19135
KO	p2	(AT)5	10	27927	27936
KO	p1	(T)10	10	28417	28426
KO	p1	(T)11	11	28700	28710
KO	p1	(T)10	10	28988	28997
KO	p5	(ATTTT)3	15	29471	29485
KO	p5	(CAAAT)3	15	29697	29711
KO	p1	(A)10	10	30603	30612
KO	c	(TTTA)3ttattatataagatat(TTTA)3	40	31879	31918
KO	p1	(T)15	15	32598	32612
KO	c	(TAAAA)3ttctagtaattatataatttatttataataaatataaaaataattataataaattaatttaattataataaatataaaaataattataataaataatt(ATA)4	125	33127	33251
KO	p4	(ATTA)3	12	33382	33393
KO	p1	(A)10	10	34637	34646
KO	p1	(T)10	10	38296	38305
KO	p5	(ACTAA)3	15	38924	38938
KO	c	(A)10tataaattaaaaaaatgaaata(AT)5	42	39332	39373
KO	p1	(A)11	11	46082	46092
KO	p1	(T)10	10	46417	46426
KO	p4	(TCTT)3	12	46979	46990
KO	c	(AT)6tatttta(AT)6t(ATA)4aattatataatactaatagtaaataatatgttattagaatagtctagtttattaaatagataatatatattaaaata(AT)5taataacttatataaacttatattataatattatataat(TA)6	182	48371	48552
KO	p2	(TA)5	10	48712	48721
KO	p1	(T)10	10	49111	49120
KO	p1	(T)10	10	50210	50219
KO	p1	(A)12	12	50563	50574
KO	p2	(AT)6	12	50893	50904
KO	p1	(A)10	10	51703	51712
KO	p1	(T)12	12	51830	51841
KO	p1	(T)10	10	51989	51998
KO	p1	(T)13	13	52756	52768
KO	p1	(T)10	10	54177	54186
KO	p1	(T)10	10	56089	56098
KO	p2	(AT)5	10	59412	59421
KO	p3	(AAT)4	12	59675	59686
KO	p1	(A)12	12	59988	59999
KO	c	(A)12ttgaaaatgtggtatttcgtatatagtgaagtcatacttctatagtgaagtcatacttcgggttcttacaaaagcaaaagaaatca(T)10	108	62283	62390
KO	p1	(T)12	12	64248	64259
KO	p5	(TGTAT)3	15	64401	64415
KO	c	(TA)8tcaaatatacaaacaattataaaaaaaataaaactttttttgtccacaa(T)13	78	66087	66164
KO	p1	(A)11	11	66496	66506
KO	c	(T)10ctatttattttttttataccagatttggggaattacttgtaccgcatttctagtcatagtatagatattggtaaaaagacgagttgaatttatcccctcc(T)10	120	68477	68596
KO	c	(A)12tggattca(T)12	32	69358	69389
KO	c	(T)10gaatccc(T)11a(T)10	39	70747	70785
KO	p1	(A)10	10	71274	71283
KO	p4	(ATTT)4	16	71489	71504
KO	p1	(A)10	10	71670	71679
KO	p1	(T)11	11	72339	72349
KO	c	(TA)5atc(TA)7atctatggaaatatg(A)11tagaaaacccaccctaaatttcataaatactcgggcggaaagggacatatttca(T)11	118	72717	72834
KO	p4	(TTCC)3	12	73541	73552
KO	p1	(T)11	11	73992	74002
KO	p1	(A)10	10	74452	74461
KO	p1	(T)12	12	75185	75196
KO	c	(T)11caaataaaaa(AAT)4gaaaaaagaatagaatcttgtttttttcgtactctttgataatataaataatgttaaagataatataaataatgttaaaagccctctagtgtaaaaac(A)10	141	76656	76796
KO	p1	(T)12	12	77743	77754
KO	p3	(AAT)5	15	78514	78528
KO	p1	(T)10	10	80365	80374
KO	p1	(T)11	11	81957	81967
KO	p1	(A)10	10	82942	82951
KO	p1	(A)10	10	83623	83632
KO	p1	(T)12	12	86205	86216
KO	c	(T)10c(T)10	21	86747	86767
KO	p1	(A)12	12	87916	87927
KO	c	(ATTT)3ac(TATT)3	26	88611	88636
KO	p4	(TATT)3	12	88788	88799
KO	p4	(TTTC)3	12	89681	89692
KO	c	(T)17aata(T)17	38	91326	91363
KO	p1	(T)10	10	91685	91694
KO	c	(TA)5ttatatata(AT)5	29	101137	101165
KO	p1	(T)12	12	103905	103916
KO	c	(T)10caagtttgaatttgttcatttggaatctgggctcttctacttcatt(TTTA)4att(TTTA)3tttt(TTA)4tat(TTA)4taattatattattataatta(TAT)4	150	105830	105979
KO	p5	(GCAAT)3	15	106759	106773
KO	c	(A)11tgaaaaggtcgtcttattcaaaaccccaattatgaagtcccttctctcccacttcacacctcggaacgcaccgttctgct(AG)5	101	115147	115247
KO	p2	(AT)9	18	117923	117940
KO	p1	(T)10	10	118214	118223
KO	c	(T)12acttaaatttaagagaataaaaagaaagtttcttttatttataactttataacaattttaaattaaaaatttaaatt(A)11cataagattagtttttaattg(TTTAT)3	136	120568	120703
KO	p4	(AATA)3	12	120911	120922
KO	p1	(T)10	10	122588	122597
KO	p4	(AAAT)3	12	123237	123248
KO	p1	(T)13	13	124981	124993
KO	p1	(A)10	10	125983	125992
KO	p4	(AATC)3	12	126358	126369
KO	p1	(A)10	10	128496	128505
KO	c	(T)12aatattttaataaaattattattgatgaatattttattgatcag(TAA)4	68	128797	128864
KO	c	(T)12attcggctagagatacaaaaggatcatatatttcttggtttacaaaagagaaaaattgatatct(A)14	90	128997	129086
KO	p1	(T)11	11	130423	130433
KO	p1	(T)10	10	133621	133630
KO	c	(CT)5agcagaacggtgcgttccgaggtgtgaagtgggagagaagggacttcataattggggttttgaataagacgaccttttca(T)11	101	136235	136335
KO	p5	(CATTG)3	15	144708	144722
KO	c	(ATA)4taattataataatataatt(ATA)4aat(ATA)4aa(AAAT)3aaaaat(TAAA)4aatgaagtagaagagcccagattccaaatgaacaaattcaaacttg(A)10	150	145503	145652
KO	p1	(A)12	12	147566	147577
KO	c	(TA)5ttatatata(AT)5	29	150316	150344
KO	p1	(A)10	10	159788	159797
KO	c	(A)17tatt(A)17	38	160119	160156
RL	p3	(ATA)5	15	99	113
RL	c	(T)11aatctaacataataactttacaaaaaaaagatt(A)10caaaagattgaaaagaagatatagaaattcaaaattagtacataaaacaaatataatactgaatcagaaacgaatatctaaaaatactttttatta(T)12cttatttcttatgttgaagtaaag(A)10	196	522	717
RL	p1	(T)21	21	848	868
RL	p3	(TTA)4	12	4041	4052
RL	p1	(A)10	10	4301	4310
RL	p1	(A)12	12	5144	5155
RL	c	(AT)6ag(AT)6	26	5317	5342
RL	p1	(A)13	13	6180	6192
RL	p1	(A)12	12	6566	6577
RL	p1	(T)11	11	7727	7737
RL	p1	(T)10	10	8293	8302
RL	p1	(T)16	16	9086	9101
RL	c	(T)11atttttatatattctatatttatatattctatattattgttattttattatttaattttattatttaatttga(ATTT)3tatttatttttatttaatttga(ATTT)3tattta(T)10a(T)21	168	11099	11266
RL	c	(C)10(A)12	22	12914	12935
RL	p1	(A)10	10	13550	13559
RL	p1	(T)12	12	14009	14020
RL	c	(TTA)5tttttatttgttattattattttta(T)14atttgttattattttttttatatattattctttattttattcttctgctcttgtttc(T)10cttg(T)10	135	14291	14425
RL	p1	(T)11	11	14531	14541
RL	p1	(G)11	11	14683	14693
RL	c	(TAAA)3aaataaaattataggagtgaaatcttgatataatttgaaaaagcaagcagcaaatccaaggtaat(A)10	87	14840	14926
RL	p6	(AATTAA)3	18	15317	15334
RL	p1	(T)15	15	15473	15487
RL	p2	(TA)6	12	15752	15763
RL	p1	(T)10	10	16264	16273
RL	p1	(A)17	17	18334	18350
RL	p1	(T)11	11	20412	20422
RL	p2	(AT)5	10	21803	21812
RL	p5	(TATAG)3	15	24390	24404
RL	c	(A)11ctactccttactcaagttcccaataaagaccaaacaccatttcattgattcagtcttttttacg(T)13	88	24518	24605
RL	p1	(A)15	15	28827	28841
RL	p1	(A)11	11	29301	29311
RL	p1	(T)11	11	31130	31140
RL	p5	(CAAAT)3	15	32046	32060
RL	p1	(T)13	13	32337	32349
RL	p1	(A)13	13	33488	33500
RL	c	(AAT)4ataaatataaaataaaatata(AAT)4ataaatataaaataaaatataaataattaatataaatataaaataaaatata(AAT)4	109	34331	34439
RL	p1	(T)10	10	34613	34622
RL	p2	(AT)5	10	35177	35186
RL	p3	(AAT)4	12	35653	35664
RL	p5	(ATATA)3	15	36134	36148
RL	p5	(TTATA)3	15	36278	36292
RL	p1	(A)11	11	36809	36819
RL	p1	(G)11	11	38948	38958
RL	p2	(AT)5	10	40288	40297
RL	p1	(T)10	10	40458	40467
RL	p1	(A)11	11	40828	40838
RL	p5	(TAATA)3	15	41094	41108
RL	p1	(A)11	11	42042	42052
RL	p1	(A)10	10	42317	42326
RL	c	(T)11attagtagattttgc(TCTT)3	38	49088	49125
RL	p1	(A)12	12	50528	50539
RL	p1	(T)13	13	51727	51739
RL	p1	(A)13	13	52074	52086
RL	c	(A)11g(A)10	22	52559	52580
RL	p1	(A)10	10	52799	52808
RL	p1	(T)17	17	53385	53401
RL	p1	(T)11	11	53518	53528
RL	p1	(T)11	11	54266	54276
RL	p1	(T)16	16	55696	55711
RL	p1	(T)10	10	56220	56229
RL	p1	(T)11	11	57819	57829
RL	p1	(A)11	11	60876	60886
RL	p1	(A)10	10	61395	61404
RL	p1	(T)11	11	63699	63709
RL	p4	(ATTT)3	12	63828	63839
RL	p1	(T)10	10	65714	65723
RL	c	(TA)5ccaaatatacgaacaattat(A)10c(T)10gtccgcaa(T)11	70	67392	67461
RL	p1	(A)11	11	67806	67816
RL	c	(T)11c(T)14	26	69916	69941
RL	p1	(T)10	10	70236	70245
RL	p1	(T)10	10	70795	70804
RL	p1	(A)10	10	71321	71330
RL	c	(T)11cttgtcgcggtaaaaccgtgtaccataaatcaggtaaaatgagaatttgatggtttgctttt(TAA)4ataattcatgaaagagattatcatattgtcacaattcaattcgatgggaaatctaaaaatccctccttcgtagttgtataaaatataagaagag(T)10	189	71879	72067
RL	c	(A)10gtaacaaaaaagtaaaaagtaaaggataaataaaggatattataaagaaaaatagggatcactttttgttcgaaaat(A)17	104	72537	72640
RL	c	(TA)5atatatgatatatgaaaatatgaaaaatatgaaaatatg(A)10tattctatgaaaaaatattctatgaaaaaaatattgatatatgaaaaaaaatatggaaatatg(A)15	137	74137	74273
RL	c	(A)12cgaattggggaagacgaataaatc(T)11	47	75948	75994
RL	p1	(T)11	11	76685	76695
RL	p1	(T)10	10	77307	77316
RL	p1	(A)11	11	78215	78225
RL	p1	(A)10	10	78429	78438
RL	p1	(T)14	14	79284	79297
RL	p6	(GATATG)3	18	79816	79833
RL	p1	(A)10	10	79949	79958
RL	c	(ATAA)3taatataaataaaggggagtccg(C)10	45	80082	80126
RL	c	(T)13attttata(T)10attttatatatatttatttatatatatt(TA)5ttattatatattttattatattaatattt(TA)5t(TA)5	119	81992	82110
RL	c	(A)11gaataagacatgtatttggatctttctcttcaactttcatttcaactcc(A)16	76	84594	84669
RL	p1	(T)10	10	88104	88113
RL	p4	(TTTA)3	12	90061	90072
RL	p1	(T)11	11	91025	91035
RL	p1	(T)14	14	92646	92659
RL	p2	(TA)6	12	102064	102075
RL	p1	(T)11	11	104868	104878
RL	c*	(T)10(TTA)4*tat(TTA)4	35	106867	106901
RL	p5	(GCAAT)3	15	107689	107703
RL	c	(A)11tgaaaaggtcgtcttattcaaaaccccaattatgaaatcccttctctcccacttcacacctcggaacgcaccgttcttatagtcttat(AG)5	109	116084	116192
RL	p4	(AAAG)3	12	120440	120451
RL	p5	(AGAAA)3	15	120725	120739
RL	p1	(A)10	10	121857	121866
RL	p1	(A)11	11	121970	121980
RL	p1	(T)15	15	123331	123345
RL	p1	(T)16	16	123926	123941
RL	p1	(T)12	12	125826	125837
RL	p4	(GATT)3	12	126072	126083
RL	p3	(ATA)4	12	126281	126292
RL	c	(T)12c(T)10	23	126423	126445
RL	p4	(TATT)3	12	131399	131410
RL	c	(ATAAA)3caatcaaaaatgaatcttatg(T)14	50	131618	131667
RL	p1	(A)12	12	132848	132859
RL	c	(T)10agtttatactcttctcttatacaaaaaaactctcgtactatatatattattaatatactatatattatatagc(AT)5tatgtactatatagc(AT)7aatataaataaattatatgaatatatataaataaattatataaataggtctgacttcaatccatggaaaaaac(A)15	210	133273	133482
RL	p1	(T)14	14	134126	134139
RL	c	(T)11atattttctatttattattttctattttatttattattttctatttattaaaaattatttctaatttctattttatttctat(TA)5ttttatatatattctatatatatttatcatggtatttttatcatggtatttatatatatt(TA)5tt(TA)7atatataa(AT)5aatatatataaataatttattaaataattcatattatatataatatatagaatatgataaacatataatatgataaccaataaactaaccaat(A)11	311	134284	134594
RL	c	(A)13ttgttctttaagtattttattcattatctattga(T)10	57	134860	134916
RL	p1	(T)11	11	135220	135230
RL	c	(A)10ttattcttattaaaaatcaaatactagttttgctataattctttatcctttttctatgtat(TA)7	85	135356	135440
RL	p1	(T)14	14	135647	135660
RL	c	(CT)5ataagactataagaacggtgcgttccgaggtgtgaagtgggagagaagggatttcataattggggttttgaataagacgaccttttca(T)11	109	140566	140674
RL	p5	(CATTG)3	15	149054	149068
RL	c*	(ATA)4aat(ATA)4(A)10*	36	149856	149891
RL	p1	(A)11	11	151880	151890
RL	p2	(AT)6	12	154682	154693
RL	p1	(A)14	14	164099	164112
RS	p3	(ATA)5	15	22	36
RS	c	(T)11aatctaacataataactttacaaaaaaaagatt(A)10caaaagattgaaaagaagatatagaaattcaaaattagtacataaaacaaatataatactgaatcagaaacgaatatctaaaaatactttttatta(T)12cttatttcttatgttgaagtaaag(A)10	196	445	640
RS	p1	(T)21	21	771	791
RS	p3	(TTA)4	12	3964	3975
RS	p1	(A)10	10	4224	4233
RS	p1	(A)12	12	5067	5078
RS	c	(AT)6ag(AT)6	26	5240	5265
RS	p1	(A)13	13	6145	6157
RS	p1	(A)12	12	6531	6542
RS	p1	(T)11	11	7692	7702
RS	p1	(T)10	10	8258	8267
RS	p1	(T)16	16	9051	9066
RS	c	(T)11atttttatatattctatatttatatattctatattattgttattttattatttaattttattatttaatttga(ATTT)3tatttatttttatttaatttga(ATTT)3tatttata(T)10a(T)19	168	11064	11231
RS	c	(C)10(A)12	22	12879	12900
RS	p1	(A)10	10	13515	13524
RS	p1	(T)12	12	13974	13985
RS	c	(TTA)5tttttatttgttattattattttta(T)14atttgttattattttttttatatattattctttattttattcttctgctcttgtttc(T)10cttg(T)10	135	14256	14390
RS	p1	(T)11	11	14496	14506
RS	p1	(G)11	11	14648	14658
RS	c	(TAAA)3aaataaaattataggagtgaaatcttgatataatttgaaaaagcaagcagcaaatccaaggtaat(A)10	87	14805	14891
RS	p6	(AATTAA)3	18	15282	15299
RS	p1	(T)15	15	15438	15452
RS	p2	(TA)6	12	15717	15728
RS	p1	(T)10	10	16229	16238
RS	p1	(A)17	17	18299	18315
RS	p1	(T)11	11	20377	20387
RS	p2	(AT)5	10	21768	21777
RS	p5	(TATAG)3	15	24355	24369
RS	c	(A)11ctactccttactcaagttcccaataaagaccaaacaccatttcattgattcagtcttttttacg(T)13	88	24483	24570
RS	p1	(A)15	15	28792	28806
RS	p1	(A)11	11	29266	29276
RS	p1	(T)11	11	31095	31105
RS	p5	(CAAAT)3	15	32011	32025
RS	p1	(T)13	13	32302	32314
RS	p1	(A)13	13	33453	33465
RS	c	(AAT)4ataaatataaaataaaatata(AAT)4ataaatataaaataaaatataaataattaatataaatataaaataaaatata(AAT)4	109	34296	34404
RS	p1	(T)10	10	34559	34568
RS	p2	(AT)5	10	35123	35132
RS	p3	(AAT)4	12	35599	35610
RS	p5	(ATATA)3	15	36080	36094
RS	p5	(TTATA)3	15	36224	36238
RS	p1	(A)11	11	36755	36765
RS	p1	(G)11	11	38894	38904
RS	p2	(AT)5	10	40234	40243
RS	p1	(T)10	10	40404	40413
RS	p1	(A)11	11	40774	40784
RS	p5	(TAATA)3	15	41040	41054
RS	p1	(A)11	11	41988	41998
RS	p1	(A)10	10	42263	42272
RS	c	(T)11attagtagattttgc(TCTT)3	38	49034	49071
RS	p1	(A)12	12	50474	50485
RS	p1	(T)13	13	51673	51685
RS	p1	(A)13	13	52020	52032
RS	c	(A)11g(A)10	22	52505	52526
RS	p1	(A)10	10	52745	52754
RS	p1	(T)17	17	53331	53347
RS	p1	(T)11	11	53464	53474
RS	p1	(T)11	11	54212	54222
RS	p1	(T)16	16	55642	55657
RS	p1	(T)10	10	56166	56175
RS	p1	(T)11	11	57969	57979
RS	p1	(A)11	11	61026	61036
RS	p1	(A)10	10	61545	61554
RS	p1	(T)11	11	63849	63859
RS	p4	(ATTT)3	12	63978	63989
RS	p1	(T)10	10	65864	65873
RS	c	(TA)5ccaaatatacgaacaattat(A)10c(T)10gtccgcaa(T)11	70	67542	67611
RS	p1	(A)11	11	67956	67966
RS	c	(T)11c(T)14	26	70066	70091
RS	p1	(T)10	10	70386	70395
RS	p1	(T)10	10	70945	70954
RS	p1	(A)10	10	71471	71480
RS	c	(T)11cttgtcgcggtaaaaccgtgtaccataaatcaggtaaaatgagaatttgatggtttgctttt(TAA)4ataattcatgaaagagattatcatattgtcacaattcaattcgatgggaaatctaaaaatccctccttcgtagttgtataaaatataagaagag(T)10	189	72029	72217
RS	c	(A)10gtaacaaaaaagtaaaaagtaaaggataaataaaggatattataaagaaaaatagggatcactttttgttcgaaaat(A)17	104	72687	72790
RS	c	(TA)5atatatgatatatgaaaatatgaaaaatatgaaaatatg(A)10tattctatgaaaaaatattctatgaaaaaaatattgatatatgaaaaaaaatatggaaatatg(A)15	137	74287	74423
RS	c	(A)12cgaattggggaagacgaataaatc(T)11	47	76098	76144
RS	p1	(T)11	11	76835	76845
RS	p1	(T)10	10	77457	77466
RS	p1	(A)11	11	78365	78375
RS	p1	(A)10	10	78579	78588
RS	p1	(T)14	14	79434	79447
RS	p6	(GATATG)3	18	79966	79983
RS	p1	(A)10	10	80099	80108
RS	c	(ATAA)3taatataaataaaggggagtccg(C)10	45	80232	80276
RS	c	(T)13attttata(T)10attttatatatatttatttatatatatt(TA)5ttattatatattttattatattaatattt(TA)5t(TA)5	119	82142	82260
RS	c	(A)11gaataagacatgtatttggatctttctcttcaactttcatttcaactcc(A)16	76	84744	84819
RS	p1	(T)10	10	88254	88263
RS	p4	(TTTA)3	12	90211	90222
RS	p1	(T)11	11	91175	91185
RS	p1	(T)14	14	92796	92809
RS	p2	(TA)6	12	102214	102225
RS	p1	(T)11	11	105018	105028
RS	c*	(T)10(TTA)4*tat(TTA)4	35	107017	107051
RS	p5	(GCAAT)3	15	107839	107853
RS	c	(A)11tgaaaaggtcgtcttattcaaaaccccaattatgaaatcccttctctcccacttcacacctcggaacgcaccgttcttatagtcttat(AG)5	109	116234	116342
RS	p1	(A)14	14	121248	121261
RS	c	(TA)7atacatagaaaaaggataaagaattatagcaaaactagtatttgatttttaataagaataa(T)10	85	121468	121552
RS	p1	(A)11	11	121678	121688
RS	c	(A)10tcaatagataatgaataaaatacttaaagaacaa(T)13	57	121992	122048
RS	c	(T)11attggttagtttattggttatcatattatatgtttatcatattctatatattatatataatatgaattatttaataaattatttatatatat(TA)5tttatatat(TA)7a(AT)5aaatatatataaataccatgataaaaataccatgataaatatatatagaatatatataaa(AT)5aatagaaataaaatagaaattagaaataatttttaataaatagaaaataataaataaaatagaaaataataaatagaaaatat(A)11	311	122314	122624
RS	p1	(A)14	14	122769	122782
RS	c	(T)15gttttttccatggattgaagtcagacctatttatataatttatttatatatattcatataatttatttatat(TA)7tgctatatagtacata(AT)5gctatataatatatagtatattaataatatatatagtacgagagtttttttgtataagagaagagtataaact(A)10	210	123426	123635
RS	p1	(T)12	12	124049	124060
RS	c	(A)14cataagattcatttttgattg(TTTAT)3	50	125241	125290
RS	p4	(AATA)3	12	125498	125509
RS	c	(A)10g(A)12	23	130463	130485
RS	p3	(TAT)4	12	130616	130627
RS	p4	(AATC)3	12	130825	130836
RS	p1	(A)12	12	131071	131082
RS	p1	(A)16	16	132967	132982
RS	p1	(A)15	15	133563	133577
RS	p1	(T)11	11	134928	134938
RS	p1	(T)10	10	135042	135051
RS	p5	(TTTTC)3	15	136168	136182
RS	p4	(TTCT)3	12	136455	136466
RS	c	(CT)5ataagactataagaacggtgcgttccgaggtgtgaagtgggagagaagggatttcataattggggttttgaataagacgaccttttca(T)11	109	140716	140824
RS	p5	(CATTG)3	15	149204	149218
RS	c*	(ATA)4aat(ATA)4(A)10*	36	150006	150041
RS	p1	(A)11	11	152030	152040
RS	p2	(AT)6	12	154832	154843
RS	p1	(A)14	14	164249	164262
Notes.
BC: B. cylindrica (MW836110); BG: B. gymnorhiza (MW836111); BH: B. hainesii (MW836112); BP: B. parviflora (MW836113); BS: B. sexangula (MW836114)
BSa: B. sexangula (CNA0003536); KO: Kandelia obavata (MH277332); RL: Rhizophora x lamarckii (NC_046517); RS: Rhizophora stylosa (MK070169)
