# Supplementary material for: Complete chloroplast genome sequences of five Bruguiera species (Rhizophoraceae): comparative analysis and phylogenetic relationships
Source: PeerJ. 2021 Oct 22;9:e12268. doi: 10.7717/peerj.12268 (PMC8544253; doi:10.7717/peerj.12268)
Supplement: Supplemental Information 10 [file peerj-09-12268-s010.xlsx]

## Sheet: TS10
Table S10. Shared compound and interrupted SSR loci with ≤100 bp among five Bruguiera species.
Compound SSR	Size	Species (start SSR locus)	Genome region
(A)10(G)11	21	BG (32402), BS (29366)	non-coding
(TA)5c(TA)5	21	BC (9927), BH (9918), BS (9715), Bsa (9814)	non-coding
(T)10ataa(T)10	24	BC (41270) , BH (41260)	non-coding
(T)15(TTTA)3	24	BC (89405), BH (89394)	intron rpl16
(TAA)4(A)14	24	BC (120460), BH (120449)	non-coding
(C)10(A)15	25	BC (12238), BH (12229), BS (12186)	non-coding
(T)10c(T)14	25	BC (53682), BH (53672)	non-coding
(A)15g(A)12	28	BC (51954), BH (51944)	non-coding
(TA)5tt(TA)9	30	BG (161165), BS (1), Bsa (91)	rps19
(AAT)4attatata(AAT)4	32	BG (33636), BS (33687)	non-coding
(T)10attagtaaattttgc(TCTT)3	37	BC (48430), BH (48420)	intron ycf3
(T)10attagtagattttgc(TCTT)3	37	BG (48265), BS (48260), Bsa (48232)	intron ycf3
(TC)6tatatatatttaattt(TA)5	38	BC (81063), BH (81052)	non-coding
(A)11tcaatgtgtagcttccagccctcc(T)10	45	BC (78073), BH (78062)	non-coding
(GGAT)3atatccatttcatgtcaaaatagacc(T)10	48	BG (86508), BP (86317)	non-coding
(A)16gaaatattgtttgtcc(A)17	49	BC (88602), BH (88591)	non-coding
(AAAT)3aaagagattgaatcgtatgacacaatcaaaacattaaatt(AGAA)3	64	BC (4856), BG (4762), BH (4847), BP (4813), BS (4790), Bsa (4879)	non-coding
(AT)9aataaa(AT)5aataaaaaatataataat(A)15	67	BC (122008), BH (121997)	non-coding
(ACTAA)3tataataactaatatactaatatattacattactatttataaattata(AT)5	73	BG (40305), BS (40367), Bsa (40381)	non-coding
(TA)5atatacgaacaattatc(A)11tgaaactttttttgtccgcaa(T)14	73	BC (66839), BH (66829)	non-coding
(A)12ttctttttatcccccaatcccgagagaaaggtctttatttgattaaaagtttccta(T)10	78	BC (49890), BH (49880)	non-coding
(ACTAA)3tataataactaatatactaatatattacattactatttataaatg(TATAAA)3	78	BC (40624), BH (40614)	non-coding
(A)11ggtttgtgagatatatttttatctatttttttaatagacttcctatcatatatc(ATATA)3	80	BC (28689), BH (28680)	non-coding
(A)12caaaagaattaatttaattcaatttaaccaaaaaaattcactataaactatataaactatattaaaaaa(AAT)4	93	BC (6061), BH (6052)	non-coding
(T)10aattactttattcaaaatcattaattagttcattttgggattgatttatggtcttgtattcattatgtttgt(A)11	93	BC (120804), BH (120793), BS (120507), Bsa (120503)	non-coding
(AATA)3ttactaaaaaaggagcaatacccaatttcttgttctatcaagaagcttggtattgctcccctttttagc(T)14	95	BC (623), BG (587), BH (614)	non-coding
(AATC)3ttggggtaaccggtctcggtctcgtattcttatgtctctttttgttttacttttgtacataagaaatgagtctcaa(T)10	98	BC (130576), BG (127403), BH (130565), BP (129493), BS (130377), Bsa (128579)	intron ndhA
(A)10tggattcattttttcatttatatatttctatgaataaagtattatgattattaagaactcaacggagtaccccccccc(T)11	99	BC (70122), BH (70112)	non-coding
(A)10ggattctcttttgcttttgtaagaacccgaagtattccttcactatatatgaaaatatgaaaaaccactcca(T)18	100	BC (63049), BH (63039)	non-coding
Notes.
BC: B. cylindrica (MW836110); BG: B. gymnorhiza (MW836111); BH: B. hainesii (MW836112); BP: B. parviflora (MW836113); BS: B. sexangula (MW836114)
BSa: B. sexangula (CNS0105404)
