# Supplementary material for: Complete chloroplast genome sequences of five Bruguiera species (Rhizophoraceae): comparative analysis and phylogenetic relationships
Source: PeerJ. 2021 Oct 22;9:e12268. doi: 10.7717/peerj.12268 (PMC8544253; doi:10.7717/peerj.12268)
Supplement: Supplemental Information 11 [file peerj-09-12268-s011.xlsx]

## Sheet: TS11
Table S11. Ka/Ks values between Bruguiera species and assumed ancestors.
Notes. BC, BG, BH, BP, BS, AC, CE, EN, PY and VR represent Bruguiera cylindrica, B. gymnorhiza, B. hainesii, B. parviflora, B. sexangula, Averrhoa carambola, Ctenolophon englerianus, Erythroxylum novogranatense, Pellacalyx yunnanensis and Vitis rotundifolia, respectively.
Gene name	Paired species	Method	Ka	Ks	Ka/Ks	P-Value(Fisher)	Length	Substitutions	S-Substitutions	N-Substitutions	Divergence-Time	Substitution-Rate-Ratio(rTC:rAG:rTA:rCG:rTG:rCA/rCA)
rps7	BP-VR	MA	0.0315062	0.018652	1.68916	0.466218	456	12	1.85983	10.1402	0.0284658	7.5011:0.677597:0.738628:0.810318:3.10145:1
rps7	BC-VR	MA	0.0326996	0.0206639	1.58245	0.464987	456	13	1.92212	11.0779	0.0301068	5.0092:1.40093:1.34871:1.67367:2.71163:1
rps7	BH-VR	MA	0.0326996	0.0206639	1.58245	0.464987	456	13	1.92212	11.0779	0.0301068	5.0092:1.40093:1.34871:1.67367:2.71163:1
rps7	BG-VR	MA	0.0303374	0.0198844	1.52568	0.699448	456	12	1.86434	10.1357	0.0280468	5.3604:0.677872:1.04133:1.41801:3.00244:1
rps7	BS-VR	MA	0.0303374	0.0198844	1.52568	0.699448	456	12	1.86434	10.1357	0.0280468	5.3604:0.677872:1.04133:1.41801:3.00244:1
rpl36	BC-EN	MA	0.0688615	0.062386	1.1038	0.90768	111	7	1.51559	5.48441	0.0673479	2.97319:2.77066:1.75309:1.74101:0.284668:1
rpl36	BG-EN	MA	0.0688615	0.062386	1.1038	0.90768	111	7	1.51559	5.48441	0.0673479	2.97319:2.77066:1.75309:1.74101:0.284668:1
rpl36	BH-EN	MA	0.0688615	0.062386	1.1038	0.90768	111	7	1.51559	5.48441	0.0673479	2.97319:2.77066:1.75309:1.74101:0.284668:1
rpl36	BS-EN	MA	0.0688615	0.062386	1.1038	0.90768	111	7	1.51559	5.48441	0.0673479	2.97319:2.77066:1.75309:1.74101:0.284668:1
psbF	BG-VR	MA	1.0113	0.96441	1.04862	0.726142	57	42	9.76006	32.2399	1	2.37399:2.18299:3.66444:3.66486:20.1519:1
rps7	BP-AC	MA	0.0308474	0.029723	1.03783	0.727044	456	13	3.07549	9.92451	0.0305737	6.49:1.38772:0.854473:0.883698:0.76236:1
rps7	BP-CE	MA	0.0379823	0.0385018	0.986505	0.992315	456	16	3.82991	12.1701	0.0381054	9.12005:2.02938:0.970925:1.07351:3.07638:1
rps7	BC-AC	MA	0.0321998	0.0328216	0.981056	0.725644	456	14	3.12405	10.876	0.0323365	4.15736:1.95983:1.51133:1.61623:0.664784:1
rps7	BH-AC	MA	0.0321998	0.0328216	0.981056	0.725644	456	14	3.12405	10.876	0.0323365	4.15736:1.95983:1.51133:1.61623:0.664784:1
rps7	BC-CE	MA	0.0394771	0.0415118	0.950985	0.99117	456	17	3.85777	13.1422	0.0399211	6.59688:2.67631:1.90967:2.31851:2.6742:1
rps7	BH-CE	MA	0.0394771	0.0415118	0.950985	0.99117	456	17	3.85777	13.1422	0.0399211	6.59688:2.67631:1.90967:2.31851:2.6742:1
rps7	BC-EN	MA	0.0337327	0.0355715	0.948306	0.727398	456	15	3.21939	11.7806	0.0341111	2.18389:2.45442:2.01884:2.17275:0.515149:1
rps7	BH-EN	MA	0.0337327	0.0355715	0.948306	0.727398	456	15	3.21939	11.7806	0.0341111	2.18389:2.45442:2.01884:2.17275:0.515149:1
psaA	BH-EN	MA	0.987554	1.04651	0.943661	0.0646227	2148	1571	347.049	1223.95	1	1.35848:1.4162:1.29776:1.33745:1.34519:1
rps7	BP-EN	MA	0.0336398	0.0359007	0.937024	0.726222	456	15	3.21284	11.7872	0.0340998	1.68085:1.79777:1.47137:1.62373:0.707691:1
rps7	BG-AC	MA	0.0296478	0.0319412	0.928198	0.720173	456	13	3.11843	9.88157	0.0301674	4.37979:1.31848:1.167:1.29864:0.718356:1
rps7	BS-AC	MA	0.0296478	0.0319412	0.928198	0.720173	456	13	3.11843	9.88157	0.0301674	4.37979:1.31848:1.167:1.29864:0.718356:1
rps7	BG-CE	MA	0.0369706	0.0404505	0.913971	0.751576	456	16	3.8034	12.1966	0.0377424	6.85565:1.94497:1.42764:1.89595:2.92549:1
rps7	BS-CE	MA	0.0369706	0.0404505	0.913971	0.751576	456	16	3.8034	12.1966	0.0377424	6.85565:1.94497:1.42764:1.89595:2.92549:1
ccsA	BP-CE	MA	0.980996	1.08499	0.90415	0.204625	480	329	65.2289	263.771	1	0.818882:1.13752:1.23739:1.2613:1.52435:1
ccsA	BS-CE	MA	0.974866	1.11826	0.87177	0.0910492	480	331	64.8794	266.121	1	0.865657:1.11483:1.3026:1.33599:1.88064:1
ccsA	BG-CE	MA	0.974536	1.1194	0.870584	0.0920067	480	330	64.9305	265.07	1	0.860051:1.1241:1.29252:1.32135:1.85108:1
rps7	BG-EN	MA	0.0308144	0.0355795	0.866071	0.476458	456	14	3.22622	10.7738	0.0317957	1.95632:2.0913:1.80047:1.94689:0.502189:1
rps7	BS-EN	MA	0.0308144	0.0355795	0.866071	0.476458	456	14	3.22622	10.7738	0.0317957	1.95632:2.0913:1.80047:1.94689:0.502189:1
ccsA	BC-CE	MA	0.967478	1.15575	0.837101	0.0190595	480	331	66.0827	264.917	1	0.942292:1.18898:1.36682:1.39594:1.94868:1
ccsA	BH-CE	MA	0.967478	1.15575	0.837101	0.0190595	480	331	66.0827	264.917	1	0.942292:1.18898:1.36682:1.39594:1.94868:1
ycf2	BS-EN	MA	0.012822	0.0175365	0.731158	0.192968	6765	92	23.9825	68.0175	0.0137883	0.741863:0.809651:0.546416:0.664712:0.340317:1
ycf2	BS-VR	MA	0.0273441	0.0374826	0.729516	0.0357053	6765	196	61.2118	134.788	0.0298671	2.9689:2.02959:0.526494:1.39765:1.15757:1
rps19	BC-CE	MA	0.0934849	0.1307	0.715262	0.3672	201	18	5.12414	12.8759	0.101731	6.59549:6.16634:6.8207:8.25178:2.16202:1
rps19	BG-CE	MA	0.0934849	0.1307	0.715262	0.3672	201	18	5.12414	12.8759	0.101731	6.59549:6.16634:6.8207:8.25178:2.16202:1
rps19	BH-CE	MA	0.0934849	0.1307	0.715262	0.3672	201	18	5.12414	12.8759	0.101731	6.59549:6.16634:6.8207:8.25178:2.16202:1
ycf2	BG-VR	MA	0.0269479	0.0380627	0.707989	0.0230688	6765	195	62.1614	132.839	0.0297139	2.94085:2.02257:0.538065:1.4082:1.11184:1
ycf2	BS-CE	MA	0.0148688	0.0215896	0.688704	0.0804699	6765	109	31.9039	77.0961	0.0163594	2.04787:2.02073:1.49172:1.74646:0.34235:1
ycf2	BC-VR	MA	0.0269569	0.0395158	0.682178	0.0113807	6765	197	63.481	133.519	0.0300326	2.75422:2.01979:0.667181:1.43584:0.958154:1
ycf2	BH-VR	MA	0.0269569	0.0395158	0.682178	0.0113807	6765	197	63.481	133.519	0.0300326	2.75422:2.01979:0.667181:1.43584:0.958154:1
ycf2	BG-EN	MA	0.0124476	0.0182518	0.681996	0.115405	6765	91	24.9684	66.0316	0.0136376	0.730103:0.801232:0.53497:0.658535:0.331522:1
ycf2	BP-VR	MA	0.0263597	0.0387321	0.680564	0.0106543	6765	193	62.4082	130.592	0.0293961	2.44965:1.73279:0.524546:1.254:0.869628:1
rps19	BP-CE	MA	0.0855876	0.127901	0.669171	0.365088	201	17	5.03962	11.9604	0.0948942	5.46926:5.0261:3.92893:4.15638:1.75179:1
ycf2	BG-CE	MA	0.014501	0.0221981	0.653255	0.046256	6765	108	32.8251	75.1749	0.0162093	2.02181:1.99967:1.47722:1.73287:0.322906:1
ycf2	BS-AC	MA	0.0245811	0.0376841	0.652293	0.00631853	6765	184	64.8358	119.164	0.0280133	3.27421:2.05443:0.355667:0.890268:1.32395:1
clpP	BP-VR	MA	0.0931879	0.142921	0.652025	0.141316	585	54	18.8944	35.1056	0.106107	1.75105:1.86117:1.30093:1.31231:0.199722:1
rps12	BG-EN	MA	0.0147275	0.0229546	0.641593	0.497999	369	6	1.92113	4.07887	0.0166367	3.20578:4.12726:2.53491:2.70088:0.01:1
rps12	BS-EN	MA	0.0147275	0.0229546	0.641593	0.497999	369	6	1.92113	4.07887	0.0166367	3.20578:4.12726:2.53491:2.70088:0.01:1
ycf2	BC-EN	MA	0.0124773	0.0196185	0.635996	0.0515432	6765	93	26.8824	66.1176	0.0139445	0.701173:0.814494:0.478977:0.627938:0.353016:1
ycf2	BH-EN	MA	0.0124773	0.0196185	0.635996	0.0515432	6765	93	26.8824	66.1176	0.0139445	0.701173:0.814494:0.478977:0.627938:0.353016:1
ycf2	BG-AC	MA	0.0241777	0.0382359	0.632329	0.00280196	6765	183	65.831	117.169	0.0278629	3.24182:2.04609:0.365445:0.897212:1.27184:1
ycf2	BC-CE	MA	0.0145514	0.0234284	0.621102	0.0199022	6765	110	34.5628	75.4372	0.0165179	1.90473:1.91684:1.40802:1.64728:0.283035:1
ycf2	BH-CE	MA	0.0145514	0.0234284	0.621102	0.0199022	6765	110	34.5628	75.4372	0.0165179	1.90473:1.91684:1.40802:1.64728:0.283035:1
ycf2	BP-CE	MA	0.013953	0.0228228	0.611365	0.0173316	6765	106	33.4294	72.5706	0.0159021	1.55452:1.55657:1.14808:1.35719:0.232271:1
ycf2	BC-AC	MA	0.0241868	0.0396323	0.610281	0.00114134	6765	185	67.2757	117.724	0.0281806	3.03192:2.03654:0.460704:0.934922:1.11407:1
ycf2	BH-AC	MA	0.0241868	0.0396323	0.610281	0.00114134	6765	185	67.2757	117.724	0.0281806	3.03192:2.03654:0.460704:0.934922:1.11407:1
ycf2	BP-AC	MA	0.0235874	0.0388608	0.606971	0.00101491	6765	181	66.1896	114.81	0.0275465	2.68818:1.73819:0.36178:0.789082:0.990079:1
ycf2	BP-EN	MA	0.0117862	0.0195038	0.604305	0.0226176	6765	89	26.1697	62.8303	0.0133382	0.561043:0.653677:0.390517:0.530608:0.304178:1
ycf1	BC-VR	MA	0.0384075	0.0636634	0.60329	0.104054	1002	42	14.9416	27.0584	0.0447187	1.61177:1.73563:1.16135:1.18923:0.0700517:1
ycf1	BG-VR	MA	0.0384075	0.0636634	0.60329	0.104054	1002	42	14.9416	27.0584	0.0447187	1.61177:1.73563:1.16135:1.18923:0.0700517:1
ycf1	BH-VR	MA	0.0384075	0.0636634	0.60329	0.104054	1002	42	14.9416	27.0584	0.0447187	1.61177:1.73563:1.16135:1.18923:0.0700517:1
ycf1	BS-VR	MA	0.0384075	0.0636634	0.60329	0.104054	1002	42	14.9416	27.0584	0.0447187	1.61177:1.73563:1.16135:1.18923:0.0700517:1
rps19	BS-CE	MA	0.0942845	0.157811	0.597451	0.25111	201	19	6.18885	12.8111	0.108513	7.72359:6.85836:7.68175:9.47695:2.40514:1
petL	BP-EN	MA	0.0587431	0.098922	0.593832	0.258178	93	6	2.35737	3.64263	0.0698974	15.582:14.3117:26.0884:26.3686:5.8911:1
clpP	BG-VR	MA	0.087125	0.1526	0.570936	0.031591	585	53	20.2156	32.7844	0.104174	1.60747:1.62219:1.21049:1.21337:0.162812:1
clpP	BS-VR	MA	0.087125	0.1526	0.570936	0.031591	585	53	20.2156	32.7844	0.104174	1.60747:1.62219:1.21049:1.21337:0.162812:1
rpl33	BP-VR	MA	0.118593	0.212234	0.558784	0.177472	198	24	7.78939	16.2106	0.138414	2.57192:2.86269:1.67277:1.67486:0.355964:1
rpl33	BC-VR	MA	0.118667	0.212405	0.558684	0.177811	198	24	7.80363	16.1964	0.138548	2.08134:2.32617:1.32096:1.32858:0.176743:1
rpl33	BG-VR	MA	0.118667	0.212405	0.558684	0.177811	198	24	7.80363	16.1964	0.138548	2.08134:2.32617:1.32096:1.32858:0.176743:1
rpl33	BH-VR	MA	0.118667	0.212405	0.558684	0.177811	198	24	7.80363	16.1964	0.138548	2.08134:2.32617:1.32096:1.32858:0.176743:1
rpl33	BS-VR	MA	0.118667	0.212405	0.558684	0.177811	198	24	7.80363	16.1964	0.138548	2.08134:2.32617:1.32096:1.32858:0.176743:1
ycf1	BP-VR	MA	0.0354322	0.0635943	0.55716	0.0634923	1002	40	15.0783	24.9217	0.0425322	1.89639:2.00864:1.3439:1.37106:0.0794112:1
matK	BP-AC	MA	0.162961	0.2978	0.547216	3.75381e-06	1491	232	78.0638	153.936	0.192251	2.02238:2.42525:1.10164:1.29484:0.638754:1
matK	BP-CE	MA	0.117335	0.216005	0.543203	9.54671e-05	1491	175	56.9175	118.083	0.137809	1.91404:1.74522:1.13681:1.59304:0.411242:1
clpP	BC-VR	MA	0.0871571	0.161641	0.539201	0.0221123	585	54	21.3574	32.6426	0.106582	1.47755:1.49831:1.11431:1.1176:0.147926:1
clpP	BH-VR	MA	0.0871571	0.161641	0.539201	0.0221123	585	54	21.3574	32.6426	0.106582	1.47755:1.49831:1.11431:1.1176:0.147926:1
rps18	BC-CE	MA	0.076815	0.145382	0.528365	0.121089	294	24	8.34093	15.6591	0.0918742	5.38029:4.61393:2.98897:3.0112:0.790192:1
rps18	BH-CE	MA	0.076815	0.145382	0.528365	0.121089	294	24	8.34093	15.6591	0.0918742	5.38029:4.61393:2.98897:3.0112:0.790192:1
matK	BP-EN	MA	0.105901	0.203855	0.519492	3.82421e-05	1491	164	52.2432	111.757	0.125041	1.14759:1.13428:0.892108:0.912103:0.322872:1
matK	BC-CE	MA	0.127475	0.253895	0.502078	3.00113e-06	1491	191	63.998	127.002	0.153001	1.74662:1.60744:1.06974:1.46488:0.377698:1
matK	BH-CE	MA	0.127475	0.253895	0.502078	3.00113e-06	1491	191	63.998	127.002	0.153001	1.74662:1.60744:1.06974:1.46488:0.377698:1
matK	BC-EN	MA	0.113049	0.226973	0.498075	1.25034e-05	1491	175	55.9125	119.087	0.134641	1.03628:1.04004:0.814746:0.843014:0.309696:1
matK	BH-EN	MA	0.113049	0.226973	0.498075	1.25034e-05	1491	175	55.9125	119.087	0.134641	1.03628:1.04004:0.814746:0.843014:0.309696:1
matK	BC-AC	MA	0.165454	0.335651	0.492934	1.8229e-08	1491	241	86.5538	154.446	0.202293	1.63911:2.31215:0.595442:1.00043:0.699306:1
matK	BH-AC	MA	0.165454	0.335651	0.492934	1.8229e-08	1491	241	86.5538	154.446	0.202293	1.63911:2.31215:0.595442:1.00043:0.699306:1
psaI	BC-VR	MA	0.0694811	0.142465	0.487707	0.15931	105	8	3.43412	4.56588	0.0890679	6.46775:4.24869:3.60088:3.60088:4.92676:1
psaI	BG-VR	MA	0.0694811	0.142465	0.487707	0.15931	105	8	3.43412	4.56588	0.0890679	6.46775:4.24869:3.60088:3.60088:4.92676:1
psaI	BH-VR	MA	0.0694811	0.142465	0.487707	0.15931	105	8	3.43412	4.56588	0.0890679	6.46775:4.24869:3.60088:3.60088:4.92676:1
psaI	BP-VR	MA	0.0694811	0.142465	0.487707	0.15931	105	8	3.43412	4.56588	0.0890679	6.46775:4.24869:3.60088:3.60088:4.92676:1
psaI	BS-VR	MA	0.0694811	0.142465	0.487707	0.15931	105	8	3.43412	4.56588	0.0890679	6.46775:4.24869:3.60088:3.60088:4.92676:1
rps18	BG-CE	MA	0.0711997	0.146131	0.487231	0.0611274	294	23	8.46668	14.5333	0.0877664	5.1538:4.13341:2.63816:2.66381:0.827469:1
rps18	BS-CE	MA	0.0711997	0.146131	0.487231	0.0611274	294	23	8.46668	14.5333	0.0877664	5.1538:4.13341:2.63816:2.66381:0.827469:1
ycf1	BC-CE	MA	0.0265671	0.0547229	0.485484	0.0377416	1002	32	13.0605	18.9395	0.033629	4.10252:4.29932:2.72397:2.68501:1.04082:1
ycf1	BG-CE	MA	0.0265671	0.0547229	0.485484	0.0377416	1002	32	13.0605	18.9395	0.033629	4.10252:4.29932:2.72397:2.68501:1.04082:1
ycf1	BH-CE	MA	0.0265671	0.0547229	0.485484	0.0377416	1002	32	13.0605	18.9395	0.033629	4.10252:4.29932:2.72397:2.68501:1.04082:1
ycf1	BS-CE	MA	0.0265671	0.0547229	0.485484	0.0377416	1002	32	13.0605	18.9395	0.033629	4.10252:4.29932:2.72397:2.68501:1.04082:1
rps8	BC-CE	MA	0.120341	0.248755	0.483771	0.00991092	402	50	18.5261	31.4739	0.148803	2.39597:3.31156:1.30203:1.42014:0.125514:1
rps8	BG-CE	MA	0.120341	0.248755	0.483771	0.00991092	402	50	18.5261	31.4739	0.148803	2.39597:3.31156:1.30203:1.42014:0.125514:1
rps8	BH-CE	MA	0.120341	0.248755	0.483771	0.00991092	402	50	18.5261	31.4739	0.148803	2.39597:3.31156:1.30203:1.42014:0.125514:1
rps8	BS-CE	MA	0.120341	0.248755	0.483771	0.00991092	402	50	18.5261	31.4739	0.148803	2.39597:3.31156:1.30203:1.42014:0.125514:1
matK	BG-CE	MA	0.125268	0.260641	0.480616	5.45807e-07	1491	190	65.4901	124.51	0.152584	1.76671:1.64033:1.10782:1.50775:0.348493:1
matK	BS-CE	MA	0.125268	0.260641	0.480616	5.45807e-07	1491	190	65.4901	124.51	0.152584	1.76671:1.64033:1.10782:1.50775:0.348493:1
matK	BG-AC	MA	0.163844	0.341135	0.480291	3.9966e-09	1491	240	88.3352	151.665	0.202598	1.65241:2.47691:0.490267:0.982459:0.776878:1
matK	BS-AC	MA	0.163844	0.341135	0.480291	3.9966e-09	1491	240	88.3352	151.665	0.202598	1.65241:2.47691:0.490267:0.982459:0.776878:1
matK	BG-EN	MA	0.111142	0.232128	0.478798	1.53812e-06	1491	174	57.148	116.852	0.134098	1.03475:1.04186:0.809308:0.846706:0.29326:1
matK	BS-EN	MA	0.111142	0.232128	0.478798	1.53812e-06	1491	174	57.148	116.852	0.134098	1.03475:1.04186:0.809308:0.846706:0.29326:1
rps12	BP-EN	MA	0.0109109	0.0230979	0.472377	0.429758	369	5	1.96664	3.03336	0.0137682	2.49206:2.85738:1.96252:2.11542:0.01:1
ycf1	BC-AC	MA	0.0349455	0.0742619	0.470571	0.0170042	1002	42	17.4371	24.5629	0.0447906	4.44626:5.05375:3.06785:3.53698:0.492511:1
ycf1	BG-AC	MA	0.0349455	0.0742619	0.470571	0.0170042	1002	42	17.4371	24.5629	0.0447906	4.44626:5.05375:3.06785:3.53698:0.492511:1
ycf1	BH-AC	MA	0.0349455	0.0742619	0.470571	0.0170042	1002	42	17.4371	24.5629	0.0447906	4.44626:5.05375:3.06785:3.53698:0.492511:1
ycf1	BS-AC	MA	0.0349455	0.0742619	0.470571	0.0170042	1002	42	17.4371	24.5629	0.0447906	4.44626:5.05375:3.06785:3.53698:0.492511:1
rps19	BC-VR	MA	0.11252	0.258734	0.434889	0.050436	201	24	8.67154	15.3285	0.14139	0.808893:2.27981:0.673799:0.911069:1.61214:1
rps19	BG-VR	MA	0.11252	0.258734	0.434889	0.050436	201	24	8.67154	15.3285	0.14139	0.808893:2.27981:0.673799:0.911069:1.61214:1
rps19	BH-VR	MA	0.11252	0.258734	0.434889	0.050436	201	24	8.67154	15.3285	0.14139	0.808893:2.27981:0.673799:0.911069:1.61214:1
ycf1	BP-CE	MA	0.0239287	0.0551319	0.434027	0.0279056	1002	30	12.7976	17.2024	0.0315448	5.70622:5.87597:4.5126:4.38884:2.08283:1
ycf1	BP-AC	MA	0.0322858	0.0743916	0.433998	0.00803255	1002	40	17.1588	22.8412	0.0426383	5.29268:5.88564:4.229:4.88609:0.742606:1
rps8	BP-CE	MA	0.115825	0.269081	0.430446	0.00295528	402	50	19.8296	30.1704	0.149622	2.32048:3.38433:1.19255:1.32808:0.129023:1
rpl33	BC-AC	MA	0.103452	0.248992	0.415481	0.020729	198	23	8.60297	14.397	0.132399	1.16479:1.69002:0.792314:0.786674:0.21839:1
rpl33	BG-AC	MA	0.103452	0.248992	0.415481	0.020729	198	23	8.60297	14.397	0.132399	1.16479:1.69002:0.792314:0.786674:0.21839:1
rpl33	BH-AC	MA	0.103452	0.248992	0.415481	0.020729	198	23	8.60297	14.397	0.132399	1.16479:1.69002:0.792314:0.786674:0.21839:1
rpl33	BS-AC	MA	0.103452	0.248992	0.415481	0.020729	198	23	8.60297	14.397	0.132399	1.16479:1.69002:0.792314:0.786674:0.21839:1
rpl33	BP-AC	MA	0.101614	0.25294	0.401733	0.0234826	198	23	8.92532	14.0747	0.132338	1.55093:2.26453:0.980071:0.961294:0.353019:1
rps19	BP-VR	MA	0.103579	0.2608	0.39716	0.0202502	201	23	8.81422	14.1858	0.134698	0.835912:2.18326:0.622658:0.667201:1.51812:1
rps18	BP-CE	MA	0.0653496	0.167432	0.390305	0.0130097	294	23	9.51814	13.4819	0.0874021	4.83875:3.899:2.47911:2.50618:0.806982:1
rps19	BS-VR	MA	0.111339	0.289342	0.384801	0.00500113	201	25	10.1267	14.8733	0.148294	1.2384:2.17888:0.889871:1.08584:1.29628:1
psbN	BC-CE	MA	0.0234014	0.060918	0.384146	0.385223	129	4	1.92053	2.07947	0.0332261	5.99951:5.82075:5.384:5.384:5.74061:1
psbN	BG-CE	MA	0.0234014	0.060918	0.384146	0.385223	129	4	1.92053	2.07947	0.0332261	5.99951:5.82075:5.384:5.384:5.74061:1
psbN	BH-CE	MA	0.0234014	0.060918	0.384146	0.385223	129	4	1.92053	2.07947	0.0332261	5.99951:5.82075:5.384:5.384:5.74061:1
psbN	BP-CE	MA	0.0234014	0.060918	0.384146	0.385223	129	4	1.92053	2.07947	0.0332261	5.99951:5.82075:5.384:5.384:5.74061:1
psbN	BS-CE	MA	0.0234014	0.060918	0.384146	0.385223	129	4	1.92053	2.07947	0.0332261	5.99951:5.82075:5.384:5.384:5.74061:1
petL	BG-EN	MA	0.0576863	0.153683	0.375359	0.116061	93	7	3.42788	3.57212	0.0831077	3.22408:2.98359:3.06239:3.10524:0.251304:1
petL	BS-EN	MA	0.0576863	0.153683	0.375359	0.116061	93	7	3.42788	3.57212	0.0831077	3.22408:2.98359:3.06239:3.10524:0.251304:1
rpl2	BC-EN	MA	0.00470527	0.013014	0.361555	0.352468	822	5	1.85079	3.14921	0.00616136	1.14134:2.22406:2.96261:1.55194:14.5564:1
rpl2	BG-EN	MA	0.00470527	0.013014	0.361555	0.352468	822	5	1.85079	3.14921	0.00616136	1.14134:2.22406:2.96261:1.55194:14.5564:1
rpl2	BH-EN	MA	0.00470527	0.013014	0.361555	0.352468	822	5	1.85079	3.14921	0.00616136	1.14134:2.22406:2.96261:1.55194:14.5564:1
rpl2	BP-EN	MA	0.00470527	0.013014	0.361555	0.352468	822	5	1.85079	3.14921	0.00616136	1.14134:2.22406:2.96261:1.55194:14.5564:1
rpl2	BS-EN	MA	0.00470527	0.013014	0.361555	0.352468	822	5	1.85079	3.14921	0.00616136	1.14134:2.22406:2.96261:1.55194:14.5564:1
rps15	BG-CE	MA	0.0920565	0.256743	0.358555	0.00245188	261	28	11.0694	16.9306	0.123332	2.77926:2.52602:2.11468:2.32878:1.63191:1
rps15	BS-CE	MA	0.0920565	0.256743	0.358555	0.00245188	261	28	11.0694	16.9306	0.123332	2.77926:2.52602:2.11468:2.32878:1.63191:1
rps15	BP-CE	MA	0.0875031	0.244066	0.358523	0.00679816	261	27	10.9077	16.0923	0.118112	2.89329:2.59361:2.07508:2.23254:1.42234:1
matK	BP-VR	MA	0.14646	0.415791	0.352245	4.94329e-18	1491	240	104.158	135.842	0.203734	1.47399:1.85935:0.755856:0.776204:0.653983:1
rps19	BC-EN	MA	0.0260806	0.0748777	0.348309	0.105348	201	7	3.06814	3.93186	0.036509	1.97707:2.61629:1.39661:1.81837:0.685604:1
rps19	BG-EN	MA	0.0260806	0.0748777	0.348309	0.105348	201	7	3.06814	3.93186	0.036509	1.97707:2.61629:1.39661:1.81837:0.685604:1
rps19	BH-EN	MA	0.0260806	0.0748777	0.348309	0.105348	201	7	3.06814	3.93186	0.036509	1.97707:2.61629:1.39661:1.81837:0.685604:1
rpl36	BP-EN	MA	0.040035	0.115252	0.347368	0.223052	111	6	2.91404	3.08596	0.0586134	2.47922:2.13093:1.43139:1.42034:0.300098:1
clpP	BP-AC	MA	0.0979238	0.287304	0.340837	2.47996e-06	585	69	33.931	35.069	0.144889	2.0818:3.04582:1.11402:1.0792:0.386375:1
rpl36	BC-CE	MA	0.0813258	0.244837	0.332163	0.0348926	111	11	5.19494	5.80506	0.118793	5.43552:3.89348:3.23442:3.19311:0.654618:1
rpl36	BG-CE	MA	0.0813258	0.244837	0.332163	0.0348926	111	11	5.19494	5.80506	0.118793	5.43552:3.89348:3.23442:3.19311:0.654618:1
rpl36	BH-CE	MA	0.0813258	0.244837	0.332163	0.0348926	111	11	5.19494	5.80506	0.118793	5.43552:3.89348:3.23442:3.19311:0.654618:1
rpl36	BS-CE	MA	0.0813258	0.244837	0.332163	0.0348926	111	11	5.19494	5.80506	0.118793	5.43552:3.89348:3.23442:3.19311:0.654618:1
rps12	BG-CE	MA	0.0208338	0.0628371	0.331553	0.0467227	369	11	5.50764	5.49236	0.0313144	26.1225:17.5129:17.3354:18.1211:0.01:1
rps12	BS-CE	MA	0.0208338	0.0628371	0.331553	0.0467227	369	11	5.50764	5.49236	0.0313144	26.1225:17.5129:17.3354:18.1211:0.01:1
clpP	BG-AC	MA	0.0976752	0.294652	0.331494	4.48703e-07	585	70	35.0033	34.9967	0.146722	2.04797:2.48999:1.26071:1.2602:0.367067:1
clpP	BS-AC	MA	0.0976752	0.294652	0.331494	4.48703e-07	585	70	35.0033	34.9967	0.146722	2.04797:2.48999:1.26071:1.2602:0.367067:1
matK	BC-VR	MA	0.151003	0.46137	0.327292	1.43596e-21	1491	251	113.291	137.709	0.216844	1.20531:1.84168:0.388951:0.46818:0.737961:1
matK	BH-VR	MA	0.151003	0.46137	0.327292	1.43596e-21	1491	251	113.291	137.709	0.216844	1.20531:1.84168:0.388951:0.46818:0.737961:1
rpl14	BC-CE	MA	0.060544	0.185641	0.326135	0.00144757	366	29	13.6708	15.3292	0.0887305	3.67084:4.74677:2.05169:2.0709:0.307005:1
rpl14	BH-CE	MA	0.060544	0.185641	0.326135	0.00144757	366	29	13.6708	15.3292	0.0887305	3.67084:4.74677:2.05169:2.0709:0.307005:1
rps15	BP-EN	MA	0.0727527	0.227043	0.320436	0.00675819	261	23	9.83038	13.1696	0.102534	3.39919:3.00999:2.42805:3.69093:1.1246:1
rpl33	BC-CE	MA	0.0835343	0.261905	0.318949	0.00481577	198	21	9.14452	11.8555	0.118752	0.885345:0.995572:0.659154:0.666996:0.372575:1
rpl33	BG-CE	MA	0.0835343	0.261905	0.318949	0.00481577	198	21	9.14452	11.8555	0.118752	0.885345:0.995572:0.659154:0.666996:0.372575:1
rpl33	BH-CE	MA	0.0835343	0.261905	0.318949	0.00481577	198	21	9.14452	11.8555	0.118752	0.885345:0.995572:0.659154:0.666996:0.372575:1
rpl33	BS-CE	MA	0.0835343	0.261905	0.318949	0.00481577	198	21	9.14452	11.8555	0.118752	0.885345:0.995572:0.659154:0.666996:0.372575:1
clpP	BC-AC	MA	0.0976576	0.306476	0.318647	2.39945e-07	585	71	36.2131	34.7869	0.149671	1.80485:2.2384:1.10464:1.10433:0.33475:1
clpP	BH-AC	MA	0.0976576	0.306476	0.318647	2.39945e-07	585	71	36.2131	34.7869	0.149671	1.80485:2.2384:1.10464:1.10433:0.33475:1
atpF	BG-AC	MA	0.0645956	0.207672	0.311046	1.69905e-05	552	47	25.3651	21.6349	0.102829	8.8206:4.4421:1.24213:1.31802:0.232401:1
rps15	BG-EN	MA	0.0762223	0.245659	0.310277	0.00325382	261	24	10.3508	13.6492	0.108496	3.54018:3.2002:2.54053:3.82782:1.36071:1
rps15	BS-EN	MA	0.0762223	0.245659	0.310277	0.00325382	261	24	10.3508	13.6492	0.108496	3.54018:3.2002:2.54053:3.82782:1.36071:1
rpl14	BP-CE	MA	0.056873	0.18434	0.308523	0.000986262	366	28	13.5352	14.4648	0.0854284	3.95188:4.84018:2.67301:2.78379:0.421068:1
rpoC2	BP-CE	MA	0.0558782	0.18142	0.308005	2.00791e-26	4083	312	157.282	154.718	0.0858134	2.44897:1.45934:0.0824321:0.545375:0.561872:1
psaI	BC-EN	MA	0.0267466	0.0871816	0.306792	0.158538	105	4	2.20041	1.79959	0.0432328	27.9945:30:23.5547:23.5547:0.01:1
psaI	BG-EN	MA	0.0267466	0.0871816	0.306792	0.158538	105	4	2.20041	1.79959	0.0432328	27.9945:30:23.5547:23.5547:0.01:1
psaI	BH-EN	MA	0.0267466	0.0871816	0.306792	0.158538	105	4	2.20041	1.79959	0.0432328	27.9945:30:23.5547:23.5547:0.01:1
psaI	BP-EN	MA	0.0267466	0.0871816	0.306792	0.158538	105	4	2.20041	1.79959	0.0432328	27.9945:30:23.5547:23.5547:0.01:1
psaI	BS-EN	MA	0.0267466	0.0871816	0.306792	0.158538	105	4	2.20041	1.79959	0.0432328	27.9945:30:23.5547:23.5547:0.01:1
rps15	BC-CE	MA	0.0972323	0.317344	0.306394	0.000727211	261	31	13.7179	17.2821	0.140292	2.39303:2.03505:1.52773:1.62308:1.34155:1
rps15	BH-CE	MA	0.0972323	0.317344	0.306394	0.000727211	261	31	13.7179	17.2821	0.140292	2.39303:2.03505:1.52773:1.62308:1.34155:1
rpl33	BP-CE	MA	0.0820949	0.26816	0.306142	0.00481906	198	21	9.36251	11.6375	0.118865	1.09196:1.22237:0.791313:0.795813:0.624383:1
rpl14	BG-CE	MA	0.0568564	0.186773	0.304414	0.000967684	366	28	13.6044	14.3956	0.0858812	4.44807:5.79835:2.61191:2.63556:0.424658:1
rpl14	BS-CE	MA	0.0568564	0.186773	0.304414	0.000967684	366	28	13.6044	14.3956	0.0858812	4.44807:5.79835:2.61191:2.63556:0.424658:1
matK	BG-VR	MA	0.145388	0.477983	0.30417	4.86269e-24	1491	248	115.783	132.217	0.215345	1.21079:1.77439:0.428664:0.525539:0.695623:1
matK	BS-VR	MA	0.145388	0.477983	0.30417	4.86269e-24	1491	248	115.783	132.217	0.215345	1.21079:1.77439:0.428664:0.525539:0.695623:1
rps3	BG-AC	MA	0.0968521	0.319373	0.303257	9.27622e-08	654	76	33.9799	42.0201	0.140675	2.70102:2.76925:1.95308:2.01769:0.385708:1
rps3	BS-AC	MA	0.0968521	0.319373	0.303257	9.27622e-08	654	76	33.9799	42.0201	0.140675	2.70102:2.76925:1.95308:2.01769:0.385708:1
atpF	BC-AC	MA	0.0616798	0.205899	0.299563	1.55208e-05	552	46	25.5684	20.4316	0.101003	8.85387:4.0665:1.03241:1.11464:0.227269:1
atpF	BH-AC	MA	0.0616798	0.205899	0.299563	1.55208e-05	552	46	25.5684	20.4316	0.101003	8.85387:4.0665:1.03241:1.11464:0.227269:1
atpF	BS-AC	MA	0.0616798	0.205899	0.299563	1.55208e-05	552	46	25.5684	20.4316	0.101003	8.85387:4.0665:1.03241:1.11464:0.227269:1
petL	BP-CE	MA	0.0741054	0.247902	0.29893	0.0654418	93	9	4.77393	4.22607	0.117978	8.91675:9.67105:7.12534:7.09906:3.39128:1
rps11	BC-EN	MA	0.041025	0.139443	0.294206	0.0013149	414	25	13.7532	11.2468	0.0670646	4.89646:3.89222:2.12793:2.13941:0.453982:1
rps11	BG-EN	MA	0.041025	0.139443	0.294206	0.0013149	414	25	13.7532	11.2468	0.0670646	4.89646:3.89222:2.12793:2.13941:0.453982:1
rps11	BH-EN	MA	0.041025	0.139443	0.294206	0.0013149	414	25	13.7532	11.2468	0.0670646	4.89646:3.89222:2.12793:2.13941:0.453982:1
rps11	BS-EN	MA	0.041025	0.139443	0.294206	0.0013149	414	25	13.7532	11.2468	0.0670646	4.89646:3.89222:2.12793:2.13941:0.453982:1
psaJ	BC-VR	MA	0.0660655	0.224974	0.293658	0.0291147	126	12	6.93761	5.06239	0.111665	1.22654:1.35019:0.807948:0.797153:0.619049:1
psaJ	BG-VR	MA	0.0660655	0.224974	0.293658	0.0291147	126	12	6.93761	5.06239	0.111665	1.22654:1.35019:0.807948:0.797153:0.619049:1
psaJ	BH-VR	MA	0.0660655	0.224974	0.293658	0.0291147	126	12	6.93761	5.06239	0.111665	1.22654:1.35019:0.807948:0.797153:0.619049:1
psaJ	BP-VR	MA	0.0660655	0.224974	0.293658	0.0291147	126	12	6.93761	5.06239	0.111665	1.22654:1.35019:0.807948:0.797153:0.619049:1
psaJ	BS-VR	MA	0.0660655	0.224974	0.293658	0.0291147	126	12	6.93761	5.06239	0.111665	1.22654:1.35019:0.807948:0.797153:0.619049:1
rps3	BC-AC	MA	0.0961308	0.336273	0.285871	1.12903e-08	654	77	35.3592	41.6408	0.143038	2.75037:2.81384:1.95185:2.00412:0.410792:1
rps3	BH-AC	MA	0.0961308	0.336273	0.285871	1.12903e-08	654	77	35.3592	41.6408	0.143038	2.75037:2.81384:1.95185:2.00412:0.410792:1
rps12	BP-CE	MA	0.0172613	0.0604935	0.285342	0.0399984	369	10	5.54118	4.45882	0.0285786	26.1945:13.0019:13.2681:14.4089:0.01:1
rpl33	BC-EN	MA	0.0961379	0.338321	0.284162	0.000374328	198	24	11.1922	12.8078	0.144313	2.8187:2.68426:2.05501:2.04966:1.19377:1
rpl33	BG-EN	MA	0.0961379	0.338321	0.284162	0.000374328	198	24	11.1922	12.8078	0.144313	2.8187:2.68426:2.05501:2.04966:1.19377:1
rpl33	BH-EN	MA	0.0961379	0.338321	0.284162	0.000374328	198	24	11.1922	12.8078	0.144313	2.8187:2.68426:2.05501:2.04966:1.19377:1
rpl33	BS-EN	MA	0.0961379	0.338321	0.284162	0.000374328	198	24	11.1922	12.8078	0.144313	2.8187:2.68426:2.05501:2.04966:1.19377:1
rpl33	BP-EN	MA	0.0996907	0.351443	0.283661	0.000602301	198	24	10.3816	13.6184	0.144451	3.20234:3.04945:3.2741:3.22999:3.27329:1
rps3	BP-AC	MA	0.0912436	0.323073	0.282424	1.88451e-08	654	74	34.3357	39.6643	0.136787	2.80567:2.87614:1.94311:2.00323:0.362284:1
rpoC2	BP-EN	MA	0.0491176	0.174885	0.280856	5.0889e-27	4083	281	135.593	145.407	0.0752199	1.36828:1.14118:0.533625:0.793125:0.487022:1
rps3	BG-EN	MA	0.0617595	0.220558	0.280014	1.36899e-06	654	52	23.1933	28.8067	0.0909741	1.55803:1.69337:1.16616:1.18752:0.331982:1
rps3	BS-EN	MA	0.0617595	0.220558	0.280014	1.36899e-06	654	52	23.1933	28.8067	0.0909741	1.55803:1.69337:1.16616:1.18752:0.331982:1
atpF	BP-AC	MA	0.0565362	0.204873	0.275957	3.64916e-06	552	44	25.3276	18.6724	0.0969377	10.8047:5.11629:1.22577:1.35343:0.297031:1
rps12	BC-EN	MA	0.00716499	0.0260368	0.275187	0.326572	369	4	1.88328	2.11672	0.0108767	1.16728:6.99819:0.729625:0.729625:0.01:1
rps12	BH-EN	MA	0.00716499	0.0260368	0.275187	0.326572	369	4	1.88328	2.11672	0.0108767	1.16728:6.99819:0.729625:0.729625:0.01:1
rpl36	BP-CE	MA	0.0836737	0.304978	0.27436	0.0186532	111	12	6.31198	5.68802	0.135325	6.01437:4.90444:4.2141:4.17767:0.745988:1
ycf1	BC-EN	MA	0.0150701	0.0551226	0.273393	0.000850124	1002	24	13.3608	10.6392	0.0253069	1.74631:2.32914:0.989654:1.02865:0.171003:1
ycf1	BG-EN	MA	0.0150701	0.0551226	0.273393	0.000850124	1002	24	13.3608	10.6392	0.0253069	1.74631:2.32914:0.989654:1.02865:0.171003:1
ycf1	BH-EN	MA	0.0150701	0.0551226	0.273393	0.000850124	1002	24	13.3608	10.6392	0.0253069	1.74631:2.32914:0.989654:1.02865:0.171003:1
ycf1	BS-EN	MA	0.0150701	0.0551226	0.273393	0.000850124	1002	24	13.3608	10.6392	0.0253069	1.74631:2.32914:0.989654:1.02865:0.171003:1
rpoC2	BG-CE	MA	0.0539199	0.19761	0.272861	1.39986e-32	4083	316	166.645	149.355	0.087456	2.31305:1.49091:0.136636:0.617587:0.482152:1
psaI	BC-CE	MA	0.025122	0.0922752	0.272251	0.158721	105	4	2.3407	1.6593	0.043756	3.74203:3.56569:1.46449:1.46449:0.01:1
psaI	BG-CE	MA	0.025122	0.0922752	0.272251	0.158721	105	4	2.3407	1.6593	0.043756	3.74203:3.56569:1.46449:1.46449:0.01:1
psaI	BH-CE	MA	0.025122	0.0922752	0.272251	0.158721	105	4	2.3407	1.6593	0.043756	3.74203:3.56569:1.46449:1.46449:0.01:1
psaI	BP-CE	MA	0.025122	0.0922752	0.272251	0.158721	105	4	2.3407	1.6593	0.043756	3.74203:3.56569:1.46449:1.46449:0.01:1
psaI	BS-CE	MA	0.025122	0.0922752	0.272251	0.158721	105	4	2.3407	1.6593	0.043756	3.74203:3.56569:1.46449:1.46449:0.01:1
rps15	BG-VR	MA	0.0984429	0.36318	0.271058	5.18707e-05	261	34	18.9439	15.0561	0.16577	5.87743:2.16813:0.770026:0.80091:1.70004:1
rps15	BS-VR	MA	0.0984429	0.36318	0.271058	5.18707e-05	261	34	18.9439	15.0561	0.16577	5.87743:2.16813:0.770026:0.80091:1.70004:1
rpoC2	BC-CE	MA	0.0548689	0.203167	0.270068	8.19643e-34	4083	322	170.093	151.907	0.0893017	2.45924:1.59895:0.161791:0.691963:0.554563:1
rpoC2	BH-CE	MA	0.0548689	0.203167	0.270068	8.19643e-34	4083	322	170.093	151.907	0.0893017	2.45924:1.59895:0.161791:0.691963:0.554563:1
rpoC2	BS-CE	MA	0.0539111	0.199668	0.270004	4.45439e-33	4083	317	167.634	149.366	0.0878076	2.30678:1.51163:0.149342:0.62896:0.481507:1
rps3	BP-EN	MA	0.0572066	0.213077	0.268479	1.11138e-06	654	49	22.076	26.924	0.0853286	1.26895:1.47032:0.936972:0.971712:0.265633:1
rps15	BP-VR	MA	0.0927576	0.346246	0.267895	1.65606e-05	261	33	19.0086	13.9914	0.160398	6.74439:2.36824:0.856792:0.888493:1.25801:1
rps19	BS-EN	MA	0.0261561	0.0976547	0.267843	0.0617272	201	8	4.13588	3.86412	0.0420864	2.73806:2.9284:1.85003:2.2256:0.542723:1
rps19	BP-EN	MA	0.0193206	0.0722364	0.267464	0.104357	201	6	3.0402	2.9598	0.030725	2.08072:2.73515:1.13908:1.13908:0.701932:1
rps18	BC-VR	MA	0.0610285	0.231148	0.264023	0.000575437	294	24	11.7004	12.2996	0.0951788	8.55843:8.97985:8.42608:8.52312:1.81276:1
rps18	BH-VR	MA	0.0610285	0.231148	0.264023	0.000575437	294	24	11.7004	12.2996	0.0951788	8.55843:8.97985:8.42608:8.52312:1.81276:1
rpoC2	BS-EN	MA	0.0490661	0.187006	0.262377	1.97019e-30	4083	288	142.915	145.085	0.0773953	1.31834:1.10199:0.521183:0.76455:0.459407:1
ycf4	BP-CE	MA	0.0559769	0.214992	0.260367	2.40262e-06	552	44	24.3486	19.6514	0.094763	2.7407:2.21205:1.35472:1.37455:0.328218:1
rpoC2	BG-EN	MA	0.0491069	0.188633	0.260331	8.28494e-31	4083	289	143.812	145.188	0.0777101	1.31127:1.11422:0.555534:0.787058:0.441797:1
rpoC2	BC-EN	MA	0.0504868	0.194769	0.259214	1.57139e-32	4083	297	148.268	148.732	0.0801143	1.35581:1.15464:0.571377:0.800279:0.46621:1
rpoC2	BH-EN	MA	0.0504868	0.194769	0.259214	1.57139e-32	4083	297	148.268	148.732	0.0801143	1.35581:1.15464:0.571377:0.800279:0.46621:1
ccsA	BP-EN	MA	0.075676	0.292367	0.258839	9.0744e-12	960	93	47.6573	45.3427	0.122019	1.10345:1.19083:0.796913:0.821091:0.392971:1
rps11	BP-EN	MA	0.0416589	0.161233	0.258376	0.000315278	414	27	15.891	11.109	0.0739271	5.98927:4.03627:1.93025:1.94776:0.540809:1
rps8	BC-EN	MA	0.0560581	0.217512	0.257724	5.83794e-05	402	33	16.9137	16.0863	0.0904812	1.01855:1.46786:0.628923:0.73775:0.0905733:1
rps8	BG-EN	MA	0.0560581	0.217512	0.257724	5.83794e-05	402	33	16.9137	16.0863	0.0904812	1.01855:1.46786:0.628923:0.73775:0.0905733:1
rps8	BH-EN	MA	0.0560581	0.217512	0.257724	5.83794e-05	402	33	16.9137	16.0863	0.0904812	1.01855:1.46786:0.628923:0.73775:0.0905733:1
rps8	BS-EN	MA	0.0560581	0.217512	0.257724	5.83794e-05	402	33	16.9137	16.0863	0.0904812	1.01855:1.46786:0.628923:0.73775:0.0905733:1
rps3	BG-CE	MA	0.0806709	0.314067	0.256859	4.33388e-09	654	66	31.1653	34.8347	0.124283	2.59716:3.49143:1.45719:1.82703:0.832171:1
rps3	BS-CE	MA	0.0806709	0.314067	0.256859	4.33388e-09	654	66	31.1653	34.8347	0.124283	2.59716:3.49143:1.45719:1.82703:0.832171:1
rps3	BC-CE	MA	0.0796654	0.311968	0.255364	5.25337e-09	654	65	30.1124	34.8876	0.12162	2.2405:3.5782:1.07157:1.43551:0.97773:1
rps3	BH-CE	MA	0.0796654	0.311968	0.255364	5.25337e-09	654	65	30.1124	34.8876	0.12162	2.2405:3.5782:1.07157:1.43551:0.97773:1
ycf4	BG-CE	MA	0.0551598	0.21681	0.254415	2.96984e-06	552	44	24.8928	19.1072	0.095401	2.74275:2.04959:1.14528:1.24263:0.372395:1
ycf4	BS-CE	MA	0.0551598	0.21681	0.254415	2.96984e-06	552	44	24.8928	19.1072	0.095401	2.74275:2.04959:1.14528:1.24263:0.372395:1
accD	BP-EN	MA	0.0487426	0.192155	0.253663	1.24529e-09	1257	80	34.5985	45.4015	0.0719742	0.701615:0.743187:0.557673:0.605354:0.303582:1
accD	BP-VR	MA	0.0487426	0.192155	0.253663	1.24529e-09	1257	80	34.5985	45.4015	0.0719742	0.701615:0.743187:0.557673:0.605354:0.303582:1
psbJ	BC-EN	MA	0.0211403	0.084183	0.251123	0.166114	120	4	2.10037	1.89963	0.0348407	0.442084:1.83856:0.273228:0.273228:0.01:1
psbJ	BG-EN	MA	0.0211403	0.084183	0.251123	0.166114	120	4	2.10037	1.89963	0.0348407	0.442084:1.83856:0.273228:0.273228:0.01:1
psbJ	BH-EN	MA	0.0211403	0.084183	0.251123	0.166114	120	4	2.10037	1.89963	0.0348407	0.442084:1.83856:0.273228:0.273228:0.01:1
psbJ	BS-EN	MA	0.0211403	0.084183	0.251123	0.166114	120	4	2.10037	1.89963	0.0348407	0.442084:1.83856:0.273228:0.273228:0.01:1
atpF	BG-VR	MA	0.0687318	0.276481	0.248595	7.4938e-08	552	54	29.8509	24.1491	0.117565	2.96539:1.98087:0.969595:1.10216:0.332512:1
atpF	BC-VR	MA	0.0691228	0.280017	0.246852	5.33242e-08	552	54	29.724	24.276	0.118071	2.58826:1.71776:0.854193:0.974993:0.402243:1
atpF	BH-VR	MA	0.0691228	0.280017	0.246852	5.33242e-08	552	54	29.724	24.276	0.118071	2.58826:1.71776:0.854193:0.974993:0.402243:1
atpF	BS-VR	MA	0.0691228	0.280017	0.246852	5.33242e-08	552	54	29.724	24.276	0.118071	2.58826:1.71776:0.854193:0.974993:0.402243:1
ccsA	BP-VR	MA	0.105132	0.428281	0.245474	7.60121e-17	960	125	64.9631	60.0369	0.172951	1.36764:1.75592:0.806402:0.877597:0.660918:1
rps3	BC-EN	MA	0.0612466	0.249592	0.245387	1.19171e-07	654	54	25.6952	28.3048	0.0955593	1.45941:1.54309:1.11651:1.1389:0.284054:1
rps3	BH-EN	MA	0.0612466	0.249592	0.245387	1.19171e-07	654	54	25.6952	28.3048	0.0955593	1.45941:1.54309:1.11651:1.1389:0.284054:1
petL	BP-VR	MA	0.0568813	0.233987	0.243096	0.0623024	93	8	4.98257	3.01743	0.107611	21.8681:21.7377:24.7654:24.7384:2.5836:1
rps2	BC-CE	MA	0.0408365	0.168395	0.242503	7.1722e-07	708	43	22.1444	20.8556	0.0669561	3.07792:2.95652:2.16631:2.50408:0.335299:1
rps2	BG-CE	MA	0.0408365	0.168395	0.242503	7.1722e-07	708	43	22.1444	20.8556	0.0669561	3.07792:2.95652:2.16631:2.50408:0.335299:1
rps2	BH-CE	MA	0.0408365	0.168395	0.242503	7.1722e-07	708	43	22.1444	20.8556	0.0669561	3.07792:2.95652:2.16631:2.50408:0.335299:1
rps2	BS-CE	MA	0.0408365	0.168395	0.242503	7.1722e-07	708	43	22.1444	20.8556	0.0669561	3.07792:2.95652:2.16631:2.50408:0.335299:1
atpF	BG-EN	MA	0.045942	0.190024	0.24177	6.98356e-06	552	37	19.6992	17.3008	0.0770438	2.36298:2.33287:1.43161:1.48234:0.13872:1
rps18	BG-VR	MA	0.0556024	0.231373	0.240315	0.000340968	294	23	11.7529	11.2471	0.0908827	8.08346:8.27499:7.96115:8.05762:1.80929:1
rps18	BS-VR	MA	0.0556024	0.231373	0.240315	0.000340968	294	23	11.7529	11.2471	0.0908827	8.08346:8.27499:7.96115:8.05762:1.80929:1
rps8	BC-VR	MA	0.088389	0.369964	0.238912	5.21105e-08	402	51	27.9543	23.0457	0.151655	2.66173:2.74989:1.80434:1.82064:0.379811:1
rps8	BG-VR	MA	0.088389	0.369964	0.238912	5.21105e-08	402	51	27.9543	23.0457	0.151655	2.66173:2.74989:1.80434:1.82064:0.379811:1
rps8	BH-VR	MA	0.088389	0.369964	0.238912	5.21105e-08	402	51	27.9543	23.0457	0.151655	2.66173:2.74989:1.80434:1.82064:0.379811:1
rps8	BS-VR	MA	0.088389	0.369964	0.238912	5.21105e-08	402	51	27.9543	23.0457	0.151655	2.66173:2.74989:1.80434:1.82064:0.379811:1
ccsA	BG-EN	MA	0.073481	0.307855	0.238687	3.92849e-13	960	93	49.6158	43.3842	0.123739	1.18372:1.28926:0.842896:0.869407:0.352163:1
rps11	BC-CE	MA	0.0738803	0.312839	0.236161	9.76601e-08	414	45	26.2592	18.7408	0.133293	2.737:2.67451:1.99129:2.00565:0.449919:1
rps11	BG-CE	MA	0.0738803	0.312839	0.236161	9.76601e-08	414	45	26.2592	18.7408	0.133293	2.737:2.67451:1.99129:2.00565:0.449919:1
rps11	BH-CE	MA	0.0738803	0.312839	0.236161	9.76601e-08	414	45	26.2592	18.7408	0.133293	2.737:2.67451:1.99129:2.00565:0.449919:1
rps11	BS-CE	MA	0.0738803	0.312839	0.236161	9.76601e-08	414	45	26.2592	18.7408	0.133293	2.737:2.67451:1.99129:2.00565:0.449919:1
rps3	BP-CE	MA	0.076522	0.328599	0.232873	1.98481e-09	654	64	30.7961	33.2039	0.121297	2.21558:3.62547:1.01203:1.98501:0.781492:1
ccsA	BP-AC	MA	0.106169	0.460758	0.230422	6.61936e-19	960	126	68.5334	57.4666	0.182604	1.20341:1.7343:0.528943:0.585698:0.506708:1
rps14	BP-EN	MA	0.0341978	0.149189	0.229225	0.00204666	300	17	9.99099	7.00901	0.0625175	15.0881:9.34112:4.84:5.25486:0.01:1
rpoC2	BP-VR	MA	0.0729156	0.320101	0.227789	1.00247e-58	4083	432	234.422	197.578	0.125508	1.59243:1.40375:0.67728:0.974651:0.445637:1
ycf4	BC-CE	MA	0.0548943	0.241022	0.227756	3.99235e-08	552	46	27.0342	18.9658	0.100511	2.27839:1.89596:1.20187:1.27848:0.260058:1
ycf4	BH-CE	MA	0.0548943	0.241022	0.227756	3.99235e-08	552	46	27.0342	18.9658	0.100511	2.27839:1.89596:1.20187:1.27848:0.260058:1
rps15	BC-VR	MA	0.104402	0.459666	0.227126	5.89142e-07	261	38	22.8003	15.1997	0.194683	4.9061:1.91157:0.662063:0.694666:1.67618:1
rps15	BH-VR	MA	0.104402	0.459666	0.227126	5.89142e-07	261	38	22.8003	15.1997	0.194683	4.9061:1.91157:0.662063:0.694666:1.67618:1
atpF	BC-EN	MA	0.0431131	0.190687	0.226093	3.95113e-06	552	36	19.7716	16.2284	0.0749842	2.24161:2.17519:1.34168:1.3945:0.138544:1
atpF	BH-EN	MA	0.0431131	0.190687	0.226093	3.95113e-06	552	36	19.7716	16.2284	0.0749842	2.24161:2.17519:1.34168:1.3945:0.138544:1
atpF	BS-EN	MA	0.0431131	0.190687	0.226093	3.95113e-06	552	36	19.7716	16.2284	0.0749842	2.24161:2.17519:1.34168:1.3945:0.138544:1
petL	BG-CE	MA	0.0741699	0.33084	0.224186	0.00207122	93	10	6.00254	3.99746	0.138813	4.99119:5.60476:2.3286:2.328:0.278545:1
petL	BS-CE	MA	0.0741699	0.33084	0.224186	0.00207122	93	10	6.00254	3.99746	0.138813	4.99119:5.60476:2.3286:2.328:0.278545:1
rps15	BC-AC	MA	0.0864799	0.386038	0.224019	2.35139e-06	261	32	18.3714	13.6286	0.155959	2.62955:1.43544:0.642186:0.635918:0.811661:1
rps15	BH-AC	MA	0.0864799	0.386038	0.224019	2.35139e-06	261	32	18.3714	13.6286	0.155959	2.62955:1.43544:0.642186:0.635918:0.811661:1
ycf1	BP-EN	MA	0.0122961	0.0549137	0.223916	0.00016956	1002	22	13.3663	8.63367	0.0232667	2.096:2.63664:1.19586:1.2294:0.211824:1
rps8	BC-AC	MA	0.0944082	0.422343	0.223534	1.17628e-09	402	54	29.2975	24.7025	0.16313	1.5402:2.35373:0.951641:0.833632:0.336978:1
rps8	BG-AC	MA	0.0944082	0.422343	0.223534	1.17628e-09	402	54	29.2975	24.7025	0.16313	1.5402:2.35373:0.951641:0.833632:0.336978:1
rps8	BH-AC	MA	0.0944082	0.422343	0.223534	1.17628e-09	402	54	29.2975	24.7025	0.16313	1.5402:2.35373:0.951641:0.833632:0.336978:1
rps8	BS-AC	MA	0.0944082	0.422343	0.223534	1.17628e-09	402	54	29.2975	24.7025	0.16313	1.5402:2.35373:0.951641:0.833632:0.336978:1
ccsA	BS-EN	MA	0.0706929	0.317878	0.22239	4.24936e-14	960	92	50.7464	41.2536	0.123789	1.18323:1.28931:0.826027:0.869295:0.341458:1
atpF	BP-VR	MA	0.0608471	0.273647	0.222356	1.62249e-08	552	51	29.7884	21.2116	0.111485	3.18812:2.00815:0.911071:1.09782:0.375032:1
ccsA	BG-VR	MA	0.101815	0.457974	0.222316	6.94265e-20	960	125	68.1576	56.8424	0.176774	1.45541:1.89653:0.827967:0.914389:0.590737:1
ndhG	BC-AC	MA	0.103666	0.468254	0.221389	9.19783e-12	525	69	38.501	30.499	0.183303	1.67311:1.85225:1.16938:1.46918:0.104189:1
ndhG	BH-AC	MA	0.103666	0.468254	0.221389	9.19783e-12	525	69	38.501	30.499	0.183303	1.67311:1.85225:1.16938:1.46918:0.104189:1
atpF	BG-CE	MA	0.0715176	0.323809	0.220864	5.78448e-10	552	57	32.1921	24.8079	0.127718	2.43789:2.1462:1.45279:1.4538:0.32258:1
rpoC2	BP-AC	MA	0.063756	0.288946	0.22065	1.76649e-55	4083	395	221.777	173.223	0.113359	1.74286:1.2576:0.225227:0.740122:0.5201:1
rps15	BC-EN	MA	0.0790631	0.358798	0.220355	1.33696e-05	261	28	14.4822	13.5178	0.132489	2.73598:2.53096:1.95953:2.89716:1.15178:1
rps15	BH-EN	MA	0.0790631	0.358798	0.220355	1.33696e-05	261	28	14.4822	13.5178	0.132489	2.73598:2.53096:1.95953:2.89716:1.15178:1
rps8	BP-EN	MA	0.0521699	0.236895	0.220223	1.71433e-06	402	33	18.1213	14.8787	0.0912377	0.965917:1.48823:0.562742:0.686759:0.0996168:1
rps14	BP-CE	MA	0.0343386	0.155964	0.220169	0.000379193	300	18	11.36	6.64005	0.0676167	16.3617:5.70185:1.02956:1.02956:1.01174:1
rpoA	BS-VR	MA	0.0910586	0.416319	0.218723	1.05013e-18	981	118	61.2521	56.7479	0.153181	2.20025:2.07061:1.48663:1.56793:0.276312:1
accD	BP-CE	MA	0.058566	0.269088	0.217646	6.7567e-15	1257	102	48.7052	53.2948	0.0934925	1.70316:1.62959:1.22279:1.33272:0.334364:1
rps18	BC-EN	MA	0.0339796	0.156358	0.217319	0.00157943	294	16	8.81427	7.18573	0.0597362	4.29969:5.75179:3.2527:3.43074:1.0128:1
rps18	BH-EN	MA	0.0339796	0.156358	0.217319	0.00157943	294	16	8.81427	7.18573	0.0597362	4.29969:5.75179:3.2527:3.43074:1.0128:1
rps8	BP-VR	MA	0.0843881	0.389583	0.216611	1.29084e-09	402	51	29.17	21.83	0.152896	2.60381:2.71851:1.76495:1.78215:0.38432:1
ccsA	BC-EN	MA	0.0732241	0.338145	0.216546	4.66605e-15	960	95	52.7071	42.2929	0.129524	1.17874:1.25122:0.85191:0.883643:0.319821:1
ccsA	BH-EN	MA	0.0732241	0.338145	0.216546	4.66605e-15	960	95	52.7071	42.2929	0.129524	1.17874:1.25122:0.85191:0.883643:0.319821:1
ndhD	BG-AC	MA	0.0791714	0.365615	0.216543	1.09021e-25	1434	163	98.186	64.814	0.149926	1.68341:2.25062:0.791301:1.178:0.270101:1
rps11	BP-CE	MA	0.0743148	0.345201	0.21528	1.15718e-08	414	47	28.5161	18.4839	0.141852	3.00617:2.81549:2.05458:2.06833:0.520271:1
rpoA	BC-VR	MA	0.0891543	0.415221	0.214715	7.93489e-19	981	117	61.455	55.545	0.151746	2.15456:1.99628:1.40153:1.43504:0.31855:1
rpoA	BH-VR	MA	0.0891543	0.415221	0.214715	7.93489e-19	981	117	61.455	55.545	0.151746	2.15456:1.99628:1.40153:1.43504:0.31855:1
ndhJ	BP-EN	MA	0.0318685	0.148453	0.214671	5.40186e-05	474	24	13.406	10.594	0.0567735	2.82093:2.94026:1.84122:1.91167:0.423696:1
ccsA	BS-VR	MA	0.0986603	0.459708	0.214615	1.63331e-20	960	123	68.0458	54.9542	0.174462	1.48051:1.97643:0.802911:0.912808:0.647178:1
rpoA	BG-VR	MA	0.0891444	0.415548	0.214522	7.64998e-19	981	117	61.4599	55.5401	0.151764	2.17397:2.01539:1.41668:1.50228:0.287987:1
rpoA	BP-VR	MA	0.0875255	0.409593	0.213689	1.18566e-18	981	115	60.3704	54.6296	0.149051	2.27616:2.14336:1.54281:1.62704:0.30205:1
atpF	BP-EN	MA	0.0409395	0.19282	0.21232	1.09672e-06	552	35	19.3576	15.6424	0.0725423	1.26821:1.21673:0.88245:0.959267:0.0832819:1
atpF	BC-CE	MA	0.0684442	0.323178	0.211785	3.52045e-10	552	56	32.3013	23.6987	0.125505	2.39302:2.04311:1.33564:1.33694:0.347699:1
atpF	BH-CE	MA	0.0684442	0.323178	0.211785	3.52045e-10	552	56	32.3013	23.6987	0.125505	2.39302:2.04311:1.33564:1.33694:0.347699:1
atpF	BS-CE	MA	0.0684442	0.323178	0.211785	3.52045e-10	552	56	32.3013	23.6987	0.125505	2.39302:2.04311:1.33564:1.33694:0.347699:1
rps2	BP-CE	MA	0.0381884	0.180415	0.21167	1.26528e-07	708	43	23.5771	19.4229	0.0672622	3.03527:2.91814:2.14777:2.66574:0.262218:1
rpoC2	BS-VR	MA	0.0707912	0.335658	0.210903	7.79904e-65	4083	431	238.303	192.697	0.125583	1.51986:1.4359:0.940576:1.14941:0.327975:1
rps14	BC-EN	MA	0.0347017	0.165183	0.210081	0.000721102	300	18	10.9399	7.06014	0.0667455	14.7398:10.2848:5.74834:6.12167:0.01:1
rps14	BG-EN	MA	0.0347017	0.165183	0.210081	0.000721102	300	18	10.9399	7.06014	0.0667455	14.7398:10.2848:5.74834:6.12167:0.01:1
rps14	BH-EN	MA	0.0347017	0.165183	0.210081	0.000721102	300	18	10.9399	7.06014	0.0667455	14.7398:10.2848:5.74834:6.12167:0.01:1
rps14	BS-EN	MA	0.0347017	0.165183	0.210081	0.000721102	300	18	10.9399	7.06014	0.0667455	14.7398:10.2848:5.74834:6.12167:0.01:1
rpoC2	BG-VR	MA	0.0708617	0.337371	0.210041	2.17079e-65	4083	432	239.253	192.747	0.125976	1.51837:1.44152:0.960513:1.1619:0.319596:1
ndhD	BS-AC	MA	0.0790892	0.378246	0.209095	1.31413e-26	1434	165	100.832	64.1679	0.153073	1.55127:2.18356:0.654385:1.05359:0.253801:1
rpoC2	BC-VR	MA	0.0719114	0.345121	0.208366	9.99498e-67	4083	439	243.934	195.066	0.128385	1.56702:1.49817:1.0241:1.21459:0.331786:1
rpoC2	BH-VR	MA	0.0719114	0.345121	0.208366	9.99498e-67	4083	439	243.934	195.066	0.128385	1.56702:1.49817:1.0241:1.21459:0.331786:1
ndhD	BC-AC	MA	0.0786132	0.378532	0.207679	3.00954e-27	1434	164	100.091	63.9089	0.152222	1.5499:2.38297:0.544328:1.1125:0.264084:1
ndhD	BH-AC	MA	0.0786132	0.378532	0.207679	3.00954e-27	1434	164	100.091	63.9089	0.152222	1.5499:2.38297:0.544328:1.1125:0.264084:1
rps18	BC-AC	MA	0.0634117	0.305519	0.207554	1.21057e-05	294	28	15.8286	12.1714	0.114871	3.36256:3.50111:2.00431:2.00057:0.350468:1
rps18	BH-AC	MA	0.0634117	0.305519	0.207554	1.21057e-05	294	28	15.8286	12.1714	0.114871	3.36256:3.50111:2.00431:2.00057:0.350468:1
ndhG	BG-AC	MA	0.0971446	0.468388	0.207402	2.60266e-12	525	67	38.4978	28.5022	0.178385	1.5624:1.72414:1.10055:1.39169:0.0995726:1
ndhG	BS-AC	MA	0.0971446	0.468388	0.207402	2.60266e-12	525	67	38.4978	28.5022	0.178385	1.5624:1.72414:1.10055:1.39169:0.0995726:1
ccsA	BG-AC	MA	0.10435	0.504774	0.206727	4.00221e-22	960	128	73.4489	54.5511	0.191537	1.33311:1.79702:0.653585:0.722021:0.39793:1
accD	BG-EN	MA	0.0460525	0.223509	0.206043	8.99009e-13	1257	82	39.8035	42.1965	0.0749301	0.755001:0.81669:0.586876:0.591853:0.285478:1
accD	BG-VR	MA	0.0460525	0.223509	0.206043	8.99009e-13	1257	82	39.8035	42.1965	0.0749301	0.755001:0.81669:0.586876:0.591853:0.285478:1
ccsA	BS-AC	MA	0.103928	0.508284	0.204468	3.82143e-22	960	128	73.7682	54.2318	0.191917	1.24181:1.70016:0.57951:0.657669:0.372851:1
psaJ	BC-CE	MA	0.033029	0.161936	0.203964	0.0289231	126	8	5.34354	2.65646	0.0705306	1.61571:1.19618:0.745072:0.745072:0.569824:1
psaJ	BG-CE	MA	0.033029	0.161936	0.203964	0.0289231	126	8	5.34354	2.65646	0.0705306	1.61571:1.19618:0.745072:0.745072:0.569824:1
psaJ	BH-CE	MA	0.033029	0.161936	0.203964	0.0289231	126	8	5.34354	2.65646	0.0705306	1.61571:1.19618:0.745072:0.745072:0.569824:1
psaJ	BP-CE	MA	0.033029	0.161936	0.203964	0.0289231	126	8	5.34354	2.65646	0.0705306	1.61571:1.19618:0.745072:0.745072:0.569824:1
psaJ	BS-CE	MA	0.033029	0.161936	0.203964	0.0289231	126	8	5.34354	2.65646	0.0705306	1.61571:1.19618:0.745072:0.745072:0.569824:1
rps14	BC-CE	MA	0.0346446	0.170174	0.203584	0.00012598	300	19	12.2964	6.70359	0.0714947	15.672:6.62277:1.57607:1.57607:0.904339:1
rps14	BG-CE	MA	0.0346446	0.170174	0.203584	0.00012598	300	19	12.2964	6.70359	0.0714947	15.672:6.62277:1.57607:1.57607:0.904339:1
rps14	BH-CE	MA	0.0346446	0.170174	0.203584	0.00012598	300	19	12.2964	6.70359	0.0714947	15.672:6.62277:1.57607:1.57607:0.904339:1
rps14	BS-CE	MA	0.0346446	0.170174	0.203584	0.00012598	300	19	12.2964	6.70359	0.0714947	15.672:6.62277:1.57607:1.57607:0.904339:1
rpoC2	BG-AC	MA	0.0625766	0.308176	0.203055	1.10217e-62	4083	398	227.028	170.972	0.114734	1.53934:1.23939:0.423899:0.823952:0.393501:1
ccsA	BC-VR	MA	0.100974	0.498704	0.202473	3.83869e-22	960	127	71.7822	55.2178	0.183848	1.46559:1.79793:0.894367:0.98195:0.553532:1
ccsA	BH-VR	MA	0.100974	0.498704	0.202473	3.83869e-22	960	127	71.7822	55.2178	0.183848	1.46559:1.79793:0.894367:0.98195:0.553532:1
ndhD	BP-CE	MA	0.0718138	0.35508	0.202247	4.23966e-25	1434	150	91.6655	58.3345	0.140127	4.64689:6.86222:1.48778:2.32819:1.2804:1
rpl14	BC-AC	MA	0.0648824	0.32139	0.201881	8.86316e-08	366	38	22.4509	15.5491	0.122776	3.93326:4.60474:2.30465:2.48134:0.200573:1
rpl14	BH-AC	MA	0.0648824	0.32139	0.201881	8.86316e-08	366	38	22.4509	15.5491	0.122776	3.93326:4.60474:2.30465:2.48134:0.200573:1
rpoA	BS-CE	MA	0.0688505	0.341623	0.20154	3.64676e-16	981	95	50.6456	44.3544	0.119879	2.13302:2.4197:1.38351:1.91966:0.360721:1
rpoC2	BS-AC	MA	0.0626153	0.311206	0.201202	7.12857e-63	4083	399	227.871	171.129	0.115143	1.53258:1.25707:0.468544:0.852051:0.3823:1
ndhG	BC-EN	MA	0.0522094	0.260787	0.2002	1.83829e-08	525	42	24.1746	17.8254	0.0967473	1.13264:1.48347:0.746269:0.777824:0.511576:1
ndhG	BH-EN	MA	0.0522094	0.260787	0.2002	1.83829e-08	525	42	24.1746	17.8254	0.0967473	1.13264:1.48347:0.746269:0.777824:0.511576:1
rpoA	BC-CE	MA	0.0675549	0.337479	0.200175	2.13463e-16	981	94	50.3157	43.6843	0.118129	2.29245:2.53469:1.56842:2.07685:0.376892:1
rpoA	BH-CE	MA	0.0675549	0.337479	0.200175	2.13463e-16	981	94	50.3157	43.6843	0.118129	2.29245:2.53469:1.56842:2.07685:0.376892:1
accD	BS-EN	MA	0.0448844	0.224521	0.199912	4.94999e-13	1257	81	39.8809	41.1191	0.0740581	0.735423:0.782527:0.579435:0.584303:0.276012:1
accD	BS-VR	MA	0.0448844	0.224521	0.199912	4.94999e-13	1257	81	39.8809	41.1191	0.0740581	0.735423:0.782527:0.579435:0.584303:0.276012:1
rps8	BP-AC	MA	0.090116	0.450931	0.199844	1.49534e-10	402	54	30.7389	23.2611	0.165496	1.47576:2.38464:0.886304:0.767362:0.334242:1
rpoC2	BC-AC	MA	0.0631659	0.316105	0.199826	1.86262e-64	4083	402	229.186	172.814	0.116155	1.51037:1.29424:0.57918:0.892604:0.367798:1
rpoC2	BH-AC	MA	0.0631659	0.316105	0.199826	1.86262e-64	4083	402	229.186	172.814	0.116155	1.51037:1.29424:0.57918:0.892604:0.367798:1
ndhD	BG-CE	MA	0.0705164	0.353535	0.199461	2.27674e-25	1434	149	92.5873	56.4127	0.140317	3.81145:6.63312:0.713701:2.0209:1.10921:1
ndhD	BP-AC	MA	0.0767164	0.385555	0.198976	3.93743e-28	1434	164	102.652	61.3481	0.153858	2.19564:3.06675:0.880666:1.36032:0.371751:1
rpoA	BC-EN	MA	0.044467	0.223729	0.198754	6.3486e-12	981	67	35.2401	31.7599	0.0768572	1.65045:1.67322:1.2313:1.37803:0.428217:1
rpoA	BH-EN	MA	0.044467	0.223729	0.198754	6.3486e-12	981	67	35.2401	31.7599	0.0768572	1.65045:1.67322:1.2313:1.37803:0.428217:1
rps15	BG-AC	MA	0.0817588	0.411555	0.198658	9.42836e-07	261	32	19.8194	12.1806	0.162322	4.16131:2.17142:0.815556:0.807855:0.759229:1
rps15	BS-AC	MA	0.0817588	0.411555	0.198658	9.42836e-07	261	32	19.8194	12.1806	0.162322	4.16131:2.17142:0.815556:0.807855:0.759229:1
rpoA	BP-EN	MA	0.0410064	0.206621	0.198462	5.46585e-11	981	62	32.3892	29.6108	0.070546	1.58508:1.7717:1.10364:1.34077:0.653775:1
rpoA	BS-EN	MA	0.0444457	0.224518	0.197961	5.58852e-12	981	67	35.2292	31.7708	0.0768584	1.62755:1.7072:1.19987:1.36159:0.472668:1
ndhG	BC-CE	MA	0.065073	0.328901	0.19785	4.0235e-09	525	49	27.9887	21.0113	0.120102	0.940045:1.16762:0.613151:1.0095:0.180198:1
ndhG	BH-CE	MA	0.065073	0.328901	0.19785	4.0235e-09	525	49	27.9887	21.0113	0.120102	0.940045:1.16762:0.613151:1.0095:0.180198:1
petN	BC-AC	MA	0.0326523	0.165058	0.197823	0.0837571	87	5	3.56032	1.43968	0.0761482	2.72198:4.86576:2.54258:2.52658:0.633956:1
petN	BG-AC	MA	0.0326523	0.165058	0.197823	0.0837571	87	5	3.56032	1.43968	0.0761482	2.72198:4.86576:2.54258:2.52658:0.633956:1
petN	BH-AC	MA	0.0326523	0.165058	0.197823	0.0837571	87	5	3.56032	1.43968	0.0761482	2.72198:4.86576:2.54258:2.52658:0.633956:1
petN	BP-AC	MA	0.0326523	0.165058	0.197823	0.0837571	87	5	3.56032	1.43968	0.0761482	2.72198:4.86576:2.54258:2.52658:0.633956:1
petN	BS-AC	MA	0.0326523	0.165058	0.197823	0.0837571	87	5	3.56032	1.43968	0.0761482	2.72198:4.86576:2.54258:2.52658:0.633956:1
psbJ	BP-VR	MA	0.0221302	0.112587	0.196561	0.0117181	120	5	3.09756	1.90244	0.0440612	2.22669:3.42802:1.67031:1.65288:0.265809:1
rpoA	BG-CE	MA	0.0671788	0.341834	0.196525	1.78371e-16	981	94	50.6419	43.3581	0.118453	2.09749:2.33123:1.4088:1.90602:0.332125:1
rps15	BP-AC	MA	0.0762479	0.388108	0.196461	1.21138e-06	261	31	19.7764	11.2236	0.156443	5.15487:2.57115:0.87892:0.869709:0.539166:1
cemA	BP-AC	MA	0.0500553	0.254906	0.196368	9.35651e-06	396	29	14.9323	14.0677	0.085389	1.37731:2.5387:0.800491:1.38793:1.73747:1
ndhD	BC-CE	MA	0.0708168	0.36202	0.195615	1.05802e-26	1434	151	95.0833	55.9167	0.143503	3.76593:6.71728:0.690579:1.51071:1.24447:1
ndhD	BH-CE	MA	0.0708168	0.36202	0.195615	1.05802e-26	1434	151	95.0833	55.9167	0.143503	3.76593:6.71728:0.690579:1.51071:1.24447:1
ndhG	BG-CE	MA	0.0656586	0.335679	0.195599	1.95588e-09	525	49	27.7208	21.2792	0.120491	0.86132:1.25346:0.475824:0.992839:0.217485:1
ndhG	BS-CE	MA	0.0656586	0.335679	0.195599	1.95588e-09	525	49	27.7208	21.2792	0.120491	0.86132:1.25346:0.475824:0.992839:0.217485:1
rpoA	BP-CE	MA	0.065502	0.336556	0.194624	3.89604e-16	981	92	49.8466	42.1534	0.116213	2.23403:2.57694:1.41501:2.0525:0.423079:1
ccsA	BC-AC	MA	0.103149	0.530971	0.194265	1.67903e-23	960	128	74.7792	53.2208	0.194886	1.29291:1.74705:0.61715:0.67477:0.413187:1
ccsA	BH-AC	MA	0.103149	0.530971	0.194265	1.67903e-23	960	128	74.7792	53.2208	0.194886	1.29291:1.74705:0.61715:0.67477:0.413187:1
rps18	BP-VR	MA	0.0497219	0.256204	0.194072	5.32134e-05	294	23	12.9218	10.0782	0.0908635	7.36708:7.55867:6.49784:6.56172:1.19069:1
ndhG	BP-AC	MA	0.0912157	0.473205	0.192762	6.87746e-13	525	66	38.7746	27.2254	0.173495	1.40154:1.68584:0.884051:1.27714:0.0840541:1
ndhD	BS-CE	MA	0.070329	0.365835	0.192242	8.6934e-27	1434	151	95.5958	55.4042	0.143934	3.444:6.28389:0.554648:1.79816:1.03052:1
rps18	BG-AC	MA	0.0580142	0.303257	0.191304	6.30749e-06	294	27	15.8111	11.1889	0.110203	3.21585:3.2677:1.91226:1.90839:0.34475:1
rps18	BS-AC	MA	0.0580142	0.303257	0.191304	6.30749e-06	294	27	15.8111	11.1889	0.110203	3.21585:3.2677:1.91226:1.90839:0.34475:1
ndhJ	BC-EN	MA	0.0311949	0.163303	0.191025	1.7888e-05	474	25	14.6994	10.3006	0.0594933	2.23149:2.34125:1.39356:1.44432:0.263562:1
ndhJ	BG-EN	MA	0.0311949	0.163303	0.191025	1.7888e-05	474	25	14.6994	10.3006	0.0594933	2.23149:2.34125:1.39356:1.44432:0.263562:1
ndhJ	BH-EN	MA	0.0311949	0.163303	0.191025	1.7888e-05	474	25	14.6994	10.3006	0.0594933	2.23149:2.34125:1.39356:1.44432:0.263562:1
ndhJ	BS-EN	MA	0.0311949	0.163303	0.191025	1.7888e-05	474	25	14.6994	10.3006	0.0594933	2.23149:2.34125:1.39356:1.44432:0.263562:1
accD	BC-EN	MA	0.0446089	0.233837	0.190769	1.52525e-14	1257	82	41.1223	40.8777	0.0750767	0.706262:0.759865:0.555939:0.562674:0.299597:1
accD	BC-VR	MA	0.0446089	0.233837	0.190769	1.52525e-14	1257	82	41.1223	40.8777	0.0750767	0.706262:0.759865:0.555939:0.562674:0.299597:1
accD	BH-EN	MA	0.0446089	0.233837	0.190769	1.52525e-14	1257	82	41.1223	40.8777	0.0750767	0.706262:0.759865:0.555939:0.562674:0.299597:1
accD	BH-VR	MA	0.0446089	0.233837	0.190769	1.52525e-14	1257	82	41.1223	40.8777	0.0750767	0.706262:0.759865:0.555939:0.562674:0.299597:1
rps12	BC-CE	MA	0.0124113	0.065265	0.190168	0.00812776	369	9	5.66894	3.33106	0.0253343	30:25.7412:20.1455:20.1455:0.01:1
rps12	BH-CE	MA	0.0124113	0.065265	0.190168	0.00812776	369	9	5.66894	3.33106	0.0253343	30:25.7412:20.1455:20.1455:0.01:1
rpoA	BG-EN	MA	0.042856	0.225476	0.190069	2.95638e-12	981	66	35.356	30.644	0.075701	1.57983:1.63404:1.17479:1.33084:0.450477:1
petL	BG-VR	MA	0.0590013	0.310459	0.190046	0.010785	93	9	5.94842	3.05158	0.126974	8.58559:8.66614:4.52163:4.51869:0.193233:1
petL	BS-VR	MA	0.0590013	0.310459	0.190046	0.010785	93	9	5.94842	3.05158	0.126974	8.58559:8.66614:4.52163:4.51869:0.193233:1
atpF	BP-CE	MA	0.0603611	0.319353	0.18901	6.13054e-11	552	53	32.2415	20.7585	0.119138	2.78759:2.33405:1.46994:1.47589:0.349486:1
rpl14	BG-AC	MA	0.0611187	0.323578	0.188884	3.67231e-08	366	37	22.3813	14.6187	0.119992	4.8954:5.74577:3.11662:3.31685:0.255149:1
rpl14	BS-AC	MA	0.0611187	0.323578	0.188884	3.67231e-08	366	37	22.3813	14.6187	0.119992	4.8954:5.74577:3.11662:3.31685:0.255149:1
accD	BP-AC	MA	0.061682	0.328074	0.188013	2.13882e-19	1257	111	54.4546	56.5454	0.102521	2.17518:2.05529:1.63465:2.00148:0.830537:1
rpl14	BP-AC	MA	0.0605526	0.323313	0.187288	3.28127e-08	366	37	22.4004	14.5996	0.119205	4.14215:4.68463:2.82795:3.25531:0.269889:1
petL	BC-AC	MA	0.0401655	0.215302	0.186554	0.0181381	93	7	4.75593	2.24407	0.0897895	13.4494:14.8933:24.4253:25.0317:2.49943:1
petL	BH-AC	MA	0.0401655	0.215302	0.186554	0.0181381	93	7	4.75593	2.24407	0.0897895	13.4494:14.8933:24.4253:25.0317:2.49943:1
rpl14	BC-EN	MA	0.0510568	0.275421	0.185377	2.16264e-07	366	32	19.2921	12.7079	0.100332	0.845232:1.34783:0.542468:0.579848:0.124627:1
rpl14	BH-EN	MA	0.0510568	0.275421	0.185377	2.16264e-07	366	32	19.2921	12.7079	0.100332	0.845232:1.34783:0.542468:0.579848:0.124627:1
ndhB	BG-EN	MA	0.0036503	0.0197414	0.184906	0.00348554	1530	13	9.33421	3.66579	0.00880123	2.37058:0.150372:0.135801:0.135801:0.423241:1
ndhB	BP-EN	MA	0.0036503	0.0197414	0.184906	0.00348554	1530	13	9.33421	3.66579	0.00880123	2.37058:0.150372:0.135801:0.135801:0.423241:1
ndhB	BS-EN	MA	0.0036503	0.0197414	0.184906	0.00348554	1530	13	9.33421	3.66579	0.00880123	2.37058:0.150372:0.135801:0.135801:0.423241:1
cemA	BC-AC	MA	0.0462784	0.250346	0.184858	9.54672e-07	396	28	15.0066	12.9934	0.0821816	1.48289:2.83759:0.82051:1.35276:1.44761:1
cemA	BG-AC	MA	0.0462784	0.250346	0.184858	9.54672e-07	396	28	15.0066	12.9934	0.0821816	1.48289:2.83759:0.82051:1.35276:1.44761:1
cemA	BH-AC	MA	0.0462784	0.250346	0.184858	9.54672e-07	396	28	15.0066	12.9934	0.0821816	1.48289:2.83759:0.82051:1.35276:1.44761:1
cemA	BS-AC	MA	0.0462784	0.250346	0.184858	9.54672e-07	396	28	15.0066	12.9934	0.0821816	1.48289:2.83759:0.82051:1.35276:1.44761:1
ndhA	BC-CE	MA	0.0593609	0.323658	0.183406	9.59704e-20	1062	101	63.0387	37.9613	0.121064	5.24921:6.03413:2.96073:3.19721:0.713056:1
ndhA	BH-CE	MA	0.0593609	0.323658	0.183406	9.59704e-20	1062	101	63.0387	37.9613	0.121064	5.24921:6.03413:2.96073:3.19721:0.713056:1
rps18	BG-EN	MA	0.0288207	0.157992	0.182419	0.000801206	294	15	8.8858	6.1142	0.0558892	3.93184:4.9331:3.04382:3.2094:0.969515:1
rps18	BS-EN	MA	0.0288207	0.157992	0.182419	0.000801206	294	15	8.8858	6.1142	0.0558892	3.93184:4.9331:3.04382:3.2094:0.969515:1
petL	BC-EN	MA	0.0550596	0.302314	0.182127	0.0084208	93	9	5.91772	3.08228	0.119118	4.77056:5.06165:3.71977:3.79313:0.126445:1
petL	BH-EN	MA	0.0550596	0.302314	0.182127	0.0084208	93	9	5.91772	3.08228	0.119118	4.77056:5.06165:3.71977:3.79313:0.126445:1
accD	BG-AC	MA	0.0598625	0.329058	0.181921	2.29123e-20	1257	111	59.845	51.155	0.1071	2.36739:2.3285:1.74474:1.91277:0.655311:1
rps11	BC-AC	MA	0.0454309	0.250291	0.181512	8.74447e-08	414	33	21.1132	11.8868	0.0953758	2.64227:2.10721:1.29261:1.35121:0.536372:1
rps11	BG-AC	MA	0.0454309	0.250291	0.181512	8.74447e-08	414	33	21.1132	11.8868	0.0953758	2.64227:2.10721:1.29261:1.35121:0.536372:1
rps11	BH-AC	MA	0.0454309	0.250291	0.181512	8.74447e-08	414	33	21.1132	11.8868	0.0953758	2.64227:2.10721:1.29261:1.35121:0.536372:1
rps11	BS-AC	MA	0.0454309	0.250291	0.181512	8.74447e-08	414	33	21.1132	11.8868	0.0953758	2.64227:2.10721:1.29261:1.35121:0.536372:1
accD	BG-CE	MA	0.0559735	0.309205	0.181024	4.60469e-20	1257	105	57.0282	47.9718	0.100818	1.91138:1.88685:1.41724:1.4914:0.280031:1
rpl36	BC-VR	MA	0.0523368	0.289759	0.180622	0.00377238	111	10	6.72325	3.27675	0.116534	5.06801:2.72047:1.47707:1.46529:0.150087:1
rpl36	BG-VR	MA	0.0523368	0.289759	0.180622	0.00377238	111	10	6.72325	3.27675	0.116534	5.06801:2.72047:1.47707:1.46529:0.150087:1
rpl36	BH-VR	MA	0.0523368	0.289759	0.180622	0.00377238	111	10	6.72325	3.27675	0.116534	5.06801:2.72047:1.47707:1.46529:0.150087:1
rpl36	BS-VR	MA	0.0523368	0.289759	0.180622	0.00377238	111	10	6.72325	3.27675	0.116534	5.06801:2.72047:1.47707:1.46529:0.150087:1
petL	BG-AC	MA	0.0398996	0.223244	0.178726	0.0164069	93	7	4.77596	2.22404	0.0907508	10.7434:17.067:20.1373:20.8338:2.1452:1
petL	BS-AC	MA	0.0398996	0.223244	0.178726	0.0164069	93	7	4.77596	2.22404	0.0907508	10.7434:17.067:20.1373:20.8338:2.1452:1
accD	BS-AC	MA	0.0586092	0.329592	0.177824	1.22338e-20	1257	110	59.9293	50.0707	0.106163	2.3246:2.26723:1.70163:1.8728:0.657011:1
ndhD	BG-VR	MA	0.080037	0.450803	0.177543	9.4372e-35	1434	176	115.237	60.7627	0.173432	3.66467:6.17391:0.77777:2.14049:0.811113:1
ndhG	BG-EN	MA	0.0465276	0.262713	0.177104	3.83957e-09	525	40	24.1599	15.8401	0.0925052	0.997656:1.3168:0.674028:0.707617:0.498031:1
ndhG	BS-EN	MA	0.0465276	0.262713	0.177104	3.83957e-09	525	40	24.1599	15.8401	0.0925052	0.997656:1.3168:0.674028:0.707617:0.498031:1
accD	BS-CE	MA	0.0547013	0.309631	0.176666	2.47708e-20	1257	104	57.1314	46.8686	0.0998729	1.87589:1.83753:1.37898:1.45494:0.281473:1
ndhK	BC-AC	MA	0.0331116	0.187628	0.176475	4.2364e-08	663	38	22.7763	15.2237	0.0653864	1.73229:2.34048:1.00946:1.06235:0.517207:1
ndhK	BG-AC	MA	0.0331116	0.187628	0.176475	4.2364e-08	663	38	22.7763	15.2237	0.0653864	1.73229:2.34048:1.00946:1.06235:0.517207:1
ndhK	BH-AC	MA	0.0331116	0.187628	0.176475	4.2364e-08	663	38	22.7763	15.2237	0.0653864	1.73229:2.34048:1.00946:1.06235:0.517207:1
ndhK	BS-AC	MA	0.0331116	0.187628	0.176475	4.2364e-08	663	38	22.7763	15.2237	0.0653864	1.73229:2.34048:1.00946:1.06235:0.517207:1
ndhB	BC-VR	MA	0.00698159	0.0396657	0.176011	2.84763e-05	1530	22	14.5455	7.45451	0.015337	2.45742:2.3087:1.69651:1.87034:0.800313:1
ndhB	BH-VR	MA	0.00698159	0.0396657	0.176011	2.84763e-05	1530	22	14.5455	7.45451	0.015337	2.45742:2.3087:1.69651:1.87034:0.800313:1
rps11	BP-AC	MA	0.0460949	0.261935	0.175979	1.94332e-07	414	34	21.9829	12.0171	0.0986568	3.64291:2.72884:1.53395:1.59107:0.967105:1
accD	BC-CE	MA	0.0545422	0.310284	0.175782	2.11516e-20	1257	104	57.1742	46.8258	0.0997327	1.75597:1.70905:1.2951:1.33793:0.28091:1
accD	BH-CE	MA	0.0545422	0.310284	0.175782	2.11516e-20	1257	104	57.1742	46.8258	0.0997327	1.75597:1.70905:1.2951:1.33793:0.28091:1
rpl23	BC-CE	MA	0.0599497	0.342749	0.174908	1.4709e-08	405	38	24.6965	13.3035	0.129267	2.93277:3.20278:2.07193:2.11943:0.176731:1
rpl23	BH-CE	MA	0.0599497	0.342749	0.174908	1.4709e-08	405	38	24.6965	13.3035	0.129267	2.93277:3.20278:2.07193:2.11943:0.176731:1
rpl16	BC-CE	MA	0.0599497	0.342749	0.174908	1.4709e-08	405	38	24.6965	13.3035	0.129267	2.93277:3.20278:2.07193:2.11943:0.176731:1
rpl16	BH-CE	MA	0.0599497	0.342749	0.174908	1.4709e-08	405	38	24.6965	13.3035	0.129267	2.93277:3.20278:2.07193:2.11943:0.176731:1
ndhA	BG-CE	MA	0.0579339	0.33186	0.174574	1.21296e-20	1062	101	64.1744	36.8256	0.12183	5.21248:6.08471:2.87087:3.14274:0.761461:1
ndhA	BS-CE	MA	0.0579339	0.33186	0.174574	1.21296e-20	1062	101	64.1744	36.8256	0.12183	5.21248:6.08471:2.87087:3.14274:0.761461:1
ndhG	BP-CE	MA	0.0619682	0.361422	0.171457	2.65171e-10	525	48	27.9994	20.0006	0.119932	0.628198:1.14081:0.251029:0.875781:0.167322:1
ndhD	BS-VR	MA	0.0798497	0.466648	0.171113	1.10438e-36	1434	178	118.074	59.9259	0.177377	3.30871:5.83825:0.61847:1.91102:0.745481:1
psbL	BC-AC	MA	0.0171524	0.100514	0.170648	0.0496531	114	4	2.68203	1.31797	0.0386391	30:29.0941:23.7283:23.7283:0.01:1
psbL	BG-AC	MA	0.0171524	0.100514	0.170648	0.0496531	114	4	2.68203	1.31797	0.0386391	30:29.0941:23.7283:23.7283:0.01:1
psbL	BH-AC	MA	0.0171524	0.100514	0.170648	0.0496531	114	4	2.68203	1.31797	0.0386391	30:29.0941:23.7283:23.7283:0.01:1
psbL	BP-AC	MA	0.0171524	0.100514	0.170648	0.0496531	114	4	2.68203	1.31797	0.0386391	30:29.0941:23.7283:23.7283:0.01:1
psbL	BS-AC	MA	0.0171524	0.100514	0.170648	0.0496531	114	4	2.68203	1.31797	0.0386391	30:29.0941:23.7283:23.7283:0.01:1
rpl14	BC-VR	MA	0.0704305	0.412814	0.170611	3.20505e-10	366	44	28.6877	15.3123	0.153362	1.90426:1.89129:1.31678:1.34595:0.0925961:1
rpl14	BH-VR	MA	0.0704305	0.412814	0.170611	3.20505e-10	366	44	28.6877	15.3123	0.153362	1.90426:1.89129:1.31678:1.34595:0.0925961:1
accD	BC-AC	MA	0.0584331	0.34312	0.1703	2.11734e-22	1257	111	61.3192	49.6808	0.107879	2.26333:2.22378:1.71162:1.91705:0.706068:1
accD	BH-AC	MA	0.0584331	0.34312	0.1703	2.11734e-22	1257	111	61.3192	49.6808	0.107879	2.26333:2.22378:1.71162:1.91705:0.706068:1
rpoA	BC-AC	MA	0.0684359	0.405013	0.168972	9.11507e-22	981	104	59.5911	44.4089	0.130646	1.65578:1.65791:1.2631:1.28655:0.260131:1
rpoA	BH-AC	MA	0.0684359	0.405013	0.168972	9.11507e-22	981	104	59.5911	44.4089	0.130646	1.65578:1.65791:1.2631:1.28655:0.260131:1
ndhD	BC-VR	MA	0.0796926	0.472313	0.168728	5.02318e-37	1434	177	117.095	59.9046	0.177068	3.4086:6.42734:0.578007:2.38257:0.835197:1
ndhD	BH-VR	MA	0.0796926	0.472313	0.168728	5.02318e-37	1434	177	117.095	59.9046	0.177068	3.4086:6.42734:0.578007:2.38257:0.835197:1
rpoA	BS-AC	MA	0.0684034	0.405821	0.168556	7.77486e-22	981	104	59.5747	44.4253	0.130611	1.63943:1.67972:1.25168:1.27627:0.268981:1
ndhK	BP-AC	MA	0.0311429	0.185315	0.168054	2.54899e-08	663	37	22.7273	14.2727	0.0636899	1.96045:2.65103:1.08968:1.15082:0.399304:1
rpl14	BG-EN	MA	0.0468881	0.279057	0.168023	8.2656e-08	366	31	19.3325	11.6675	0.0974492	1.02133:1.66492:0.620483:0.660302:0.143499:1
rpl14	BS-EN	MA	0.0468881	0.279057	0.168023	8.2656e-08	366	31	19.3325	11.6675	0.0974492	1.02133:1.66492:0.620483:0.660302:0.143499:1
ndhD	BP-VR	MA	0.0757673	0.451538	0.167798	1.78958e-35	1434	171	113.475	57.5251	0.169216	4.87334:7.91136:1.25023:3.36911:1.33854:1
rps3	BC-VR	MA	0.0757603	0.451664	0.167736	2.73941e-16	654	74	42.6188	31.3812	0.145504	2.2101:2.53199:1.48995:1.80691:0.249932:1
rps3	BH-VR	MA	0.0757603	0.451664	0.167736	2.73941e-16	654	74	42.6188	31.3812	0.145504	2.2101:2.53199:1.48995:1.80691:0.249932:1
rps18	BP-EN	MA	0.0312208	0.186776	0.167156	6.81113e-05	294	17	10.4314	6.56856	0.063852	2.22802:2.76036:1.35746:1.40812:0.292689:1
rpoA	BG-AC	MA	0.066736	0.406218	0.164286	3.78527e-22	981	103	59.645	43.355	0.129319	1.60831:1.63076:1.23165:1.25578:0.263671:1
rps2	BC-VR	MA	0.0508875	0.310177	0.164059	8.27446e-14	708	63	38.8669	24.1331	0.105079	2.39734:2.29376:1.62938:1.64515:0.378478:1
rps2	BG-VR	MA	0.0508875	0.310177	0.164059	8.27446e-14	708	63	38.8669	24.1331	0.105079	2.39734:2.29376:1.62938:1.64515:0.378478:1
rps2	BH-VR	MA	0.0508875	0.310177	0.164059	8.27446e-14	708	63	38.8669	24.1331	0.105079	2.39734:2.29376:1.62938:1.64515:0.378478:1
rps2	BS-VR	MA	0.0508875	0.310177	0.164059	8.27446e-14	708	63	38.8669	24.1331	0.105079	2.39734:2.29376:1.62938:1.64515:0.378478:1
rpl23	BG-CE	MA	0.0520796	0.317834	0.163858	7.42482e-09	405	35	23.1978	11.8022	0.11682	2.82113:2.88257:2.00147:2.09638:0.161364:1
rpl23	BS-CE	MA	0.0520796	0.317834	0.163858	7.42482e-09	405	35	23.1978	11.8022	0.11682	2.82113:2.88257:2.00147:2.09638:0.161364:1
rpl16	BG-CE	MA	0.0520796	0.317834	0.163858	7.42482e-09	405	35	23.1978	11.8022	0.11682	2.82113:2.88257:2.00147:2.09638:0.161364:1
rpl16	BS-CE	MA	0.0520796	0.317834	0.163858	7.42482e-09	405	35	23.1978	11.8022	0.11682	2.82113:2.88257:2.00147:2.09638:0.161364:1
rpoA	BP-AC	MA	0.0651379	0.39814	0.163606	7.9622e-22	981	101	58.6001	42.3999	0.126549	1.67558:1.72272:1.28002:1.30433:0.303734:1
ndhA	BP-CE	MA	0.0564549	0.347965	0.162243	2.99684e-22	1062	103	67.5613	35.4387	0.12532	4.28081:5.18939:2.1977:2.42233:0.541863:1
cemA	BP-EN	MA	0.0416925	0.257375	0.161992	7.91007e-05	396	21	8.84798	12.152	0.0644478	0.352519:5.20365:0.145292:1.66557:6.48333:1
ndhB	BG-VR	MA	0.00621561	0.0386037	0.161011	1.43063e-05	1530	21	14.3856	6.61441	0.0146157	2.63611:2.49645:1.73641:1.88709:0.605625:1
ndhB	BP-VR	MA	0.00621561	0.0386037	0.161011	1.43063e-05	1530	21	14.3856	6.61441	0.0146157	2.63611:2.49645:1.73641:1.88709:0.605625:1
ndhB	BS-VR	MA	0.00621561	0.0386037	0.161011	1.43063e-05	1530	21	14.3856	6.61441	0.0146157	2.63611:2.49645:1.73641:1.88709:0.605625:1
rps4	BC-EN	MA	0.0307205	0.191358	0.160539	2.90085e-08	603	34	20.5156	13.4844	0.062254	0.95127:1.13832:0.715342:0.730062:0.812434:1
rps4	BG-EN	MA	0.0307205	0.191358	0.160539	2.90085e-08	603	34	20.5156	13.4844	0.062254	0.95127:1.13832:0.715342:0.730062:0.812434:1
rps4	BH-EN	MA	0.0307205	0.191358	0.160539	2.90085e-08	603	34	20.5156	13.4844	0.062254	0.95127:1.13832:0.715342:0.730062:0.812434:1
rps4	BP-EN	MA	0.0307205	0.191358	0.160539	2.90085e-08	603	34	20.5156	13.4844	0.062254	0.95127:1.13832:0.715342:0.730062:0.812434:1
rps4	BS-EN	MA	0.0307205	0.191358	0.160539	2.90085e-08	603	34	20.5156	13.4844	0.062254	0.95127:1.13832:0.715342:0.730062:0.812434:1
rps3	BG-VR	MA	0.0760475	0.479267	0.158674	2.32341e-18	654	76	45.0125	30.9875	0.151577	2.08882:2.35715:1.44557:1.73496:0.230389:1
rps3	BS-VR	MA	0.0760475	0.479267	0.158674	2.32341e-18	654	76	45.0125	30.9875	0.151577	2.08882:2.35715:1.44557:1.73496:0.230389:1
rps4	BC-CE	MA	0.0379069	0.239194	0.158478	2.35641e-10	603	42	26.2271	15.7729	0.0798868	1.40149:1.3637:1.02491:1.09921:0.3292:1
rps4	BG-CE	MA	0.0379069	0.239194	0.158478	2.35641e-10	603	42	26.2271	15.7729	0.0798868	1.40149:1.3637:1.02491:1.09921:0.3292:1
rps4	BH-CE	MA	0.0379069	0.239194	0.158478	2.35641e-10	603	42	26.2271	15.7729	0.0798868	1.40149:1.3637:1.02491:1.09921:0.3292:1
rps4	BP-CE	MA	0.0379069	0.239194	0.158478	2.35641e-10	603	42	26.2271	15.7729	0.0798868	1.40149:1.3637:1.02491:1.09921:0.3292:1
rps4	BS-CE	MA	0.0379069	0.239194	0.158478	2.35641e-10	603	42	26.2271	15.7729	0.0798868	1.40149:1.3637:1.02491:1.09921:0.3292:1
psbJ	BP-EN	MA	0.0212625	0.134323	0.158293	0.00635512	120	5	3.11897	1.88103	0.0447681	0.290344:1.52937:0.198323:0.458155:0.01:1
rpl14	BG-VR	MA	0.0655985	0.417008	0.157308	1.27514e-10	366	43	28.8009	14.1991	0.150602	2.47214:2.46387:1.58088:1.61362:0.108874:1
rpl14	BS-VR	MA	0.0655985	0.417008	0.157308	1.27514e-10	366	43	28.8009	14.1991	0.150602	2.47214:2.46387:1.58088:1.61362:0.108874:1
ndhA	BC-EN	MA	0.0430642	0.274552	0.156853	6.36298e-17	1062	76	45.551	30.449	0.0870589	0.836748:2.40291:0.138765:0.168586:1.06145:1
ndhA	BH-EN	MA	0.0430642	0.274552	0.156853	6.36298e-17	1062	76	45.551	30.449	0.0870589	0.836748:2.40291:0.138765:0.168586:1.06145:1
rpl23	BP-CE	MA	0.0451597	0.28835	0.156614	3.3681e-08	405	32	21.521	10.479	0.104344	2.68858:2.80476:1.88461:2.06352:0.074087:1
rpl16	BP-CE	MA	0.0451597	0.28835	0.156614	3.3681e-08	405	32	21.521	10.479	0.104344	2.68858:2.80476:1.88461:2.06352:0.074087:1
psaI	BC-AC	MA	0.0384082	0.245635	0.156363	0.0087126	105	7	4.70043	2.29957	0.0885991	12.2659:6.87658:3.69828:3.69828:2.3515:1
psaI	BG-AC	MA	0.0384082	0.245635	0.156363	0.0087126	105	7	4.70043	2.29957	0.0885991	12.2659:6.87658:3.69828:3.69828:2.3515:1
psaI	BH-AC	MA	0.0384082	0.245635	0.156363	0.0087126	105	7	4.70043	2.29957	0.0885991	12.2659:6.87658:3.69828:3.69828:2.3515:1
psaI	BP-AC	MA	0.0384082	0.245635	0.156363	0.0087126	105	7	4.70043	2.29957	0.0885991	12.2659:6.87658:3.69828:3.69828:2.3515:1
psaI	BS-AC	MA	0.0384082	0.245635	0.156363	0.0087126	105	7	4.70043	2.29957	0.0885991	12.2659:6.87658:3.69828:3.69828:2.3515:1
rps18	BP-AC	MA	0.0525388	0.336095	0.156321	5.24921e-07	294	27	16.8907	10.1093	0.111262	3.00567:3.06369:1.82813:1.82509:0.341307:1
ndhD	BG-EN	MA	0.0463944	0.297837	0.155771	4.0538e-24	1434	111	69.7208	41.2792	0.0987688	1.06042:2.24454:0.141599:1.45275:1.27768:1
rps2	BP-VR	MA	0.0484071	0.311671	0.155315	4.65129e-15	708	62	39.0776	22.9224	0.103521	2.30313:2.15158:1.51542:1.60156:0.337961:1
rpl14	BP-VR	MA	0.0645057	0.418645	0.154082	1.18462e-10	366	43	28.9671	14.0329	0.149963	2.24113:2.18993:1.44699:1.55665:0.109604:1
rps3	BP-VR	MA	0.0717028	0.467373	0.153417	1.94341e-17	654	73	43.7736	29.2264	0.145632	2.181:2.37248:1.56763:1.87624:0.170767:1
ndhD	BP-EN	MA	0.0458933	0.299516	0.153225	3.19305e-25	1434	112	71.1929	40.8071	0.0993908	1.04087:1.85057:0.24207:1.32763:1.11453:1
ndhA	BG-EN	MA	0.0417674	0.272883	0.15306	6.06587e-17	1062	74	44.4694	29.5306	0.0850588	0.730573:2.43133:0.129584:0.160652:1.09352:1
ndhA	BS-EN	MA	0.0417674	0.272883	0.15306	6.06587e-17	1062	74	44.4694	29.5306	0.0850588	0.730573:2.43133:0.129584:0.160652:1.09352:1
rps2	BC-AC	MA	0.0501876	0.328016	0.153003	1.15582e-14	708	63	38.967	24.033	0.105411	0.886366:0.919794:0.674085:0.83043:0.171821:1
rps2	BG-AC	MA	0.0501876	0.328016	0.153003	1.15582e-14	708	63	38.967	24.033	0.105411	0.886366:0.919794:0.674085:0.83043:0.171821:1
rps2	BH-AC	MA	0.0501876	0.328016	0.153003	1.15582e-14	708	63	38.967	24.033	0.105411	0.886366:0.919794:0.674085:0.83043:0.171821:1
rps2	BS-AC	MA	0.0501876	0.328016	0.153003	1.15582e-14	708	63	38.967	24.033	0.105411	0.886366:0.919794:0.674085:0.83043:0.171821:1
atpE	BG-AC	MA	0.0402267	0.262998	0.152954	1.07134e-08	396	32	21.2188	10.7812	0.0917717	1.25047:1.3121:0.946365:0.946365:0.459138:1
atpE	BS-AC	MA	0.0402267	0.262998	0.152954	1.07134e-08	396	32	21.2188	10.7812	0.0917717	1.25047:1.3121:0.946365:0.946365:0.459138:1
rps14	BC-AC	MA	0.0448561	0.294072	0.152535	4.82803e-07	300	26	17.6571	8.34294	0.105675	6.60335:2.28202:0.614212:0.702015:0.269801:1
rps14	BG-AC	MA	0.0448561	0.294072	0.152535	4.82803e-07	300	26	17.6571	8.34294	0.105675	6.60335:2.28202:0.614212:0.702015:0.269801:1
rps14	BH-AC	MA	0.0448561	0.294072	0.152535	4.82803e-07	300	26	17.6571	8.34294	0.105675	6.60335:2.28202:0.614212:0.702015:0.269801:1
rps14	BS-AC	MA	0.0448561	0.294072	0.152535	4.82803e-07	300	26	17.6571	8.34294	0.105675	6.60335:2.28202:0.614212:0.702015:0.269801:1
cemA	BP-CE	MA	0.0492444	0.323537	0.152206	7.02649e-08	396	30	16.5288	13.4712	0.0924082	1.00299:3.70971:0.240698:1.27799:1.2618:1
ndhB	BC-EN	MA	0.002782	0.0182864	0.152135	0.00299612	1530	12	9.29322	2.70678	0.00810173	2.87442:0.198133:0.164279:0.164279:0.01:1
ndhB	BH-EN	MA	0.002782	0.0182864	0.152135	0.00299612	1530	12	9.29322	2.70678	0.00810173	2.87442:0.198133:0.164279:0.164279:0.01:1
rpl14	BP-EN	MA	0.0429205	0.282941	0.151694	3.17107e-08	366	30	19.3733	10.6267	0.0949184	1.21669:2.10087:0.68354:0.726123:0.168804:1
psbH	BC-VR	MA	0.0578297	0.382931	0.151018	1.26413e-06	219	23	14.6896	8.3104	0.126328	2.26692:2.26685:1.59171:2.09433:0.0933316:1
psbH	BG-VR	MA	0.0578297	0.382931	0.151018	1.26413e-06	219	23	14.6896	8.3104	0.126328	2.26692:2.26685:1.59171:2.09433:0.0933316:1
psbH	BH-VR	MA	0.0578297	0.382931	0.151018	1.26413e-06	219	23	14.6896	8.3104	0.126328	2.26692:2.26685:1.59171:2.09433:0.0933316:1
psbH	BP-VR	MA	0.0578297	0.382931	0.151018	1.26413e-06	219	23	14.6896	8.3104	0.126328	2.26692:2.26685:1.59171:2.09433:0.0933316:1
psbH	BS-VR	MA	0.0578297	0.382931	0.151018	1.26413e-06	219	23	14.6896	8.3104	0.126328	2.26692:2.26685:1.59171:2.09433:0.0933316:1
ndhD	BS-EN	MA	0.0464903	0.310381	0.149785	2.88238e-25	1434	113	71.9917	41.0083	0.101434	0.967166:2.16852:0.108158:1.35397:1.2116:1
rpl36	BC-AC	MA	0.0364404	0.244953	0.148765	0.00197859	111	8	5.38028	2.61972	0.0852377	2.1701:2.31028:1.32428:1.31666:0.214463:1
rpl36	BG-AC	MA	0.0364404	0.244953	0.148765	0.00197859	111	8	5.38028	2.61972	0.0852377	2.1701:2.31028:1.32428:1.31666:0.214463:1
rpl36	BH-AC	MA	0.0364404	0.244953	0.148765	0.00197859	111	8	5.38028	2.61972	0.0852377	2.1701:2.31028:1.32428:1.31666:0.214463:1
rpl36	BS-AC	MA	0.0364404	0.244953	0.148765	0.00197859	111	8	5.38028	2.61972	0.0852377	2.1701:2.31028:1.32428:1.31666:0.214463:1
cemA	BC-EN	MA	0.0381176	0.256684	0.1485	4.25168e-05	396	20	8.76519	11.2348	0.0608109	0.323585:5.06676:0.147877:1.5775:5.76096:1
cemA	BG-EN	MA	0.0381176	0.256684	0.1485	4.25168e-05	396	20	8.76519	11.2348	0.0608109	0.323585:5.06676:0.147877:1.5775:5.76096:1
cemA	BH-EN	MA	0.0381176	0.256684	0.1485	4.25168e-05	396	20	8.76519	11.2348	0.0608109	0.323585:5.06676:0.147877:1.5775:5.76096:1
cemA	BS-EN	MA	0.0381176	0.256684	0.1485	4.25168e-05	396	20	8.76519	11.2348	0.0608109	0.323585:5.06676:0.147877:1.5775:5.76096:1
clpP	BP-CE	MA	0.0260732	0.176362	0.147839	5.87802e-08	585	31	21.6599	9.34014	0.0644434	5.53735:6.50235:3.71152:4.67023:0.383073:1
ndhD	BC-EN	MA	0.0464906	0.31669	0.146802	1.32925e-26	1434	113	72.104	40.896	0.102046	1.00001:2.40978:0.0956534:1.47279:1.39251:1
ndhD	BH-EN	MA	0.0464906	0.31669	0.146802	1.32925e-26	1434	113	72.104	40.896	0.102046	1.00001:2.40978:0.0956534:1.47279:1.39251:1
ndhK	BC-CE	MA	0.0201308	0.138838	0.144995	2.06183e-07	663	28	18.7016	9.29841	0.0469326	2.73583:2.99994:1.91904:1.91904:0.210401:1
ndhK	BG-CE	MA	0.0201308	0.138838	0.144995	2.06183e-07	663	28	18.7016	9.29841	0.0469326	2.73583:2.99994:1.91904:1.91904:0.210401:1
ndhK	BH-CE	MA	0.0201308	0.138838	0.144995	2.06183e-07	663	28	18.7016	9.29841	0.0469326	2.73583:2.99994:1.91904:1.91904:0.210401:1
ndhK	BS-CE	MA	0.0201308	0.138838	0.144995	2.06183e-07	663	28	18.7016	9.29841	0.0469326	2.73583:2.99994:1.91904:1.91904:0.210401:1
rpoC1	BP-CE	MA	0.0335185	0.231337	0.144891	2.37082e-29	2016	127	79.0533	47.9467	0.0716633	1.93213:1.96186:1.43774:1.58038:0.2376:1
rps2	BP-AC	MA	0.0448672	0.3097	0.144873	5.94272e-15	708	59	37.4231	21.5769	0.0980485	0.864389:0.865232:0.658602:0.759868:0.147063:1
ndhA	BP-EN	MA	0.0429116	0.29622	0.144864	3.07228e-19	1062	78	48.0305	29.9695	0.0906401	0.628392:2.22223:0.108992:0.134889:1.03902:1
petL	BP-AC	MA	0.0387253	0.270476	0.143175	0.010714	93	7	4.93011	2.06989	0.0976588	11.6383:26.3002:14.0938:14.065:1.58953:1
rps14	BP-VR	MA	0.0373199	0.26143	0.142753	8.94377e-07	300	22	14.3568	7.64316	0.0847073	4.69119:3.2312:2.77736:4.50686:1.4469:1
rps14	BP-AC	MA	0.0450883	0.316851	0.142301	1.22896e-07	300	27	18.6965	8.30351	0.111034	6.37056:2.59603:0.784922:0.870547:0.268183:1
ndhG	BP-EN	MA	0.040859	0.288376	0.141687	9.13602e-11	525	39	25.2483	13.7517	0.0919554	0.76109:1.3332:0.420306:0.492375:0.43372:1
psbJ	BC-VR	MA	0.0218717	0.1548	0.141291	0.00289549	120	6	4.14454	1.85546	0.0537598	1.67143:2.50869:1.80201:1.85443:0.203614:1
psbJ	BG-VR	MA	0.0218717	0.1548	0.141291	0.00289549	120	6	4.14454	1.85546	0.0537598	1.67143:2.50869:1.80201:1.85443:0.203614:1
psbJ	BH-VR	MA	0.0218717	0.1548	0.141291	0.00289549	120	6	4.14454	1.85546	0.0537598	1.67143:2.50869:1.80201:1.85443:0.203614:1
psbJ	BS-VR	MA	0.0218717	0.1548	0.141291	0.00289549	120	6	4.14454	1.85546	0.0537598	1.67143:2.50869:1.80201:1.85443:0.203614:1
rps4	BC-VR	MA	0.0491305	0.349073	0.140746	4.70681e-15	603	57	37.4464	19.5536	0.112812	1.43462:1.4738:1.08831:1.18461:0.345027:1
rps4	BG-VR	MA	0.0491305	0.349073	0.140746	4.70681e-15	603	57	37.4464	19.5536	0.112812	1.43462:1.4738:1.08831:1.18461:0.345027:1
rps4	BH-VR	MA	0.0491305	0.349073	0.140746	4.70681e-15	603	57	37.4464	19.5536	0.112812	1.43462:1.4738:1.08831:1.18461:0.345027:1
rps4	BP-VR	MA	0.0491305	0.349073	0.140746	4.70681e-15	603	57	37.4464	19.5536	0.112812	1.43462:1.4738:1.08831:1.18461:0.345027:1
rps4	BS-VR	MA	0.0491305	0.349073	0.140746	4.70681e-15	603	57	37.4464	19.5536	0.112812	1.43462:1.4738:1.08831:1.18461:0.345027:1
ndhG	BC-VR	MA	0.0607521	0.434971	0.139669	2.77007e-14	525	55	36.9904	18.0096	0.144173	3.2063:3.33655:2.38754:3.28678:0.238257:1
ndhG	BH-VR	MA	0.0607521	0.434971	0.139669	2.77007e-14	525	55	36.9904	18.0096	0.144173	3.2063:3.33655:2.38754:3.28678:0.238257:1
atpE	BC-AC	MA	0.0432986	0.310973	0.139236	2.01231e-09	396	35	23.9267	11.0733	0.105205	1.1246:1.24454:0.834576:0.837031:0.44143:1
atpE	BH-AC	MA	0.0432986	0.310973	0.139236	2.01231e-09	396	35	23.9267	11.0733	0.105205	1.1246:1.24454:0.834576:0.837031:0.44143:1
ndhB	BC-CE	MA	0.00537588	0.0387299	0.138805	3.98498e-06	1530	20	14.2047	5.79533	0.0138429	1.41024:0.987677:0.698892:0.698892:0.86921:1
ndhB	BH-CE	MA	0.00537588	0.0387299	0.138805	3.98498e-06	1530	20	14.2047	5.79533	0.0138429	1.41024:0.987677:0.698892:0.698892:0.86921:1
cemA	BC-CE	MA	0.0452525	0.327637	0.138118	3.69186e-08	396	29	16.7041	12.2959	0.0898667	1.06646:4.25382:0.233975:1.34709:0.94513:1
cemA	BG-CE	MA	0.0452525	0.327637	0.138118	3.69186e-08	396	29	16.7041	12.2959	0.0898667	1.06646:4.25382:0.233975:1.34709:0.94513:1
cemA	BH-CE	MA	0.0452525	0.327637	0.138118	3.69186e-08	396	29	16.7041	12.2959	0.0898667	1.06646:4.25382:0.233975:1.34709:0.94513:1
cemA	BS-CE	MA	0.0452525	0.327637	0.138118	3.69186e-08	396	29	16.7041	12.2959	0.0898667	1.06646:4.25382:0.233975:1.34709:0.94513:1
atpE	BP-AC	MA	0.0372463	0.272617	0.136625	1.47102e-09	396	32	22.1271	9.87289	0.0924225	1.36633:1.44595:1.0338:1.0338:0.678387:1
ndhC	BC-AC	MA	0.0191403	0.141777	0.135002	0.00015939	360	15	10.95	4.05	0.0519337	2.99854:4.50794:1.54147:1.54147:0.564654:1
ndhC	BG-AC	MA	0.0191403	0.141777	0.135002	0.00015939	360	15	10.95	4.05	0.0519337	2.99854:4.50794:1.54147:1.54147:0.564654:1
ndhC	BH-AC	MA	0.0191403	0.141777	0.135002	0.00015939	360	15	10.95	4.05	0.0519337	2.99854:4.50794:1.54147:1.54147:0.564654:1
ndhC	BS-AC	MA	0.0191403	0.141777	0.135002	0.00015939	360	15	10.95	4.05	0.0519337	2.99854:4.50794:1.54147:1.54147:0.564654:1
clpP	BP-EN	MA	0.0178498	0.132271	0.134948	6.78185e-07	585	23	16.3828	6.61718	0.0465047	1.75704:2.40893:0.983256:1.29975:0.146758:1
rps14	BC-VR	MA	0.0375835	0.278599	0.134902	2.7522e-07	300	23	15.3858	7.61415	0.0892099	4.63096:3.53384:3.14539:4.63442:1.27017:1
rps14	BG-VR	MA	0.0375835	0.278599	0.134902	2.7522e-07	300	23	15.3858	7.61415	0.0892099	4.63096:3.53384:3.14539:4.63442:1.27017:1
rps14	BH-VR	MA	0.0375835	0.278599	0.134902	2.7522e-07	300	23	15.3858	7.61415	0.0892099	4.63096:3.53384:3.14539:4.63442:1.27017:1
rps14	BS-VR	MA	0.0375835	0.278599	0.134902	2.7522e-07	300	23	15.3858	7.61415	0.0892099	4.63096:3.53384:3.14539:4.63442:1.27017:1
rpl2	BC-VR	MA	0.0131957	0.0981657	0.134423	1.62694e-07	822	25	17.227	7.77299	0.0326993	11.5678:22.254:4.94491:4.83893:0.221621:1
rpl2	BG-VR	MA	0.0131957	0.0981657	0.134423	1.62694e-07	822	25	17.227	7.77299	0.0326993	11.5678:22.254:4.94491:4.83893:0.221621:1
rpl2	BH-VR	MA	0.0131957	0.0981657	0.134423	1.62694e-07	822	25	17.227	7.77299	0.0326993	11.5678:22.254:4.94491:4.83893:0.221621:1
rpl2	BP-VR	MA	0.0131957	0.0981657	0.134423	1.62694e-07	822	25	17.227	7.77299	0.0326993	11.5678:22.254:4.94491:4.83893:0.221621:1
rpl2	BS-VR	MA	0.0131957	0.0981657	0.134423	1.62694e-07	822	25	17.227	7.77299	0.0326993	11.5678:22.254:4.94491:4.83893:0.221621:1
petL	BC-CE	MA	0.0756257	0.565822	0.133656	0.000112216	93	12	8.52438	3.47562	0.196645	6.44099:8.12088:2.58029:2.58029:0.276741:1
petL	BH-CE	MA	0.0756257	0.565822	0.133656	0.000112216	93	12	8.52438	3.47562	0.196645	6.44099:8.12088:2.58029:2.58029:0.276741:1
ndhK	BP-CE	MA	0.0182292	0.137711	0.132373	9.73823e-08	663	27	18.6407	8.35933	0.0454599	3.26448:3.58632:2.20118:2.20118:0.108361:1
rpoC1	BS-CE	MA	0.0330676	0.250909	0.131791	4.17249e-33	2016	131	84.0146	46.9854	0.0746129	1.69456:1.78659:1.20148:1.35844:0.27094:1
psbN	BC-AC	MA	0.0110879	0.0844846	0.131241	0.00333544	129	4	3.11739	0.882613	0.0343346	4.4828:1.86282:1.14915:1.14915:0.01:1
psbN	BG-AC	MA	0.0110879	0.0844846	0.131241	0.00333544	129	4	3.11739	0.882613	0.0343346	4.4828:1.86282:1.14915:1.14915:0.01:1
psbN	BH-AC	MA	0.0110879	0.0844846	0.131241	0.00333544	129	4	3.11739	0.882613	0.0343346	4.4828:1.86282:1.14915:1.14915:0.01:1
psbN	BP-AC	MA	0.0110879	0.0844846	0.131241	0.00333544	129	4	3.11739	0.882613	0.0343346	4.4828:1.86282:1.14915:1.14915:0.01:1
psbN	BS-AC	MA	0.0110879	0.0844846	0.131241	0.00333544	129	4	3.11739	0.882613	0.0343346	4.4828:1.86282:1.14915:1.14915:0.01:1
rpoB	BC-CE	MA	0.0321664	0.245842	0.130842	8.91465e-52	3207	213	142.748	70.252	0.0770436	1.89463:2.1905:1.01852:1.15789:0.476097:1
rpoB	BH-CE	MA	0.0321664	0.245842	0.130842	8.91465e-52	3207	213	142.748	70.252	0.0770436	1.89463:2.1905:1.01852:1.15789:0.476097:1
ndhA	BC-VR	MA	0.0549049	0.420891	0.130449	8.03808e-30	1062	111	77.1372	33.8628	0.138746	1.93204:3.14591:0.458273:0.767046:0.193268:1
ndhA	BH-VR	MA	0.0549049	0.420891	0.130449	8.03808e-30	1062	111	77.1372	33.8628	0.138746	1.93204:3.14591:0.458273:0.767046:0.193268:1
ndhA	BC-AC	MA	0.059027	0.452829	0.130352	1.64587e-30	1062	112	75.0885	36.9115	0.141565	2.81925:7.16809:0.293393:1.74661:0.788464:1
ndhA	BH-AC	MA	0.059027	0.452829	0.130352	1.64587e-30	1062	112	75.0885	36.9115	0.141565	2.81925:7.16809:0.293393:1.74661:0.788464:1
rpoC1	BP-EN	MA	0.0199707	0.153777	0.129868	2.30576e-21	2016	86	55.873	30.127	0.0459427	1.08845:1.04355:0.759253:0.829708:0.268868:1
rpoC1	BG-CE	MA	0.033084	0.255128	0.129676	8.37269e-34	2016	132	85.0625	46.9375	0.0753362	1.71915:1.79066:1.24172:1.38995:0.255818:1
ndhJ	BP-CE	MA	0.0352253	0.272268	0.129377	4.12771e-10	474	34	23.3907	10.6093	0.0878337	6.21352:6.24095:3.54812:3.56191:0.403734:1
rpoC1	BS-EN	MA	0.0208146	0.162812	0.127844	1.4705e-22	2016	89	57.7088	31.2912	0.0479066	0.9633:0.924645:0.688245:0.752924:0.288111:1
ndhC	BP-AC	MA	0.0194754	0.15253	0.127682	6.25359e-05	360	16	11.9211	4.07889	0.0556341	3.45655:4.58724:1.89351:1.89351:0.503756:1
rpoC1	BC-CE	MA	0.0331073	0.259703	0.127482	1.74608e-34	2016	133	86.1639	46.8361	0.0761543	1.74102:1.8297:1.239:1.39633:0.267224:1
rpoC1	BH-CE	MA	0.0331073	0.259703	0.127482	1.74608e-34	2016	133	86.1639	46.8361	0.0761543	1.74102:1.8297:1.239:1.39633:0.267224:1
rpoB	BG-CE	MA	0.0313627	0.246759	0.127098	6.89285e-53	3207	211	142.463	68.5369	0.0763762	1.99749:2.28632:1.09456:1.31525:0.52543:1
petA	BP-AC	MA	0.0443146	0.350409	0.126465	6.87704e-24	960	87	60.3509	26.6491	0.112462	2.00201:1.89271:1.38963:1.40799:0.309621:1
rpoB	BS-CE	MA	0.0308405	0.245067	0.125845	1.40944e-52	3207	209	141.69	67.3104	0.0757053	2.09671:2.39894:1.15042:1.38962:0.524232:1
rpoB	BP-CE	MA	0.0304951	0.242365	0.125823	2.65097e-52	3207	207	140.433	66.5667	0.0749377	2.00223:2.4233:0.922103:1.27157:0.587102:1
ndhG	BG-VR	MA	0.0546316	0.435201	0.125532	4.1469e-15	525	53	36.8722	16.1278	0.139498	2.99505:3.10571:2.24089:3.15672:0.235711:1
ndhG	BS-VR	MA	0.0546316	0.435201	0.125532	4.1469e-15	525	53	36.8722	16.1278	0.139498	2.99505:3.10571:2.24089:3.15672:0.235711:1
rpoC1	BG-EN	MA	0.0208243	0.16612	0.125357	3.77772e-23	2016	90	58.7573	31.2427	0.0485436	0.987009:0.931219:0.680431:0.749866:0.302896:1
ndhA	BP-VR	MA	0.0546009	0.436997	0.124946	5.52306e-31	1062	112	78.3956	33.6044	0.140907	1.67067:3.1053:0.237047:0.684931:0.267166:1
rpoC1	BC-EN	MA	0.021047	0.169011	0.124531	8.16292e-24	2016	91	59.4724	31.5276	0.0491933	1.13732:1.11526:0.837862:0.907181:0.309384:1
rpoC1	BH-EN	MA	0.021047	0.169011	0.124531	8.16292e-24	2016	91	59.4724	31.5276	0.0491933	1.13732:1.11526:0.837862:0.907181:0.309384:1
ndhA	BG-VR	MA	0.0535488	0.430856	0.124284	6.42592e-31	1062	111	78.2346	32.7654	0.139894	1.92545:3.24105:0.407836:0.733361:0.203256:1
ndhA	BS-VR	MA	0.0535488	0.430856	0.124284	6.42592e-31	1062	111	78.2346	32.7654	0.139894	1.92545:3.24105:0.407836:0.733361:0.203256:1
ndhA	BG-AC	MA	0.0576831	0.465062	0.124033	1.28936e-31	1062	112	76.2787	35.7213	0.142987	2.79897:7.30367:0.289316:1.79723:0.813725:1
ndhA	BS-AC	MA	0.0576831	0.465062	0.124033	1.28936e-31	1062	112	76.2787	35.7213	0.142987	2.79897:7.30367:0.289316:1.79723:0.813725:1
psbL	BC-VR	MA	0.0176999	0.1452	0.1219	0.0138241	114	5	3.67843	1.32157	0.0500006	30:27.4707:23.3277:23.3277:0.01:1
psbL	BG-VR	MA	0.0176999	0.1452	0.1219	0.0138241	114	5	3.67843	1.32157	0.0500006	30:27.4707:23.3277:23.3277:0.01:1
psbL	BH-VR	MA	0.0176999	0.1452	0.1219	0.0138241	114	5	3.67843	1.32157	0.0500006	30:27.4707:23.3277:23.3277:0.01:1
psbL	BP-VR	MA	0.0176999	0.1452	0.1219	0.0138241	114	5	3.67843	1.32157	0.0500006	30:27.4707:23.3277:23.3277:0.01:1
psbL	BS-VR	MA	0.0176999	0.1452	0.1219	0.0138241	114	5	3.67843	1.32157	0.0500006	30:27.4707:23.3277:23.3277:0.01:1
rps11	BC-VR	MA	0.0421308	0.347449	0.121258	3.43823e-11	414	38	27.8497	10.1503	0.118351	4.2954:3.17754:1.58252:1.73893:0.30002:1
rps11	BG-VR	MA	0.0421308	0.347449	0.121258	3.43823e-11	414	38	27.8497	10.1503	0.118351	4.2954:3.17754:1.58252:1.73893:0.30002:1
rps11	BH-VR	MA	0.0421308	0.347449	0.121258	3.43823e-11	414	38	27.8497	10.1503	0.118351	4.2954:3.17754:1.58252:1.73893:0.30002:1
rps11	BS-VR	MA	0.0421308	0.347449	0.121258	3.43823e-11	414	38	27.8497	10.1503	0.118351	4.2954:3.17754:1.58252:1.73893:0.30002:1
ndhE	BC-AC	MA	0.0444307	0.368803	0.120473	1.4051e-08	300	26	18.4958	7.50419	0.118696	25.6696:25.5576:19.9721:21.6193:0.717313:1
ndhE	BG-AC	MA	0.0444307	0.368803	0.120473	1.4051e-08	300	26	18.4958	7.50419	0.118696	25.6696:25.5576:19.9721:21.6193:0.717313:1
ndhE	BH-AC	MA	0.0444307	0.368803	0.120473	1.4051e-08	300	26	18.4958	7.50419	0.118696	25.6696:25.5576:19.9721:21.6193:0.717313:1
ndhE	BP-AC	MA	0.0444307	0.368803	0.120473	1.4051e-08	300	26	18.4958	7.50419	0.118696	25.6696:25.5576:19.9721:21.6193:0.717313:1
ndhE	BS-AC	MA	0.0444307	0.368803	0.120473	1.4051e-08	300	26	18.4958	7.50419	0.118696	25.6696:25.5576:19.9721:21.6193:0.717313:1
ndhJ	BC-CE	MA	0.0347126	0.288557	0.120297	1.00005e-10	474	35	24.5961	10.4039	0.0909197	4.73515:4.77339:2.71244:2.7227:0.26031:1
ndhJ	BG-CE	MA	0.0347126	0.288557	0.120297	1.00005e-10	474	35	24.5961	10.4039	0.0909197	4.73515:4.77339:2.71244:2.7227:0.26031:1
ndhJ	BH-CE	MA	0.0347126	0.288557	0.120297	1.00005e-10	474	35	24.5961	10.4039	0.0909197	4.73515:4.77339:2.71244:2.7227:0.26031:1
ndhJ	BS-CE	MA	0.0347126	0.288557	0.120297	1.00005e-10	474	35	24.5961	10.4039	0.0909197	4.73515:4.77339:2.71244:2.7227:0.26031:1
ndhK	BC-EN	MA	0.0191175	0.159499	0.11986	2.64955e-08	663	27	17.7356	9.26437	0.0453174	0.587239:2.09837:0.119872:0.119872:2.25901:1
ndhK	BG-EN	MA	0.0191175	0.159499	0.11986	2.64955e-08	663	27	17.7356	9.26437	0.0453174	0.587239:2.09837:0.119872:0.119872:2.25901:1
ndhK	BH-EN	MA	0.0191175	0.159499	0.11986	2.64955e-08	663	27	17.7356	9.26437	0.0453174	0.587239:2.09837:0.119872:0.119872:2.25901:1
ndhK	BS-EN	MA	0.0191175	0.159499	0.11986	2.64955e-08	663	27	17.7356	9.26437	0.0453174	0.587239:2.09837:0.119872:0.119872:2.25901:1
rps2	BC-EN	MA	0.023945	0.20016	0.119629	1.19619e-10	708	36	23.7938	12.2062	0.0572673	0.719832:0.589264:0.469905:0.682391:0.752508:1
rps2	BG-EN	MA	0.023945	0.20016	0.119629	1.19619e-10	708	36	23.7938	12.2062	0.0572673	0.719832:0.589264:0.469905:0.682391:0.752508:1
rps2	BH-EN	MA	0.023945	0.20016	0.119629	1.19619e-10	708	36	23.7938	12.2062	0.0572673	0.719832:0.589264:0.469905:0.682391:0.752508:1
rps2	BS-EN	MA	0.023945	0.20016	0.119629	1.19619e-10	708	36	23.7938	12.2062	0.0572673	0.719832:0.589264:0.469905:0.682391:0.752508:1
rps11	BP-VR	MA	0.042995	0.360785	0.119171	1.15211e-11	414	39	28.7877	10.2123	0.122907	5.97585:4.17168:1.86446:1.97152:0.445649:1
ndhB	BG-CE	MA	0.00448865	0.03783	0.118653	1.81123e-06	1530	19	14.2036	4.79637	0.0131578	1.55362:1.12071:0.793431:0.793431:0.645647:1
ndhB	BP-CE	MA	0.00448865	0.03783	0.118653	1.81123e-06	1530	19	14.2036	4.79637	0.0131578	1.55362:1.12071:0.793431:0.793431:0.645647:1
ndhB	BS-CE	MA	0.00448865	0.03783	0.118653	1.81123e-06	1530	19	14.2036	4.79637	0.0131578	1.55362:1.12071:0.793431:0.793431:0.645647:1
clpP	BG-CE	MA	0.0213152	0.179685	0.118625	4.13246e-09	585	30	22.5003	7.49973	0.0628839	4.71873:4.97298:2.7375:2.93145:0.194074:1
clpP	BS-CE	MA	0.0213152	0.179685	0.118625	4.13246e-09	585	30	22.5003	7.49973	0.0628839	4.71873:4.97298:2.7375:2.93145:0.194074:1
ndhA	BP-AC	MA	0.0556413	0.470732	0.118202	1.07586e-32	1062	111	76.2278	34.7722	0.141065	2.29747:6.13058:0.254892:2.0508:0.866204:1
rpl23	BC-EN	MA	0.0362624	0.307219	0.118034	6.64622e-10	405	32	23.6275	8.37246	0.103966	2.87953:2.97132:1.89363:1.90441:0.292302:1
rpl23	BH-EN	MA	0.0362624	0.307219	0.118034	6.64622e-10	405	32	23.6275	8.37246	0.103966	2.87953:2.97132:1.89363:1.90441:0.292302:1
rpl16	BC-EN	MA	0.0362624	0.307219	0.118034	6.64622e-10	405	32	23.6275	8.37246	0.103966	2.87953:2.97132:1.89363:1.90441:0.292302:1
rpl16	BH-EN	MA	0.0362624	0.307219	0.118034	6.64622e-10	405	32	23.6275	8.37246	0.103966	2.87953:2.97132:1.89363:1.90441:0.292302:1
rpoC1	BP-VR	MA	0.0337023	0.286546	0.117616	2.53213e-39	2016	144	97.8293	46.1707	0.0841434	2.91349:2.55314:1.49647:1.8647:0.891271:1
ndhG	BP-VR	MA	0.051199	0.442681	0.115656	9.20219e-16	525	52	36.897	15.103	0.137444	2.11627:2.30724:1.5198:2.36285:0.109298:1
petA	BC-AC	MA	0.042496	0.368675	0.115267	1.09437e-25	960	88	62.6448	25.3552	0.114797	1.87671:1.7725:1.30432:1.32479:0.337262:1
petA	BH-AC	MA	0.042496	0.368675	0.115267	1.09437e-25	960	88	62.6448	25.3552	0.114797	1.87671:1.7725:1.30432:1.32479:0.337262:1
rpoC1	BP-AC	MA	0.0347605	0.301778	0.115186	4.68799e-42	2016	149	101.335	47.6653	0.0872857	2.30488:2.12169:1.4375:1.59793:0.688596:1
petA	BS-AC	MA	0.04176	0.364111	0.11469	3.18625e-25	960	86	61.5505	24.4495	0.11398	1.90776:1.91514:1.43612:1.45693:0.267664:1
petA	BS-EN	MA	0.026429	0.234409	0.112747	1.27242e-17	960	58	41.2001	16.7999	0.0714794	1.21657:1.32494:0.905849:0.937345:0.44859:1
petA	BG-AC	MA	0.0416733	0.371658	0.112128	6.72791e-26	960	87	62.6193	24.3807	0.115457	1.7766:1.79144:1.34257:1.36321:0.244472:1
rps4	BC-AC	MA	0.0444752	0.39744	0.111904	2.22937e-17	603	56	38.8609	17.1391	0.115908	2.11316:2.00952:1.49295:2.04444:0.370802:1
rps4	BG-AC	MA	0.0444752	0.39744	0.111904	2.22937e-17	603	56	38.8609	17.1391	0.115908	2.11316:2.00952:1.49295:2.04444:0.370802:1
rps4	BH-AC	MA	0.0444752	0.39744	0.111904	2.22937e-17	603	56	38.8609	17.1391	0.115908	2.11316:2.00952:1.49295:2.04444:0.370802:1
rps4	BP-AC	MA	0.0444752	0.39744	0.111904	2.22937e-17	603	56	38.8609	17.1391	0.115908	2.11316:2.00952:1.49295:2.04444:0.370802:1
rps4	BS-AC	MA	0.0444752	0.39744	0.111904	2.22937e-17	603	56	38.8609	17.1391	0.115908	2.11316:2.00952:1.49295:2.04444:0.370802:1
rpoC1	BS-VR	MA	0.0335763	0.302655	0.110939	3.92124e-42	2016	147	100.918	46.0816	0.086172	2.23045:2.06592:1.36943:1.6131:0.558125:1
clpP	BC-CE	MA	0.0210411	0.190257	0.110593	1.2601e-09	585	31	23.6532	7.3468	0.0654717	3.53478:3.75642:2.00787:2.18415:0.138577:1
clpP	BH-CE	MA	0.0210411	0.190257	0.110593	1.2601e-09	585	31	23.6532	7.3468	0.0654717	3.53478:3.75642:2.00787:2.18415:0.138577:1
rpl23	BP-EN	MA	0.0294485	0.267891	0.109927	9.79833e-10	405	28	21.0953	6.90472	0.089396	3.30933:2.93194:1.75676:1.77233:0.226908:1
rpl16	BP-EN	MA	0.0294485	0.267891	0.109927	9.79833e-10	405	28	21.0953	6.90472	0.089396	3.30933:2.93194:1.75676:1.77233:0.226908:1
rps2	BP-EN	MA	0.0220322	0.201082	0.109568	6.4469e-11	708	34	22.6812	11.3188	0.0542667	0.750264:0.439103:0.345998:0.95786:0.963041:1
rpoC1	BG-VR	MA	0.0335548	0.306248	0.109567	8.41675e-44	2016	148	102.05	45.9503	0.0869239	2.26525:2.06708:1.32287:1.58374:0.597054:1
rps12	BC-AC	MA	0.0108144	0.0991796	0.109038	4.21444e-05	369	11	8.02936	2.97064	0.0309292	5.14886:5.44087:4.45805:5.76815:0.01:1
rps12	BH-AC	MA	0.0108144	0.0991796	0.109038	4.21444e-05	369	11	8.02936	2.97064	0.0309292	5.14886:5.44087:4.45805:5.76815:0.01:1
petA	BG-EN	MA	0.02636	0.241931	0.108957	2.75902e-18	960	59	42.2704	16.7296	0.0728954	1.11641:1.22467:0.828362:0.856383:0.40204:1
ndhK	BP-EN	MA	0.0171819	0.158119	0.108665	1.228e-08	663	26	17.7072	8.29275	0.0437245	0.598724:2.1647:0.119417:0.119417:1.9313:1
ndhH	BP-CE	MA	0.0309801	0.286221	0.108238	2.57947e-24	1179	80	57.3129	22.6871	0.0857859	2.51929:3.12187:1.50007:2.06364:0.808902:1
ndhI	BC-AC	MA	0.0282226	0.261635	0.10787	3.05142e-10	495	29	19.2692	9.73076	0.0693057	3.80133:4.2892:3.835:4.0083:3.95268:1
ndhI	BH-AC	MA	0.0282226	0.261635	0.10787	3.05142e-10	495	29	19.2692	9.73076	0.0693057	3.80133:4.2892:3.835:4.0083:3.95268:1
rpoC1	BC-VR	MA	0.0332744	0.309779	0.107413	4.59073e-44	2016	148	102.457	45.5425	0.0870875	2.43315:2.2195:1.41958:1.76107:0.63909:1
rpoC1	BH-VR	MA	0.0332744	0.309779	0.107413	4.59073e-44	2016	148	102.457	45.5425	0.0870875	2.43315:2.2195:1.41958:1.76107:0.63909:1
rpl23	BC-AC	MA	0.0404981	0.377688	0.107226	4.46722e-11	405	34	24.9035	9.09647	0.117019	4.43006:4.63842:3.3282:4.1175:0.352647:1
rpl23	BH-AC	MA	0.0404981	0.377688	0.107226	4.46722e-11	405	34	24.9035	9.09647	0.117019	4.43006:4.63842:3.3282:4.1175:0.352647:1
rpl16	BC-AC	MA	0.0404981	0.377688	0.107226	4.46722e-11	405	34	24.9035	9.09647	0.117019	4.43006:4.63842:3.3282:4.1175:0.352647:1
rpl16	BH-AC	MA	0.0404981	0.377688	0.107226	4.46722e-11	405	34	24.9035	9.09647	0.117019	4.43006:4.63842:3.3282:4.1175:0.352647:1
ndhI	BP-AC	MA	0.0282348	0.263894	0.106993	2.46834e-10	495	29	19.242	9.75801	0.0692921	3.92482:5.72405:3.1489:3.64387:4.72967:1
ycf4	BG-AC	MA	0.0388243	0.364978	0.106374	4.33453e-16	552	50	37.4973	12.5027	0.11771	2.20566:1.97345:1.32603:1.33809:0.518917:1
ycf4	BS-AC	MA	0.0388243	0.364978	0.106374	4.33453e-16	552	50	37.4973	12.5027	0.11771	2.20566:1.97345:1.32603:1.33809:0.518917:1
petA	BP-EN	MA	0.0249473	0.23467	0.106308	4.08107e-18	960	57	41.1549	15.8451	0.0703256	1.18217:1.26244:0.894908:0.924879:0.419466:1
ndhE	BC-CE	MA	0.0283071	0.267657	0.105759	3.2582e-07	300	19	13.4835	5.51645	0.0774704	11.2009:10.6599:12.8033:14.4607:4.27542:1
ndhE	BG-CE	MA	0.0283071	0.267657	0.105759	3.2582e-07	300	19	13.4835	5.51645	0.0774704	11.2009:10.6599:12.8033:14.4607:4.27542:1
ndhE	BH-CE	MA	0.0283071	0.267657	0.105759	3.2582e-07	300	19	13.4835	5.51645	0.0774704	11.2009:10.6599:12.8033:14.4607:4.27542:1
ndhE	BP-CE	MA	0.0283071	0.267657	0.105759	3.2582e-07	300	19	13.4835	5.51645	0.0774704	11.2009:10.6599:12.8033:14.4607:4.27542:1
ndhE	BS-CE	MA	0.0283071	0.267657	0.105759	3.2582e-07	300	19	13.4835	5.51645	0.0774704	11.2009:10.6599:12.8033:14.4607:4.27542:1
ndhC	BC-CE	MA	0.0200829	0.191253	0.105007	1.30418e-06	360	16	12.026	3.97403	0.0613588	1.12928:5.12925:0.313969:0.291201:1.94245:1
ndhC	BG-CE	MA	0.0200829	0.191253	0.105007	1.30418e-06	360	16	12.026	3.97403	0.0613588	1.12928:5.12925:0.313969:0.291201:1.94245:1
ndhC	BH-CE	MA	0.0200829	0.191253	0.105007	1.30418e-06	360	16	12.026	3.97403	0.0613588	1.12928:5.12925:0.313969:0.291201:1.94245:1
ndhC	BS-CE	MA	0.0200829	0.191253	0.105007	1.30418e-06	360	16	12.026	3.97403	0.0613588	1.12928:5.12925:0.313969:0.291201:1.94245:1
petL	BC-VR	MA	0.0582223	0.55942	0.104076	5.15722e-05	93	11	8.46186	2.53814	0.187329	11.5856:13.1845:4.28521:4.28394:0.084518:1
petL	BH-VR	MA	0.0582223	0.55942	0.104076	5.15722e-05	93	11	8.46186	2.53814	0.187329	11.5856:13.1845:4.28521:4.28394:0.084518:1
ndhH	BG-CE	MA	0.0323622	0.311343	0.103944	3.1966e-26	1179	84	60.4488	23.5512	0.0911169	1.82397:2.54347:0.938199:1.23606:1.0767:1
rpl2	BC-AC	MA	0.00861348	0.083204	0.103522	1.03386e-06	822	20	14.9172	5.08275	0.025995	6.16504:6.01445:4.50018:4.56343:0.90412:1
rpl2	BG-AC	MA	0.00861348	0.083204	0.103522	1.03386e-06	822	20	14.9172	5.08275	0.025995	6.16504:6.01445:4.50018:4.56343:0.90412:1
rpl2	BH-AC	MA	0.00861348	0.083204	0.103522	1.03386e-06	822	20	14.9172	5.08275	0.025995	6.16504:6.01445:4.50018:4.56343:0.90412:1
rpl2	BP-AC	MA	0.00861348	0.083204	0.103522	1.03386e-06	822	20	14.9172	5.08275	0.025995	6.16504:6.01445:4.50018:4.56343:0.90412:1
rpl2	BS-AC	MA	0.00861348	0.083204	0.103522	1.03386e-06	822	20	14.9172	5.08275	0.025995	6.16504:6.01445:4.50018:4.56343:0.90412:1
rpoB	BG-AC	MA	0.0325751	0.315423	0.103274	1.10744e-72	3207	243	173.659	69.3413	0.090698	2.10622:2.07077:1.53007:1.69849:0.382854:1
rpoB	BC-AC	MA	0.0332997	0.323502	0.102935	5.6682e-75	3207	248	177.254	70.7463	0.0927985	1.9697:1.94951:1.44876:1.5821:0.364889:1
rpoB	BH-AC	MA	0.0332997	0.323502	0.102935	5.6682e-75	3207	248	177.254	70.7463	0.0927985	1.9697:1.94951:1.44876:1.5821:0.364889:1
rpoC1	BS-AC	MA	0.033486	0.325527	0.102867	5.34504e-47	2016	152	106.374	45.626	0.0899774	2.03144:1.97836:1.46546:1.58163:0.48897:1
ycf4	BC-AC	MA	0.0383287	0.373952	0.102496	1.8981e-16	552	51	38.7658	12.2342	0.120608	2.31741:2.09674:1.35323:1.35765:0.461715:1
ycf4	BH-AC	MA	0.0383287	0.373952	0.102496	1.8981e-16	552	51	38.7658	12.2342	0.120608	2.31741:2.09674:1.35323:1.35765:0.461715:1
atpE	BP-CE	MA	0.023519	0.229866	0.102316	1.90362e-08	399	25	18.8875	6.11252	0.0730855	18.7175:22.0371:13.6329:13.6329:10.104:1
rpoB	BS-AC	MA	0.0320667	0.313799	0.102189	2.16893e-72	3207	241	172.84	68.16	0.0900474	2.20044:2.16278:1.59766:1.77768:0.38695:1
ndhC	BP-CE	MA	0.0202439	0.198192	0.102143	6.51681e-06	360	17	12.9875	4.01255	0.0644575	1.57459:5.0352:0.505305:0.482635:1.86499:1
rpl23	BG-EN	MA	0.0292865	0.288182	0.101625	2.03359e-10	405	29	22.1919	6.80807	0.0937083	2.60467:2.51397:1.66153:1.67415:0.296271:1
rpl23	BS-EN	MA	0.0292865	0.288182	0.101625	2.03359e-10	405	29	22.1919	6.80807	0.0937083	2.60467:2.51397:1.66153:1.67415:0.296271:1
rpl16	BG-EN	MA	0.0292865	0.288182	0.101625	2.03359e-10	405	29	22.1919	6.80807	0.0937083	2.60467:2.51397:1.66153:1.67415:0.296271:1
rpl16	BS-EN	MA	0.0292865	0.288182	0.101625	2.03359e-10	405	29	22.1919	6.80807	0.0937083	2.60467:2.51397:1.66153:1.67415:0.296271:1
rpoC1	BG-AC	MA	0.0334826	0.329622	0.101579	1.15464e-47	2016	153	107.48	45.5202	0.0907695	2.05428:1.98311:1.45166:1.57123:0.503455:1
ndhI	BG-AC	MA	0.0283941	0.280093	0.101374	5.06638e-11	495	30	20.2691	9.73095	0.072276	3.88767:4.71686:3.82999:4.08823:4.45812:1
ndhI	BS-AC	MA	0.0283941	0.280093	0.101374	5.06638e-11	495	30	20.2691	9.73095	0.072276	3.88767:4.71686:3.82999:4.08823:4.45812:1
ndhC	BC-EN	MA	0.0108355	0.106912	0.10135	0.000184418	360	11	8.62625	2.37375	0.0366963	2.07513:2.0632:1.19928:1.19928:0.0790627:1
ndhC	BG-EN	MA	0.0108355	0.106912	0.10135	0.000184418	360	11	8.62625	2.37375	0.0366963	2.07513:2.0632:1.19928:1.19928:0.0790627:1
ndhC	BH-EN	MA	0.0108355	0.106912	0.10135	0.000184418	360	11	8.62625	2.37375	0.0366963	2.07513:2.0632:1.19928:1.19928:0.0790627:1
ndhC	BS-EN	MA	0.0108355	0.106912	0.10135	0.000184418	360	11	8.62625	2.37375	0.0366963	2.07513:2.0632:1.19928:1.19928:0.0790627:1
ndhH	BS-CE	MA	0.031858	0.316555	0.10064	1.46794e-26	1179	84	60.7341	23.2659	0.0910905	1.9528:2.7992:0.951874:1.62143:1.02662:1
ndhH	BC-CE	MA	0.0313552	0.31288	0.100215	5.44728e-27	1179	84	61.3237	22.6763	0.0913834	1.94738:2.6051:1.0549:1.32795:0.949602:1
ndhH	BH-CE	MA	0.0313552	0.31288	0.100215	5.44728e-27	1179	84	61.3237	22.6763	0.0913834	1.94738:2.6051:1.0549:1.32795:0.949602:1
rpoB	BP-AC	MA	0.0317309	0.316989	0.100101	5.22986e-74	3207	241	173.462	67.538	0.0900706	2.15588:2.14519:1.59989:1.7979:0.392902:1
petA	BC-EN	MA	0.0260951	0.260772	0.100069	1.50428e-19	960	61	44.7022	16.2978	0.0766353	1.28702:1.39243:0.953628:1.05036:0.427309:1
petA	BH-EN	MA	0.0260951	0.260772	0.100069	1.50428e-19	960	61	44.7022	16.2978	0.0766353	1.28702:1.39243:0.953628:1.05036:0.427309:1
rpoC1	BC-AC	MA	0.0335343	0.335686	0.0998978	1.52752e-48	2016	154	108.555	45.4451	0.091745	2.0941:2.03798:1.50672:1.62626:0.493789:1
rpoC1	BH-AC	MA	0.0335343	0.335686	0.0998978	1.52752e-48	2016	154	108.555	45.4451	0.091745	2.0941:2.03798:1.50672:1.62626:0.493789:1
psaJ	BC-AC	MA	0.031467	0.315481	0.0997432	0.000177519	126	11	8.77756	2.22244	0.111731	0.684725:0.809568:0.463938:0.455366:0.267048:1
psaJ	BG-AC	MA	0.031467	0.315481	0.0997432	0.000177519	126	11	8.77756	2.22244	0.111731	0.684725:0.809568:0.463938:0.455366:0.267048:1
psaJ	BH-AC	MA	0.031467	0.315481	0.0997432	0.000177519	126	11	8.77756	2.22244	0.111731	0.684725:0.809568:0.463938:0.455366:0.267048:1
psaJ	BP-AC	MA	0.031467	0.315481	0.0997432	0.000177519	126	11	8.77756	2.22244	0.111731	0.684725:0.809568:0.463938:0.455366:0.267048:1
psaJ	BS-AC	MA	0.031467	0.315481	0.0997432	0.000177519	126	11	8.77756	2.22244	0.111731	0.684725:0.809568:0.463938:0.455366:0.267048:1
cemA	BP-VR	MA	0.0473706	0.475288	0.0996673	2.51802e-12	396	34	21.7294	12.2706	0.111566	0.951485:4.28402:0.199585:2.96369:2.00557:1
atpE	BG-VR	MA	0.0296812	0.298737	0.0993558	5.67755e-11	399	30	22.335	7.66495	0.090088	1.39807:1.84096:0.934269:0.987682:1.20363:1
atpE	BS-VR	MA	0.0296812	0.298737	0.0993558	5.67755e-11	399	30	22.335	7.66495	0.090088	1.39807:1.84096:0.934269:0.987682:1.20363:1
ycf4	BP-VR	MA	0.033463	0.340828	0.0981815	3.01183e-15	552	46	34.8797	11.1203	0.105831	1.41483:1.34183:0.996897:1.18079:0.250243:1
atpA	BG-CE	MA	0.021793	0.223643	0.0974453	7.50714e-28	1521	87	65.0982	21.9018	0.0671257	1.65771:1.7016:1.23167:1.60694:0.157594:1
ndhI	BP-EN	MA	0.0181627	0.187184	0.0970309	1.01256e-07	495	21	14.8111	6.18886	0.0500152	6.46012:6.87305:4.87452:8.84532:1.13646:1
ndhK	BC-VR	MA	0.0330062	0.340358	0.0969749	6.37344e-18	663	52	37.6021	14.3979	0.0951166	1.82467:2.2797:1.12366:1.17564:0.537837:1
ndhK	BG-VR	MA	0.0330062	0.340358	0.0969749	6.37344e-18	663	52	37.6021	14.3979	0.0951166	1.82467:2.2797:1.12366:1.17564:0.537837:1
ndhK	BH-VR	MA	0.0330062	0.340358	0.0969749	6.37344e-18	663	52	37.6021	14.3979	0.0951166	1.82467:2.2797:1.12366:1.17564:0.537837:1
ndhK	BS-VR	MA	0.0330062	0.340358	0.0969749	6.37344e-18	663	52	37.6021	14.3979	0.0951166	1.82467:2.2797:1.12366:1.17564:0.537837:1
ycf4	BC-VR	MA	0.0333124	0.34482	0.0966079	1.02994e-15	552	47	35.8737	11.1263	0.107297	1.05845:0.972322:0.721383:0.864272:0.206249:1
ycf4	BH-VR	MA	0.0333124	0.34482	0.0966079	1.02994e-15	552	47	35.8737	11.1263	0.107297	1.05845:0.972322:0.721383:0.864272:0.206249:1
ycf3	BC-EN	MA	0.0178298	0.185774	0.095976	2.81334e-08	501	23	16.8489	6.15111	0.0527903	1.7386:1.77149:1.19101:1.35228:0.551212:1
ycf3	BH-EN	MA	0.0178298	0.185774	0.095976	2.81334e-08	501	23	16.8489	6.15111	0.0527903	1.7386:1.77149:1.19101:1.35228:0.551212:1
atpE	BP-VR	MA	0.0262676	0.274206	0.0957953	1.51124e-10	399	28	21.2603	6.73972	0.083804	2.28849:2.6498:1.68546:1.83819:1.67784:1
psbH	BC-CE	MA	0.0159295	0.166902	0.0954422	0.000338211	219	9	6.64867	2.35133	0.0480143	9.33027:10.316:10.8149:14.716:3.80599:1
psbH	BG-CE	MA	0.0159295	0.166902	0.0954422	0.000338211	219	9	6.64867	2.35133	0.0480143	9.33027:10.316:10.8149:14.716:3.80599:1
psbH	BH-CE	MA	0.0159295	0.166902	0.0954422	0.000338211	219	9	6.64867	2.35133	0.0480143	9.33027:10.316:10.8149:14.716:3.80599:1
psbH	BP-CE	MA	0.0159295	0.166902	0.0954422	0.000338211	219	9	6.64867	2.35133	0.0480143	9.33027:10.316:10.8149:14.716:3.80599:1
psbH	BS-CE	MA	0.0159295	0.166902	0.0954422	0.000338211	219	9	6.64867	2.35133	0.0480143	9.33027:10.316:10.8149:14.716:3.80599:1
ndhI	BG-EN	MA	0.0191995	0.201972	0.0950601	1.76803e-08	495	22	15.5208	6.47922	0.0530998	5.18338:5.08127:4.35314:7.11682:1.25101:1
ndhI	BS-EN	MA	0.0191995	0.201972	0.0950601	1.76803e-08	495	22	15.5208	6.47922	0.0530998	5.18338:5.08127:4.35314:7.11682:1.25101:1
ycf4	BG-VR	MA	0.0327477	0.346346	0.0945518	2.02688e-16	552	46	35.1842	10.8158	0.106515	1.37899:1.26812:0.935798:1.27086:0.272958:1
ycf4	BS-VR	MA	0.0327477	0.346346	0.0945518	2.02688e-16	552	46	35.1842	10.8158	0.106515	1.37899:1.26812:0.935798:1.27086:0.272958:1
rpl23	BG-AC	MA	0.0333681	0.353889	0.0942899	1.6128e-11	405	31	23.431	7.56898	0.105787	3.93079:3.83794:2.92575:3.62209:0.335472:1
rpl23	BS-AC	MA	0.0333681	0.353889	0.0942899	1.6128e-11	405	31	23.431	7.56898	0.105787	3.93079:3.83794:2.92575:3.62209:0.335472:1
rpl16	BG-AC	MA	0.0333681	0.353889	0.0942899	1.6128e-11	405	31	23.431	7.56898	0.105787	3.93079:3.83794:2.92575:3.62209:0.335472:1
rpl16	BS-AC	MA	0.0333681	0.353889	0.0942899	1.6128e-11	405	31	23.431	7.56898	0.105787	3.93079:3.83794:2.92575:3.62209:0.335472:1
clpP	BG-EN	MA	0.0134259	0.142493	0.0942211	2.68039e-08	585	22	17.2679	4.7321	0.0464483	1.46962:1.64782:1.03914:1.05881:0.0873903:1
clpP	BS-EN	MA	0.0134259	0.142493	0.0942211	2.68039e-08	585	22	17.2679	4.7321	0.0464483	1.46962:1.64782:1.03914:1.05881:0.0873903:1
ycf4	BP-AC	MA	0.0381886	0.406241	0.0940047	1.34483e-17	552	52	39.9793	12.0207	0.125851	2.3078:2.16155:1.48445:1.54122:0.49865:1
ndhC	BP-EN	MA	0.0110804	0.118122	0.0938044	6.50102e-05	360	12	9.60728	2.39272	0.0403665	2.39285:2.27837:1.34052:1.34052:0.0847501:1
ndhH	BP-AC	MA	0.0361416	0.386685	0.0934652	8.96745e-33	1179	98	73.5167	24.4833	0.112962	2.53149:3.74641:0.944494:1.31976:0.491108:1
atpA	BC-CE	MA	0.0214742	0.230006	0.0933634	1.24415e-28	1521	88	66.42	21.58	0.0680218	1.6592:1.70413:1.23217:1.66684:0.156789:1
atpA	BH-CE	MA	0.0214742	0.230006	0.0933634	1.24415e-28	1521	88	66.42	21.58	0.0680218	1.6592:1.70413:1.23217:1.66684:0.156789:1
ycf4	BP-EN	MA	0.0183763	0.1969	0.0933283	2.89406e-10	552	28	21.4235	6.57651	0.0599978	1.82664:1.03455:0.609983:1.26086:0.481683:1
atpA	BS-CE	MA	0.0208831	0.224433	0.0930485	1.67236e-28	1521	86	65.0017	20.9983	0.0664019	1.60644:1.67421:1.18069:1.58047:0.163089:1
petA	BS-CE	MA	0.0262832	0.282586	0.0930096	2.32595e-22	960	66	50.2989	15.7011	0.08512	2.70156:2.87544:1.94885:2.06773:0.584489:1
atpE	BC-VR	MA	0.0327219	0.353378	0.0925974	5.97411e-12	399	33	24.8453	8.15469	0.10328	1.13617:1.76309:0.662576:0.815989:1.19137:1
atpE	BH-VR	MA	0.0327219	0.353378	0.0925974	5.97411e-12	399	33	24.8453	8.15469	0.10328	1.13617:1.76309:0.662576:0.815989:1.19137:1
ndhK	BP-VR	MA	0.0310311	0.337857	0.0918468	2.6877e-18	663	51	37.5126	13.4874	0.0934628	2.03452:2.525:1.21761:1.27169:0.426695:1
rpoB	BG-VR	MA	0.028618	0.312365	0.091617	1.7813e-75	3207	234	173.921	60.0785	0.0880985	1.79399:1.91788:1.16388:1.5157:0.325379:1
cemA	BC-VR	MA	0.0436868	0.477618	0.091468	9.45352e-13	396	33	21.7213	11.2787	0.108678	0.958998:4.56829:0.205066:3.04859:1.61051:1
cemA	BG-VR	MA	0.0436868	0.477618	0.091468	9.45352e-13	396	33	21.7213	11.2787	0.108678	0.958998:4.56829:0.205066:3.04859:1.61051:1
cemA	BH-VR	MA	0.0436868	0.477618	0.091468	9.45352e-13	396	33	21.7213	11.2787	0.108678	0.958998:4.56829:0.205066:3.04859:1.61051:1
cemA	BS-VR	MA	0.0436868	0.477618	0.091468	9.45352e-13	396	33	21.7213	11.2787	0.108678	0.958998:4.56829:0.205066:3.04859:1.61051:1
rpoB	BC-VR	MA	0.0292601	0.320208	0.0913783	1.24808e-77	3207	239	177.708	61.2915	0.0901992	1.69116:1.83539:1.04656:1.37986:0.362837:1
rpoB	BH-VR	MA	0.0292601	0.320208	0.0913783	1.24808e-77	3207	239	177.708	61.2915	0.0901992	1.69116:1.83539:1.04656:1.37986:0.362837:1
petA	BG-CE	MA	0.0262745	0.289153	0.090867	4.62035e-23	960	67	51.2842	15.7158	0.0863962	2.27621:2.437:1.63481:1.72037:0.49497:1
rpoB	BS-VR	MA	0.0281288	0.310571	0.0905713	2.38028e-76	3207	232	173.049	58.951	0.0874499	1.87198:2.00098:1.21575:1.58665:0.323253:1
atpE	BC-CE	MA	0.0231512	0.259312	0.0892794	1.32981e-09	399	26	19.8896	6.11042	0.0763276	1.54553:2.12961:1.06294:1.02773:1.92318:1
atpE	BH-CE	MA	0.0231512	0.259312	0.0892794	1.32981e-09	399	26	19.8896	6.11042	0.0763276	1.54553:2.12961:1.06294:1.02773:1.92318:1
atpA	BP-CE	MA	0.0208092	0.233209	0.0892298	5.68512e-30	1521	88	67.0157	20.9843	0.0679129	1.38964:1.4351:1.03933:1.38261:0.24164:1
psbT	BP-VR	MA	0.0280679	0.316478	0.0886883	0.000151518	105	9	7.37193	1.62807	0.110703	3.87306:3.95908:1.88816:1.88816:0.184639:1
rpoB	BS-EN	MA	0.0204482	0.230876	0.0885679	6.58828e-58	3207	176	129.608	46.3918	0.062188	0.846153:0.925233:0.555621:0.563983:0.324936:1
rpoB	BC-EN	MA	0.0215368	0.243895	0.0883032	4.28178e-61	3207	184	135.388	48.6121	0.0654274	0.792867:0.898442:0.475179:0.482499:0.39226:1
rpoB	BH-EN	MA	0.0215368	0.243895	0.0883032	4.28178e-61	3207	184	135.388	48.6121	0.0654274	0.792867:0.898442:0.475179:0.482499:0.39226:1
rpoB	BG-EN	MA	0.0204225	0.231295	0.0882962	5.33533e-58	3207	176	129.646	46.354	0.0621848	0.851245:0.932434:0.557042:0.564357:0.351616:1
ycf4	BG-EN	MA	0.018053	0.204983	0.0880708	1.67797e-10	552	27	20.3807	6.61931	0.0579291	1.4192:0.670303:0.41638:2.13314:0.398912:1
ycf4	BS-EN	MA	0.018053	0.204983	0.0880708	1.67797e-10	552	27	20.3807	6.61931	0.0579291	1.4192:0.670303:0.41638:2.13314:0.398912:1
rpoB	BP-VR	MA	0.0272519	0.310022	0.087903	3.1256e-76	3207	230	172.844	57.1559	0.0866341	1.97678:2.13322:1.24624:1.66883:0.368287:1
clpP	BC-EN	MA	0.0133569	0.151975	0.0878889	7.29295e-09	585	23	18.3081	4.69192	0.0487557	1.19558:1.35977:0.859112:0.876836:0.0762375:1
clpP	BH-EN	MA	0.0133569	0.151975	0.0878889	7.29295e-09	585	23	18.3081	4.69192	0.0487557	1.19558:1.35977:0.859112:0.876836:0.0762375:1
ycf4	BC-EN	MA	0.017692	0.201528	0.0877893	2.98006e-10	552	27	20.5658	6.4342	0.0579737	1.88675:1.28242:0.908282:2.68784:0.457341:1
ycf4	BH-EN	MA	0.017692	0.201528	0.0877893	2.98006e-10	552	27	20.5658	6.4342	0.0579737	1.88675:1.28242:0.908282:2.68784:0.457341:1
psbT	BP-AC	MA	0.0265575	0.302786	0.0877105	0.000358429	105	8	6.46328	1.53672	0.100998	6.43881:6.06989:7.22755:9.88676:1.7532:1
petA	BP-CE	MA	0.0247357	0.282535	0.0875492	6.38474e-23	960	65	50.234	14.766	0.0838983	2.64948:2.7838:1.93695:2.05296:0.553518:1
ycf3	BC-CE	MA	0.014578	0.168069	0.0867384	1.09504e-08	501	20	15.0436	4.95635	0.0465661	15.5426:15.1606:17.7519:16.7047:11.2881:1
ycf3	BH-CE	MA	0.014578	0.168069	0.0867384	1.09504e-08	501	20	15.0436	4.95635	0.0465661	15.5426:15.1606:17.7519:16.7047:11.2881:1
rps12	BG-VR	MA	0.00812163	0.0942767	0.0861468	0.000202263	369	10	7.79877	2.20123	0.0282681	21.5067:21.3243:23.1478:24.6572:0.01:1
rps12	BS-VR	MA	0.00812163	0.0942767	0.0861468	0.000202263	369	10	7.79877	2.20123	0.0282681	21.5067:21.3243:23.1478:24.6572:0.01:1
rps19	BC-AC	MA	0.0644698	0.748546	0.0861267	7.51992e-10	201	23	16.8045	6.1955	0.194013	1.95544:3.74294:1.08316:2.41624:1.18003:1
rps19	BG-AC	MA	0.0644698	0.748546	0.0861267	7.51992e-10	201	23	16.8045	6.1955	0.194013	1.95544:3.74294:1.08316:2.41624:1.18003:1
rps19	BH-AC	MA	0.0644698	0.748546	0.0861267	7.51992e-10	201	23	16.8045	6.1955	0.194013	1.95544:3.74294:1.08316:2.41624:1.18003:1
ndhH	BG-AC	MA	0.0371534	0.439821	0.0844739	2.30431e-37	1179	104	79.5383	24.4617	0.123922	1.86607:3.49158:0.393146:0.539029:0.830797:1
psbM	BC-VR	MA	0.0243248	0.288379	0.0843502	0.00135354	102	6	4.55361	1.44639	0.0797324	3.63075:5.61184:1.74129:1.73741:0.169915:1
psbM	BG-VR	MA	0.0243248	0.288379	0.0843502	0.00135354	102	6	4.55361	1.44639	0.0797324	3.63075:5.61184:1.74129:1.73741:0.169915:1
psbM	BH-VR	MA	0.0243248	0.288379	0.0843502	0.00135354	102	6	4.55361	1.44639	0.0797324	3.63075:5.61184:1.74129:1.73741:0.169915:1
psbM	BP-VR	MA	0.0243248	0.288379	0.0843502	0.00135354	102	6	4.55361	1.44639	0.0797324	3.63075:5.61184:1.74129:1.73741:0.169915:1
psbM	BS-VR	MA	0.0243248	0.288379	0.0843502	0.00135354	102	6	4.55361	1.44639	0.0797324	3.63075:5.61184:1.74129:1.73741:0.169915:1
ndhI	BC-EN	MA	0.0190211	0.225933	0.0841893	2.52728e-09	495	23	16.6599	6.34012	0.056503	5.871:6.24799:4.78853:8.84404:1.65823:1
ndhI	BH-EN	MA	0.0190211	0.225933	0.0841893	2.52728e-09	495	23	16.6599	6.34012	0.056503	5.871:6.24799:4.78853:8.84404:1.65823:1
psaJ	BC-EN	MA	0.0117287	0.139334	0.084177	0.000892024	126	5	4.02438	0.975617	0.0446168	2.11384:2.79758:2.10698:2.10698:7.59132:1
psaJ	BG-EN	MA	0.0117287	0.139334	0.084177	0.000892024	126	5	4.02438	0.975617	0.0446168	2.11384:2.79758:2.10698:2.10698:7.59132:1
psaJ	BH-EN	MA	0.0117287	0.139334	0.084177	0.000892024	126	5	4.02438	0.975617	0.0446168	2.11384:2.79758:2.10698:2.10698:7.59132:1
psaJ	BP-EN	MA	0.0117287	0.139334	0.084177	0.000892024	126	5	4.02438	0.975617	0.0446168	2.11384:2.79758:2.10698:2.10698:7.59132:1
psaJ	BS-EN	MA	0.0117287	0.139334	0.084177	0.000892024	126	5	4.02438	0.975617	0.0446168	2.11384:2.79758:2.10698:2.10698:7.59132:1
rpoB	BP-EN	MA	0.0195908	0.233072	0.0840548	2.02678e-59	3207	174	129.53	44.4698	0.0615781	0.823277:0.866043:0.581407:0.589642:0.275884:1
atpE	BG-CE	MA	0.0199798	0.237899	0.0839846	3.35884e-09	399	24	18.8222	5.17784	0.070949	17.3228:23.5252:12.4655:11.7139:14.1233:1
atpE	BS-CE	MA	0.0199798	0.237899	0.0839846	3.35884e-09	399	24	18.8222	5.17784	0.070949	17.3228:23.5252:12.4655:11.7139:14.1233:1
rps12	BP-AC	MA	0.0077504	0.0924929	0.0837946	0.000268867	369	10	7.92564	2.07436	0.0283018	6.68104:6.11659:4.40441:4.72564:0.01:1
rpl23	BP-AC	MA	0.0322705	0.386613	0.0834697	4.04045e-12	405	32	24.9064	7.09364	0.112581	4.431:4.35979:3.28734:4.08016:0.224232:1
rpl16	BP-AC	MA	0.0322705	0.386613	0.0834697	4.04045e-12	405	32	24.9064	7.09364	0.112581	4.431:4.35979:3.28734:4.08016:0.224232:1
petA	BC-CE	MA	0.0256986	0.309881	0.0829307	2.39851e-24	960	69	53.8937	15.1063	0.0905818	3.0662:3.25164:2.21478:2.49762:0.572794:1
petA	BH-CE	MA	0.0256986	0.309881	0.0829307	2.39851e-24	960	69	53.8937	15.1063	0.0905818	3.0662:3.25164:2.21478:2.49762:0.572794:1
ndhH	BS-AC	MA	0.0369103	0.447676	0.0824488	5.16075e-38	1179	104	79.5945	24.4055	0.123956	1.88421:3.61437:0.363191:0.839711:0.743079:1
ndhH	BC-AC	MA	0.0360412	0.443307	0.0813008	3.02296e-38	1179	104	80.4613	23.5387	0.124609	2.00117:3.63558:0.451162:0.608685:0.731201:1
ndhH	BH-AC	MA	0.0360412	0.443307	0.0813008	3.02296e-38	1179	104	80.4613	23.5387	0.124609	2.00117:3.63558:0.451162:0.608685:0.731201:1
petG	BC-CE	MA	0.12762	1.57399	0.0810803	0.000283882	111	9	6.96991	2.03009	0.442575	0.904835:14.7599:0.25452:0.377464:0.01:1
petG	BG-CE	MA	0.12762	1.57399	0.0810803	0.000283882	111	9	6.96991	2.03009	0.442575	0.904835:14.7599:0.25452:0.377464:0.01:1
petG	BH-CE	MA	0.12762	1.57399	0.0810803	0.000283882	111	9	6.96991	2.03009	0.442575	0.904835:14.7599:0.25452:0.377464:0.01:1
petG	BP-CE	MA	0.12762	1.57399	0.0810803	0.000283882	111	9	6.96991	2.03009	0.442575	0.904835:14.7599:0.25452:0.377464:0.01:1
petG	BS-CE	MA	0.12762	1.57399	0.0810803	0.000283882	111	9	6.96991	2.03009	0.442575	0.904835:14.7599:0.25452:0.377464:0.01:1
rps19	BS-AC	MA	0.0636507	0.792146	0.0803522	2.12315e-11	201	24	18.2032	5.79684	0.21043	2.54336:3.85469:1.62075:2.77455:0.895282:1
ycf3	BG-EN	MA	0.0150432	0.189871	0.0792285	6.36004e-09	501	22	16.81	5.18999	0.0507451	1.50421:1.62517:1.05182:1.25276:0.613655:1
ycf3	BP-EN	MA	0.0150432	0.189871	0.0792285	6.36004e-09	501	22	16.81	5.18999	0.0507451	1.50421:1.62517:1.05182:1.25276:0.613655:1
ycf3	BS-EN	MA	0.0150432	0.189871	0.0792285	6.36004e-09	501	22	16.81	5.18999	0.0507451	1.50421:1.62517:1.05182:1.25276:0.613655:1
petA	BS-VR	MA	0.0277403	0.355201	0.0780975	2.68297e-28	960	75	58.5462	16.4538	0.0989498	1.5946:2.05029:0.929374:1.16229:0.499533:1
ndhB	BC-AC	MA	0.00457929	0.0594639	0.0770097	4.59217e-10	1530	25	20.2141	4.7859	0.0180498	1.71443:1.83901:1.26084:1.78589:0.794999:1
ndhB	BH-AC	MA	0.00457929	0.0594639	0.0770097	4.59217e-10	1530	25	20.2141	4.7859	0.0180498	1.71443:1.83901:1.26084:1.78589:0.794999:1
rps19	BP-AC	MA	0.0560658	0.729139	0.0768931	4.19043e-10	201	22	16.7063	5.29371	0.187502	1.64322:2.98389:0.9469:0.9469:0.992056:1
petA	BG-VR	MA	0.0276405	0.364339	0.0758649	3.99131e-29	960	76	59.6112	16.3888	0.100457	1.42117:1.86195:0.81571:1.03777:0.457165:1
rpl36	BP-VR	MA	0.0261227	0.346338	0.0754255	0.000292464	111	9	7.69484	1.30516	0.124688	7.20542:1.99807:1.25856:1.23934:0.14564:1
petA	BP-VR	MA	0.0262775	0.354666	0.0740908	6.77505e-29	960	74	58.4201	15.5799	0.0976745	1.5764:1.95658:0.967056:1.18832:0.464604:1
ndhH	BP-VR	MA	0.0315831	0.427168	0.0739361	6.92012e-39	1179	101	79.6917	21.3083	0.117274	1.55062:1.5843:1.16322:1.41324:0.177136:1
atpE	BG-EN	MA	0.0171663	0.233967	0.0733703	1.27559e-09	399	23	18.6356	4.36442	0.0688841	3.17855:3.06717:2.16255:2.23211:0.929569:1
atpE	BS-EN	MA	0.0171663	0.233967	0.0733703	1.27559e-09	399	23	18.6356	4.36442	0.0688841	3.17855:3.06717:2.16255:2.23211:0.929569:1
atpE	BC-EN	MA	0.0200657	0.273918	0.0732543	1.58115e-11	399	26	21.0539	4.94608	0.0804065	2.30463:2.33073:1.62531:1.75298:0.451754:1
atpE	BH-EN	MA	0.0200657	0.273918	0.0732543	1.58115e-11	399	26	21.0539	4.94608	0.0804065	2.30463:2.33073:1.62531:1.75298:0.451754:1
atpA	BG-VR	MA	0.0262281	0.35867	0.0731258	1.90623e-45	1521	119	95.1149	23.8851	0.101203	2.13874:2.13567:1.57962:1.70034:0.254199:1
rps12	BC-VR	MA	0.00711066	0.0980173	0.0725449	9.32844e-06	369	10	8.02577	1.97423	0.0278144	20.0686:21.0287:19.4445:24.7297:0.01:1
rps12	BH-VR	MA	0.00711066	0.0980173	0.0725449	9.32844e-06	369	10	8.02577	1.97423	0.0278144	20.0686:21.0287:19.4445:24.7297:0.01:1
atpA	BP-VR	MA	0.0257925	0.365056	0.0706534	1.47957e-46	1521	120	96.3348	23.6652	0.101573	1.79132:1.81518:1.32476:1.46878:0.223191:1
atpB	BP-EN	MA	0.0134909	0.191176	0.0705682	9.04958e-27	1494	72	58.6692	13.3308	0.0555978	1.08175:1.10609:0.801947:1.08472:0.355908:1
atpA	BS-VR	MA	0.0252901	0.3589	0.0704657	7.36727e-45	1521	118	94.9711	23.0289	0.100408	2.09604:2.11234:1.55212:1.6764:0.2557:1
atpB	BP-VR	MA	0.0183017	0.259927	0.0704108	1.1505e-35	1494	97	79.7694	17.2306	0.0777016	1.61566:1.58555:1.18046:1.42295:0.188495:1
psbT	BC-VR	MA	0.0278124	0.395654	0.0702947	3.12967e-05	105	10	8.47299	1.52701	0.131029	4.96822:4.68886:2.24026:2.24026:0.178803:1
psbT	BG-VR	MA	0.0278124	0.395654	0.0702947	3.12967e-05	105	10	8.47299	1.52701	0.131029	4.96822:4.68886:2.24026:2.24026:0.178803:1
psbT	BH-VR	MA	0.0278124	0.395654	0.0702947	3.12967e-05	105	10	8.47299	1.52701	0.131029	4.96822:4.68886:2.24026:2.24026:0.178803:1
psbT	BS-VR	MA	0.0278124	0.395654	0.0702947	3.12967e-05	105	10	8.47299	1.52701	0.131029	4.96822:4.68886:2.24026:2.24026:0.178803:1
ndhH	BG-VR	MA	0.0323301	0.463991	0.0696782	4.93444e-43	1179	103	79.349	23.651	0.114119	1.58762:1.58745:1.19521:1.37069:0.241392:1
ycf3	BC-AC	MA	0.0195911	0.282065	0.0694559	3.62566e-13	501	31	24.6789	6.32114	0.0755825	2.80257:2.51397:1.81558:1.82178:1.49955:1
ycf3	BH-AC	MA	0.0195911	0.282065	0.0694559	3.62566e-13	501	31	24.6789	6.32114	0.0755825	2.80257:2.51397:1.81558:1.82178:1.49955:1
petA	BC-VR	MA	0.0272734	0.392696	0.0694517	3.14684e-32	960	78	62.0844	15.9156	0.10517	1.59152:2.02163:0.930087:1.3812:0.479168:1
petA	BH-VR	MA	0.0272734	0.392696	0.0694517	3.14684e-32	960	78	62.0844	15.9156	0.10517	1.59152:2.02163:0.930087:1.3812:0.479168:1
atpA	BC-VR	MA	0.0249194	0.36057	0.0691111	5.5527e-46	1521	118	95.4153	22.5847	0.100774	2.142:2.14007:1.58448:1.64126:0.253168:1
atpA	BH-VR	MA	0.0249194	0.36057	0.0691111	5.5527e-46	1521	118	95.4153	22.5847	0.100774	2.142:2.14007:1.58448:1.64126:0.253168:1
psbT	BC-AC	MA	0.0264482	0.382979	0.069059	7.96227e-05	105	9	7.56158	1.43842	0.121408	8.08948:6.91961:7.77664:10.9972:1.70511:1
psbT	BG-AC	MA	0.0264482	0.382979	0.069059	7.96227e-05	105	9	7.56158	1.43842	0.121408	8.08948:6.91961:7.77664:10.9972:1.70511:1
psbT	BH-AC	MA	0.0264482	0.382979	0.069059	7.96227e-05	105	9	7.56158	1.43842	0.121408	8.08948:6.91961:7.77664:10.9972:1.70511:1
psbT	BS-AC	MA	0.0264482	0.382979	0.069059	7.96227e-05	105	9	7.56158	1.43842	0.121408	8.08948:6.91961:7.77664:10.9972:1.70511:1
atpA	BG-EN	MA	0.0181797	0.263836	0.0689054	8.21516e-34	1521	87	68.8789	18.1211	0.0691659	0.768609:0.920386:0.468997:0.822864:0.212969:1
atpA	BP-AC	MA	0.0240072	0.349736	0.0686438	4.36235e-45	1521	118	95.9948	22.0052	0.0990693	2.31478:2.38521:1.73242:1.94495:0.436586:1
ndhI	BG-CE	MA	0.0236798	0.345807	0.0684772	1.21331e-13	495	31	23.754	7.246	0.082735	4.92201:4.42374:3.49116:4.38847:1.54063:1
ndhI	BS-CE	MA	0.0236798	0.345807	0.0684772	1.21331e-13	495	31	23.754	7.246	0.082735	4.92201:4.42374:3.49116:4.38847:1.54063:1
ndhH	BS-VR	MA	0.0318487	0.468199	0.0680239	3.69484e-43	1179	103	79.7152	23.2848	0.114271	1.57184:1.57766:1.18371:1.44076:0.221503:1
psbF	BP-EN	MA	0.0125953	0.185234	0.0679966	0	117	6	5.21788	0.782122	0.0664704	8.55937:5.44451:2.40984:2.40984:0.01:1
ycf3	BG-CE	MA	0.0115189	0.170784	0.0674472	2.42601e-09	501	19	15.1047	3.89532	0.0445371	15.2324:15.4907:17.9103:16.8315:12.3608:1
ycf3	BP-CE	MA	0.0115189	0.170784	0.0674472	2.42601e-09	501	19	15.1047	3.89532	0.0445371	15.2324:15.4907:17.9103:16.8315:12.3608:1
ycf3	BS-CE	MA	0.0115189	0.170784	0.0674472	2.42601e-09	501	19	15.1047	3.89532	0.0445371	15.2324:15.4907:17.9103:16.8315:12.3608:1
ndhH	BP-EN	MA	0.0175444	0.260254	0.0674125	4.77662e-25	1179	63	49.9526	13.0474	0.0673352	0.70276:0.889393:0.476501:0.642276:0.271483:1
atpB	BC-VR	MA	0.018309	0.272713	0.0671365	2.08106e-37	1494	100	82.9593	17.0407	0.0809763	1.75042:1.72657:1.30091:1.53547:0.261697:1
atpB	BG-VR	MA	0.018309	0.272713	0.0671365	2.08106e-37	1494	100	82.9593	17.0407	0.0809763	1.75042:1.72657:1.30091:1.53547:0.261697:1
atpB	BH-VR	MA	0.018309	0.272713	0.0671365	2.08106e-37	1494	100	82.9593	17.0407	0.0809763	1.75042:1.72657:1.30091:1.53547:0.261697:1
atpA	BP-EN	MA	0.0191099	0.284865	0.0670839	3.63517e-37	1521	91	72.0726	18.9274	0.0731829	0.664812:0.834818:0.374082:0.724272:0.305771:1
ndhI	BP-VR	MA	0.0210558	0.314369	0.0669779	2.1482e-14	495	30	23.0095	6.99047	0.0740392	2.39289:3.75417:1.24988:1.38814:1.81915:1
atpB	BS-VR	MA	0.0183049	0.273359	0.0669631	1.82654e-37	1494	100	82.9682	17.0318	0.0810397	1.61326:1.59583:1.20229:1.41834:0.218572:1
psbT	BP-EN	MA	0.0248307	0.371266	0.0668812	0.000122571	105	9	7.67748	1.32252	0.121719	2.38433:2.13518:1.02998:1.02998:0.0234864:1
ndhH	BC-VR	MA	0.0313641	0.470226	0.0666999	4.61835e-44	1179	103	80.3121	22.6879	0.115191	1.6288:1.62095:1.22133:1.40562:0.22505:1
ndhH	BH-VR	MA	0.0313641	0.470226	0.0666999	4.61835e-44	1179	103	80.3121	22.6879	0.115191	1.6288:1.62095:1.22133:1.40562:0.22505:1
rpl2	BC-CE	MA	0.00330194	0.0496355	0.0665239	3.14662e-06	822	11	9.00847	1.99153	0.0140193	8.85898:13.0698:3.58518:3.58518:0.01:1
rpl2	BG-CE	MA	0.00330194	0.0496355	0.0665239	3.14662e-06	822	11	9.00847	1.99153	0.0140193	8.85898:13.0698:3.58518:3.58518:0.01:1
rpl2	BH-CE	MA	0.00330194	0.0496355	0.0665239	3.14662e-06	822	11	9.00847	1.99153	0.0140193	8.85898:13.0698:3.58518:3.58518:0.01:1
rpl2	BP-CE	MA	0.00330194	0.0496355	0.0665239	3.14662e-06	822	11	9.00847	1.99153	0.0140193	8.85898:13.0698:3.58518:3.58518:0.01:1
rpl2	BS-CE	MA	0.00330194	0.0496355	0.0665239	3.14662e-06	822	11	9.00847	1.99153	0.0140193	8.85898:13.0698:3.58518:3.58518:0.01:1
psbT	BC-CE	MA	0.0128097	0.192839	0.0664268	0	105	5	4.19038	0.809621	0.0588695	6.29934:5.30156:3.92988:3.92988:3.85014:1
psbT	BG-CE	MA	0.0128097	0.192839	0.0664268	0	105	5	4.19038	0.809621	0.0588695	6.29934:5.30156:3.92988:3.92988:3.85014:1
psbT	BH-CE	MA	0.0128097	0.192839	0.0664268	0	105	5	4.19038	0.809621	0.0588695	6.29934:5.30156:3.92988:3.92988:3.85014:1
psbT	BS-CE	MA	0.0128097	0.192839	0.0664268	0	105	5	4.19038	0.809621	0.0588695	6.29934:5.30156:3.92988:3.92988:3.85014:1
psbH	BC-AC	MA	0.0209865	0.316691	0.0662681	3.87302e-08	219	15	12.09	2.90997	0.0848247	17.9795:15.6954:15.4615:19.4697:3.42546:1
psbH	BG-AC	MA	0.0209865	0.316691	0.0662681	3.87302e-08	219	15	12.09	2.90997	0.0848247	17.9795:15.6954:15.4615:19.4697:3.42546:1
psbH	BH-AC	MA	0.0209865	0.316691	0.0662681	3.87302e-08	219	15	12.09	2.90997	0.0848247	17.9795:15.6954:15.4615:19.4697:3.42546:1
psbH	BP-AC	MA	0.0209865	0.316691	0.0662681	3.87302e-08	219	15	12.09	2.90997	0.0848247	17.9795:15.6954:15.4615:19.4697:3.42546:1
psbH	BS-AC	MA	0.0209865	0.316691	0.0662681	3.87302e-08	219	15	12.09	2.90997	0.0848247	17.9795:15.6954:15.4615:19.4697:3.42546:1
atpA	BG-AC	MA	0.0227329	0.343101	0.0662571	3.44082e-45	1521	115	94.4288	20.5712	0.0974466	2.95641:2.99906:2.19329:2.37725:0.448605:1
ndhB	BG-AC	MA	0.00386613	0.0584156	0.0661833	1.79645e-09	1530	24	19.9635	4.03652	0.0173183	1.70123:1.84797:1.23891:1.78721:0.667301:1
ndhB	BP-AC	MA	0.00386613	0.0584156	0.0661833	1.79645e-09	1530	24	19.9635	4.03652	0.0173183	1.70123:1.84797:1.23891:1.78721:0.667301:1
ndhB	BS-AC	MA	0.00386613	0.0584156	0.0661833	1.79645e-09	1530	24	19.9635	4.03652	0.0173183	1.70123:1.84797:1.23891:1.78721:0.667301:1
petD	BP-CE	MA	0.0108273	0.163656	0.0661588	2.38275e-08	477	19	15.6922	3.30777	0.0473356	7.06861:7.61116:3.27244:3.26556:0.461049:1
atpA	BC-EN	MA	0.0179589	0.271709	0.0660962	3.8941e-36	1521	88	70.0628	17.9372	0.0700276	0.766087:0.918863:0.466171:0.888308:0.212737:1
atpA	BH-EN	MA	0.0179589	0.271709	0.0660962	3.8941e-36	1521	88	70.0628	17.9372	0.0700276	0.766087:0.918863:0.466171:0.888308:0.212737:1
atpB	BS-EN	MA	0.0135744	0.206378	0.0657745	1.3175e-28	1494	75	61.8746	13.1254	0.0592073	1.03894:1.0752:0.773838:1.03463:0.369287:1
atpE	BP-EN	MA	0.0136767	0.20869	0.0655358	1.97045e-09	399	21	17.4761	3.52393	0.0615111	22.4565:20.2033:16.2552:17.6036:7.33689:1
atpA	BS-EN	MA	0.0174006	0.267429	0.0650661	6.48496e-35	1521	86	68.615	17.385	0.0684888	0.72597:0.920567:0.405641:0.816497:0.240931:1
ndhH	BG-EN	MA	0.0186493	0.290412	0.0642168	4.55542e-28	1179	65	51.1226	13.8774	0.0706401	0.63331:1.16742:0.306348:0.797997:0.589854:1
ndhI	BP-CE	MA	0.0232169	0.365487	0.0635232	2.02366e-15	495	32	25.1087	6.89126	0.0875464	6.11006:5.69536:4.37093:5.50798:1.39153:1
atpA	BS-AC	MA	0.021777	0.343375	0.0634207	6.07508e-46	1521	114	94.2922	19.7078	0.0966441	2.89578:2.96911:2.14002:2.33663:0.456002:1
atpI	BC-CE	MA	0.017439	0.276105	0.0631607	1.08554e-16	741	39	30.9755	8.02452	0.0681419	1.73971:4.43816:0.325186:1.74703:2.43757:1
atpI	BH-CE	MA	0.017439	0.276105	0.0631607	1.08554e-16	741	39	30.9755	8.02452	0.0681419	1.73971:4.43816:0.325186:1.74703:2.43757:1
atpA	BC-AC	MA	0.0221611	0.351234	0.0630949	3.86934e-46	1521	116	95.9305	20.0695	0.0984099	3.04572:3.09446:2.27659:2.60758:0.449464:1
atpA	BH-AC	MA	0.0221611	0.351234	0.0630949	3.86934e-46	1521	116	95.9305	20.0695	0.0984099	3.04572:3.09446:2.27659:2.60758:0.449464:1
psaB	BC-CE	MA	0.0102373	0.163232	0.0627163	6.66565e-34	2202	88	72.8446	15.1554	0.0456744	1.54268:2.95558:0.37595:0.925848:0.717342:1
psaB	BH-CE	MA	0.0102373	0.163232	0.0627163	6.66565e-34	2202	88	72.8446	15.1554	0.0456744	1.54268:2.95558:0.37595:0.925848:0.717342:1
petD	BC-CE	MA	0.0109016	0.174065	0.0626295	6.33847e-09	477	20	16.6853	3.31474	0.0500105	7.36068:8.26292:3.3516:3.34417:0.468763:1
petD	BG-CE	MA	0.0109016	0.174065	0.0626295	6.33847e-09	477	20	16.6853	3.31474	0.0500105	7.36068:8.26292:3.3516:3.34417:0.468763:1
petD	BH-CE	MA	0.0109016	0.174065	0.0626295	6.33847e-09	477	20	16.6853	3.31474	0.0500105	7.36068:8.26292:3.3516:3.34417:0.468763:1
petD	BS-CE	MA	0.0109016	0.174065	0.0626295	6.33847e-09	477	20	16.6853	3.31474	0.0500105	7.36068:8.26292:3.3516:3.34417:0.468763:1
ndhI	BC-CE	MA	0.0233714	0.375448	0.0622495	1.78992e-14	495	32	24.9998	7.0002	0.0874063	5.09054:4.89467:3.8499:4.75164:1.52434:1
ndhI	BH-CE	MA	0.0233714	0.375448	0.0622495	1.78992e-14	495	32	24.9998	7.0002	0.0874063	5.09054:4.89467:3.8499:4.75164:1.52434:1
ndhH	BS-EN	MA	0.0185222	0.299893	0.0617629	4.88799e-29	1179	65	51.0138	13.9862	0.0702544	0.608661:1.14559:0.279358:1.11615:0.5277:1
rpl23	BC-VR	MA	0.0317705	0.517978	0.0613357	4.76158e-16	405	35	29.2544	5.74561	0.147477	8.20294:8.56871:4.49278:4.73386:0.0544892:1
rpl23	BH-VR	MA	0.0317705	0.517978	0.0613357	4.76158e-16	405	35	29.2544	5.74561	0.147477	8.20294:8.56871:4.49278:4.73386:0.0544892:1
rpl16	BC-VR	MA	0.0317705	0.517978	0.0613357	4.76158e-16	405	35	29.2544	5.74561	0.147477	8.20294:8.56871:4.49278:4.73386:0.0544892:1
rpl16	BH-VR	MA	0.0317705	0.517978	0.0613357	4.76158e-16	405	35	29.2544	5.74561	0.147477	8.20294:8.56871:4.49278:4.73386:0.0544892:1
ndhE	BC-VR	MA	0.0180025	0.295922	0.0608355	3.94796e-09	300	18	14.5039	3.4961	0.0740093	10.5257:11.0733:10.8995:10.7665:4.12074:1
ndhE	BG-VR	MA	0.0180025	0.295922	0.0608355	3.94796e-09	300	18	14.5039	3.4961	0.0740093	10.5257:11.0733:10.8995:10.7665:4.12074:1
ndhE	BH-VR	MA	0.0180025	0.295922	0.0608355	3.94796e-09	300	18	14.5039	3.4961	0.0740093	10.5257:11.0733:10.8995:10.7665:4.12074:1
ndhE	BP-VR	MA	0.0180025	0.295922	0.0608355	3.94796e-09	300	18	14.5039	3.4961	0.0740093	10.5257:11.0733:10.8995:10.7665:4.12074:1
ndhE	BS-VR	MA	0.0180025	0.295922	0.0608355	3.94796e-09	300	18	14.5039	3.4961	0.0740093	10.5257:11.0733:10.8995:10.7665:4.12074:1
ndhH	BC-EN	MA	0.0175759	0.290697	0.0604614	1.07878e-27	1179	65	51.9694	13.0306	0.0706395	0.689157:1.16542:0.349764:0.848231:0.498659:1
ndhH	BH-EN	MA	0.0175759	0.290697	0.0604614	1.07878e-27	1179	65	51.9694	13.0306	0.0706395	0.689157:1.16542:0.349764:0.848231:0.498659:1
ndhI	BC-VR	MA	0.0182969	0.305324	0.0599261	3.4882e-13	495	28	21.8594	6.1406	0.0687618	1.99622:2.80139:1.27174:1.36705:1.665:1
ndhI	BH-VR	MA	0.0182969	0.305324	0.0599261	3.4882e-13	495	28	21.8594	6.1406	0.0687618	1.99622:2.80139:1.27174:1.36705:1.665:1
atpB	BS-CE	MA	0.0111166	0.187259	0.0593648	1.90674e-28	1494	70	59.2019	10.7981	0.0543689	2.89772:2.67829:1.87678:2.34674:0.444442:1
atpB	BC-CE	MA	0.0110789	0.187545	0.0590732	1.82358e-28	1494	70	59.2381	10.7619	0.0543796	3.38962:3.1214:2.218:2.81575:0.622809:1
atpB	BG-CE	MA	0.0110789	0.187545	0.0590732	1.82358e-28	1494	70	59.2381	10.7619	0.0543796	3.38962:3.1214:2.218:2.81575:0.622809:1
atpB	BH-CE	MA	0.0110789	0.187545	0.0590732	1.82358e-28	1494	70	59.2381	10.7619	0.0543796	3.38962:3.1214:2.218:2.81575:0.622809:1
psaB	BG-CE	MA	0.00967436	0.165566	0.0584321	2.73123e-35	2202	88	73.6605	14.3395	0.045664	1.57749:2.7583:0.461493:0.999629:0.678616:1
psaB	BS-CE	MA	0.00967436	0.165566	0.0584321	2.73123e-35	2202	88	73.6605	14.3395	0.045664	1.57749:2.7583:0.461493:0.999629:0.678616:1
atpB	BP-CE	MA	0.0108237	0.185976	0.0581997	6.67699e-28	1494	69	58.5091	10.4909	0.0537444	2.85098:2.70089:1.94897:2.47333:0.321412:1
ycf3	BG-AC	MA	0.0165467	0.285385	0.0579801	6.23211e-14	501	30	24.6537	5.34634	0.0732611	2.52362:2.37153:1.74823:1.75694:1.442:1
ycf3	BP-AC	MA	0.0165467	0.285385	0.0579801	6.23211e-14	501	30	24.6537	5.34634	0.0732611	2.52362:2.37153:1.74823:1.75694:1.442:1
ycf3	BS-AC	MA	0.0165467	0.285385	0.0579801	6.23211e-14	501	30	24.6537	5.34634	0.0732611	2.52362:2.37153:1.74823:1.75694:1.442:1
atpB	BC-EN	MA	0.011903	0.205333	0.0579694	6.22777e-30	1494	73	61.5153	11.4847	0.0577329	1.12048:1.16143:0.83421:1.13648:0.381936:1
atpB	BG-EN	MA	0.011903	0.205333	0.0579694	6.22777e-30	1494	73	61.5153	11.4847	0.0577329	1.12048:1.16143:0.83421:1.13648:0.381936:1
atpB	BH-EN	MA	0.011903	0.205333	0.0579694	6.22777e-30	1494	73	61.5153	11.4847	0.0577329	1.12048:1.16143:0.83421:1.13648:0.381936:1
atpI	BP-CE	MA	0.0159961	0.27722	0.0577017	2.36985e-17	741	38	30.7036	7.29637	0.0670323	2.59372:7.78653:0.262282:2.8082:3.5507:1
psbT	BP-CE	MA	0.0133532	0.237355	0.0562585	8.47594e-05	105	6	5.19382	0.806178	0.0729436	7.86274:5.99125:4.18552:4.18552:3.61539:1
atpI	BG-CE	MA	0.015749	0.280036	0.056239	8.31235e-18	741	39	31.7897	7.2103	0.0682598	1.21547:3.24677:0.222298:1.10821:1.53181:1
atpI	BS-CE	MA	0.015749	0.280036	0.056239	8.31235e-18	741	39	31.7897	7.2103	0.0682598	1.21547:3.24677:0.222298:1.10821:1.53181:1
ndhI	BG-VR	MA	0.0183605	0.327013	0.0561459	4.04469e-14	495	29	22.8629	6.13711	0.0717518	1.96204:3.17692:1.16218:1.29071:1.89884:1
ndhI	BS-VR	MA	0.0183605	0.327013	0.0561459	4.04469e-14	495	29	22.8629	6.13711	0.0717518	1.96204:3.17692:1.16218:1.29071:1.89884:1
ndhC	BC-VR	MA	0.0107357	0.196525	0.0546279	1.47933e-07	360	16	13.7761	2.22391	0.05771	2.06896:1.90159:1.14667:1.13361:0.789845:1
ndhC	BG-VR	MA	0.0107357	0.196525	0.0546279	1.47933e-07	360	16	13.7761	2.22391	0.05771	2.06896:1.90159:1.14667:1.13361:0.789845:1
ndhC	BH-VR	MA	0.0107357	0.196525	0.0546279	1.47933e-07	360	16	13.7761	2.22391	0.05771	2.06896:1.90159:1.14667:1.13361:0.789845:1
ndhC	BS-VR	MA	0.0107357	0.196525	0.0546279	1.47933e-07	360	16	13.7761	2.22391	0.05771	2.06896:1.90159:1.14667:1.13361:0.789845:1
psaB	BP-CE	MA	0.00951723	0.175049	0.054369	3.6397e-37	2202	90	75.9068	14.0932	0.0470112	1.16086:2.28383:0.274807:0.761285:0.554705:1
psbT	BC-EN	MA	0.0251306	0.472785	0.0531544	2.42801e-05	105	10	8.76379	1.23621	0.147649	3.19674:2.44062:1.08198:1.08198:0.0100028:1
psbT	BG-EN	MA	0.0251306	0.472785	0.0531544	2.42801e-05	105	10	8.76379	1.23621	0.147649	3.19674:2.44062:1.08198:1.08198:0.0100028:1
psbT	BH-EN	MA	0.0251306	0.472785	0.0531544	2.42801e-05	105	10	8.76379	1.23621	0.147649	3.19674:2.44062:1.08198:1.08198:0.0100028:1
psbT	BS-EN	MA	0.0251306	0.472785	0.0531544	2.42801e-05	105	10	8.76379	1.23621	0.147649	3.19674:2.44062:1.08198:1.08198:0.0100028:1
petB	BC-AC	MA	0.0127125	0.239612	0.0530545	1.73571e-15	645	35	30.4256	4.57438	0.0718962	8.36993:4.67716:1.49708:1.69854:0.132379:1
petB	BG-AC	MA	0.0127125	0.239612	0.0530545	1.73571e-15	645	35	30.4256	4.57438	0.0718962	8.36993:4.67716:1.49708:1.69854:0.132379:1
petB	BH-AC	MA	0.0127125	0.239612	0.0530545	1.73571e-15	645	35	30.4256	4.57438	0.0718962	8.36993:4.67716:1.49708:1.69854:0.132379:1
petB	BS-AC	MA	0.0127125	0.239612	0.0530545	1.73571e-15	645	35	30.4256	4.57438	0.0718962	8.36993:4.67716:1.49708:1.69854:0.132379:1
petB	BP-AC	MA	0.0126221	0.240241	0.0525392	8.98205e-16	645	35	30.3565	4.64353	0.0708146	6.49128:3.86526:1.41022:1.54611:0.253807:1
ndhC	BP-VR	MA	0.0109576	0.209666	0.0522621	4.79093e-08	360	17	14.7671	2.2329	0.0619967	2.32084:2.04643:1.24105:1.22605:0.855132:1
atpI	BC-EN	MA	0.0133152	0.258246	0.0515602	6.70884e-19	741	41	35.2515	5.74849	0.0721543	0.866718:0.950715:0.646198:0.649659:0.418898:1
atpI	BH-EN	MA	0.0133152	0.258246	0.0515602	6.70884e-19	741	41	35.2515	5.74849	0.0721543	0.866718:0.950715:0.646198:0.649659:0.418898:1
rpl23	BG-VR	MA	0.0249223	0.484018	0.0514904	1.58545e-15	405	32	27.4393	4.56065	0.133508	7.62667:7.48635:4.23313:4.49653:0.0594603:1
rpl23	BS-VR	MA	0.0249223	0.484018	0.0514904	1.58545e-15	405	32	27.4393	4.56065	0.133508	7.62667:7.48635:4.23313:4.49653:0.0594603:1
rpl16	BG-VR	MA	0.0249223	0.484018	0.0514904	1.58545e-15	405	32	27.4393	4.56065	0.133508	7.62667:7.48635:4.23313:4.49653:0.0594603:1
rpl16	BS-VR	MA	0.0249223	0.484018	0.0514904	1.58545e-15	405	32	27.4393	4.56065	0.133508	7.62667:7.48635:4.23313:4.49653:0.0594603:1
psbF	BC-EN	MA	0.012614	0.247756	0.0509129	0.000147164	117	7	6.26411	0.735886	0.0837096	12.3644:5.79647:2.39389:2.39389:0.01:1
psbF	BG-EN	MA	0.012614	0.247756	0.0509129	0.000147164	117	7	6.26411	0.735886	0.0837096	12.3644:5.79647:2.39389:2.39389:0.01:1
psbF	BH-EN	MA	0.012614	0.247756	0.0509129	0.000147164	117	7	6.26411	0.735886	0.0837096	12.3644:5.79647:2.39389:2.39389:0.01:1
psbF	BS-EN	MA	0.012614	0.247756	0.0509129	0.000147164	117	7	6.26411	0.735886	0.0837096	12.3644:5.79647:2.39389:2.39389:0.01:1
petB	BC-CE	MA	0.00858384	0.168681	0.0508882	1.32401e-11	645	25	21.6159	3.38406	0.0478576	8.88287:8.56294:5.73949:5.71379:0.708015:1
petB	BG-CE	MA	0.00858384	0.168681	0.0508882	1.32401e-11	645	25	21.6159	3.38406	0.0478576	8.88287:8.56294:5.73949:5.71379:0.708015:1
petB	BH-CE	MA	0.00858384	0.168681	0.0508882	1.32401e-11	645	25	21.6159	3.38406	0.0478576	8.88287:8.56294:5.73949:5.71379:0.708015:1
petB	BS-CE	MA	0.00858384	0.168681	0.0508882	1.32401e-11	645	25	21.6159	3.38406	0.0478576	8.88287:8.56294:5.73949:5.71379:0.708015:1
petB	BP-CE	MA	0.00845811	0.169146	0.0500048	1.06048e-11	645	25	21.6293	3.37069	0.0474933	6.25127:6.14871:3.67721:3.65345:0.863801:1
atpI	BP-EN	MA	0.0119049	0.239146	0.0497808	3.39793e-17	741	38	32.7582	5.2418	0.0658253	0.917289:1.20097:0.603502:0.611326:0.58331:1
atpI	BP-AC	MA	0.0176869	0.365774	0.0483548	7.96039e-23	741	47	39.6338	7.36624	0.0895518	1.61159:3.67102:0.417867:0.708279:1.50816:1
ndhJ	BP-AC	MA	0.0227959	0.483754	0.047123	1.55543e-20	474	42	35.9764	6.02357	0.124037	3.32598:3.29978:2.36329:2.36329:0.39079:1
psbJ	BP-AC	MA	0.0111815	0.237424	0.0470952	4.45272e-05	120	7	6.16719	0.832807	0.0696823	4.9796:4.25362:3.11483:3.10537:0.259313:1
atpB	BP-AC	MA	0.0127303	0.271844	0.0468294	5.95911e-41	1494	91	79.2238	11.7762	0.0748056	2.23427:2.66356:1.27678:1.8486:0.388292:1
psbE	BC-CE	MA	0.00565211	0.122678	0.0460728	7.81583e-06	249	7	6.03946	0.960544	0.031938	23.1187:30:18.0684:18.0684:0.01:1
psbE	BG-CE	MA	0.00565211	0.122678	0.0460728	7.81583e-06	249	7	6.03946	0.960544	0.031938	23.1187:30:18.0684:18.0684:0.01:1
psbE	BH-CE	MA	0.00565211	0.122678	0.0460728	7.81583e-06	249	7	6.03946	0.960544	0.031938	23.1187:30:18.0684:18.0684:0.01:1
psbE	BS-CE	MA	0.00565211	0.122678	0.0460728	7.81583e-06	249	7	6.03946	0.960544	0.031938	23.1187:30:18.0684:18.0684:0.01:1
atpI	BP-VR	MA	0.0180734	0.394476	0.0458163	2.30906e-27	741	56	48.3693	7.63072	0.102786	1.47911:1.81662:1.00858:1.17948:1.24749:1
atpI	BC-VR	MA	0.0190802	0.418583	0.0455828	4.99328e-29	741	59	51.1566	7.84335	0.110635	1.33699:1.44384:1.0057:1.11062:0.852423:1
atpI	BH-VR	MA	0.0190802	0.418583	0.0455828	4.99328e-29	741	59	51.1566	7.84335	0.110635	1.33699:1.44384:1.0057:1.11062:0.852423:1
ndhJ	BC-AC	MA	0.0224719	0.501379	0.0448202	6.66527e-23	474	43	37.063	5.93697	0.127175	2.74834:2.7337:2.00017:2.00017:0.289186:1
ndhJ	BG-AC	MA	0.0224719	0.501379	0.0448202	6.66527e-23	474	43	37.063	5.93697	0.127175	2.74834:2.7337:2.00017:2.00017:0.289186:1
ndhJ	BH-AC	MA	0.0224719	0.501379	0.0448202	6.66527e-23	474	43	37.063	5.93697	0.127175	2.74834:2.7337:2.00017:2.00017:0.289186:1
ndhJ	BS-AC	MA	0.0224719	0.501379	0.0448202	6.66527e-23	474	43	37.063	5.93697	0.127175	2.74834:2.7337:2.00017:2.00017:0.289186:1
atpB	BC-AC	MA	0.0128332	0.286819	0.0447432	6.68765e-43	1494	94	82.3101	11.6899	0.0784714	2.37672:2.87847:1.33626:1.90463:0.528855:1
atpB	BG-AC	MA	0.0128332	0.286819	0.0447432	6.68765e-43	1494	94	82.3101	11.6899	0.0784714	2.37672:2.87847:1.33626:1.90463:0.528855:1
atpB	BH-AC	MA	0.0128332	0.286819	0.0447432	6.68765e-43	1494	94	82.3101	11.6899	0.0784714	2.37672:2.87847:1.33626:1.90463:0.528855:1
atpB	BS-AC	MA	0.0128374	0.287774	0.0446095	5.85249e-43	1494	94	82.3209	11.6791	0.0786067	2.1274:2.60027:1.17351:1.68201:0.414732:1
psbE	BP-CE	MA	0.00610629	0.13709	0.0445423	2.59845e-06	249	8	7.00198	0.998023	0.037293	29.4309:30:22.6183:22.6183:0.01:1
psaA	BC-VR	MA	0.00934999	0.210204	0.0444805	4.64477e-49	2250	110	96.3242	13.6758	0.057265	3.11725:3.05672:2.31789:2.70715:0.983948:1
psaA	BH-VR	MA	0.00934999	0.210204	0.0444805	4.64477e-49	2250	110	96.3242	13.6758	0.057265	3.11725:3.05672:2.31789:2.70715:0.983948:1
atpI	BG-AC	MA	0.0169915	0.385372	0.044091	2.46742e-25	741	50	43.1764	6.82357	0.0973471	1.3203:2.35392:0.523321:0.621231:0.789516:1
atpI	BS-AC	MA	0.0169915	0.385372	0.044091	2.46742e-25	741	50	43.1764	6.82357	0.0973471	1.3203:2.35392:0.523321:0.621231:0.789516:1
atpI	BC-AC	MA	0.0173564	0.394294	0.0440188	7.66397e-26	741	50	43.0075	6.99247	0.0976656	1.45041:2.50173:0.604478:0.758875:1.21346:1
atpI	BH-AC	MA	0.0173564	0.394294	0.0440188	7.66397e-26	741	50	43.0075	6.99247	0.0976656	1.45041:2.50173:0.604478:0.758875:1.21346:1
atpI	BG-EN	MA	0.0115436	0.264412	0.0436576	3.03769e-20	741	41	36.0664	4.93356	0.0727224	0.820105:0.917943:0.604472:0.607624:0.321842:1
atpI	BS-EN	MA	0.0115436	0.264412	0.0436576	3.03769e-20	741	41	36.0664	4.93356	0.0727224	0.820105:0.917943:0.604472:0.607624:0.321842:1
psaA	BG-VR	MA	0.00887101	0.204343	0.0434125	4.07172e-47	2250	107	93.9954	13.0046	0.0555569	3.64622:3.65666:2.7598:3.22802:1.05608:1
psaA	BS-VR	MA	0.00887101	0.204343	0.0434125	4.07172e-47	2250	107	93.9954	13.0046	0.0555569	3.64622:3.65666:2.7598:3.22802:1.05608:1
rps12	BP-VR	MA	0.00409462	0.0949203	0.0431374	5.0675e-05	369	9	7.88702	1.11298	0.0253589	20.7258:19.3196:22.8457:24.9259:0.01:1
psaA	BP-VR	MA	0.00910269	0.21173	0.0429919	2.40221e-47	2250	107	94.5187	12.4813	0.0588696	3.79224:3.70173:2.81109:3.26942:0.973664:1
rpl36	BP-AC	MA	0.0117302	0.277625	0.0422521	0	111	7	6.20817	0.791831	0.0778945	1.77313:1.76241:1.08155:1.0752:0.237738:1
psbM	BC-AC	MA	0.0111102	0.267177	0.0415837	0	102	6	5.42018	0.579825	0.0827868	12.1135:12.4558:25.6934:25.6065:7.97986:1
psbM	BG-AC	MA	0.0111102	0.267177	0.0415837	0	102	6	5.42018	0.579825	0.0827868	12.1135:12.4558:25.6934:25.6065:7.97986:1
psbM	BH-AC	MA	0.0111102	0.267177	0.0415837	0	102	6	5.42018	0.579825	0.0827868	12.1135:12.4558:25.6934:25.6065:7.97986:1
psbM	BP-AC	MA	0.0111102	0.267177	0.0415837	0	102	6	5.42018	0.579825	0.0827868	12.1135:12.4558:25.6934:25.6065:7.97986:1
psbM	BS-AC	MA	0.0111102	0.267177	0.0415837	0	102	6	5.42018	0.579825	0.0827868	12.1135:12.4558:25.6934:25.6065:7.97986:1
atpI	BG-VR	MA	0.0174396	0.422155	0.0413109	7.00386e-29	741	59	51.8483	7.15165	0.110715	1.14266:1.24043:0.856262:0.918799:0.655515:1
atpI	BS-VR	MA	0.0174396	0.422155	0.0413109	7.00386e-29	741	59	51.8483	7.15165	0.110715	1.14266:1.24043:0.856262:0.918799:0.655515:1
psaB	BC-VR	MA	0.00969699	0.242816	0.0399356	6.03784e-54	2202	114	100.375	13.6247	0.0626916	1.26743:1.68566:0.641627:0.663836:0.464739:1
psaB	BH-VR	MA	0.00969699	0.242816	0.0399356	6.03784e-54	2202	114	100.375	13.6247	0.0626916	1.26743:1.68566:0.641627:0.663836:0.464739:1
rpl23	BP-VR	MA	0.0189853	0.477557	0.039755	1.62317e-15	405	30	26.6287	3.37126	0.128572	8.47846:8.20861:4.253:4.29474:0.0496553:1
rpl16	BP-VR	MA	0.0189853	0.477557	0.039755	1.62317e-15	405	30	26.6287	3.37126	0.128572	8.47846:8.20861:4.253:4.29474:0.0496553:1
psbE	BC-EN	MA	0.00598131	0.150498	0.0397433	9.27394e-05	249	8	6.97553	1.02447	0.03676	15.1719:17.269:23.0578:22.948:4.33762:1
psbE	BG-EN	MA	0.00598131	0.150498	0.0397433	9.27394e-05	249	8	6.97553	1.02447	0.03676	15.1719:17.269:23.0578:22.948:4.33762:1
psbE	BH-EN	MA	0.00598131	0.150498	0.0397433	9.27394e-05	249	8	6.97553	1.02447	0.03676	15.1719:17.269:23.0578:22.948:4.33762:1
psbE	BS-EN	MA	0.00598131	0.150498	0.0397433	9.27394e-05	249	8	6.97553	1.02447	0.03676	15.1719:17.269:23.0578:22.948:4.33762:1
petB	BC-EN	MA	0.00415924	0.105235	0.0395234	1.21084e-08	645	15	13.2983	1.70166	0.0280114	20.1932:15.8362:7.57503:7.57503:1.592:1
petB	BG-EN	MA	0.00415924	0.105235	0.0395234	1.21084e-08	645	15	13.2983	1.70166	0.0280114	20.1932:15.8362:7.57503:7.57503:1.592:1
petB	BH-EN	MA	0.00415924	0.105235	0.0395234	1.21084e-08	645	15	13.2983	1.70166	0.0280114	20.1932:15.8362:7.57503:7.57503:1.592:1
petB	BS-EN	MA	0.00415924	0.105235	0.0395234	1.21084e-08	645	15	13.2983	1.70166	0.0280114	20.1932:15.8362:7.57503:7.57503:1.592:1
psbE	BP-EN	MA	0.00641615	0.165839	0.0386891	3.22749e-05	249	9	7.94415	1.05585	0.0423601	17.4864:15.4518:23.1254:23.0025:3.7619:1
rps12	BG-AC	MA	0.00371043	0.0976641	0.0379918	4.23394e-05	369	9	7.98192	1.01808	0.025273	4.9112:6.18065:3.49773:4.20086:0.01:1
rps12	BS-AC	MA	0.00371043	0.0976641	0.0379918	4.23394e-05	369	9	7.98192	1.01808	0.025273	4.9112:6.18065:3.49773:4.20086:0.01:1
ycf3	BC-VR	MA	0.0137016	0.361606	0.037891	9.13262e-18	501	32	27.6992	4.30085	0.0819473	3.68701:4.29447:3.90347:5.38709:3.15914:1
ycf3	BH-VR	MA	0.0137016	0.361606	0.037891	9.13262e-18	501	32	27.6992	4.30085	0.0819473	3.68701:4.29447:3.90347:5.38709:3.15914:1
petB	BP-EN	MA	0.00408619	0.108286	0.0377351	7.47996e-09	645	15	13.2998	1.70017	0.0278345	10.8831:9.0566:6.45214:6.45214:3.15998:1
psbJ	BC-AC	MA	0.0108725	0.289765	0.0375219	2.69788e-06	120	8	7.19605	0.803951	0.0809902	4.19803:3.36296:3.91669:3.97963:0.200566:1
psbJ	BG-AC	MA	0.0108725	0.289765	0.0375219	2.69788e-06	120	8	7.19605	0.803951	0.0809902	4.19803:3.36296:3.91669:3.97963:0.200566:1
psbJ	BH-AC	MA	0.0108725	0.289765	0.0375219	2.69788e-06	120	8	7.19605	0.803951	0.0809902	4.19803:3.36296:3.91669:3.97963:0.200566:1
psbJ	BS-AC	MA	0.0108725	0.289765	0.0375219	2.69788e-06	120	8	7.19605	0.803951	0.0809902	4.19803:3.36296:3.91669:3.97963:0.200566:1
psaB	BG-VR	MA	0.00915011	0.246074	0.0371844	9.74985e-56	2202	114	101.126	12.8742	0.0627076	1.28125:1.59209:0.735053:0.755888:0.417942:1
psaB	BS-VR	MA	0.00915011	0.246074	0.0371844	9.74985e-56	2202	114	101.126	12.8742	0.0627076	1.28125:1.59209:0.735053:0.755888:0.417942:1
petD	BP-AC	MA	0.0105826	0.294996	0.0358737	2.02544e-15	474	27	24.079	2.92099	0.0754942	9.16569:8.89823:3.68315:3.67058:0.107021:1
psaB	BG-AC	MA	0.00911668	0.259474	0.0351352	9.02154e-56	2202	116	103.927	12.0733	0.0672528	1.3485:3.41926:0.226714:0.285412:1.35952:1
psaB	BS-AC	MA	0.00911668	0.259474	0.0351352	9.02154e-56	2202	116	103.927	12.0733	0.0672528	1.3485:3.41926:0.226714:0.285412:1.35952:1
psaB	BP-VR	MA	0.0088691	0.253664	0.034964	4.03152e-57	2202	115	102.497	12.5026	0.0634047	1.01494:1.41867:0.478966:0.595741:0.368576:1
petD	BC-AC	MA	0.0106392	0.307258	0.0346264	4.63731e-16	474	28	25.0808	2.91919	0.07865	9.4701:9.39157:3.87813:3.86545:0.10604:1
petD	BG-AC	MA	0.0106392	0.307258	0.0346264	4.63731e-16	474	28	25.0808	2.91919	0.07865	9.4701:9.39157:3.87813:3.86545:0.10604:1
petD	BH-AC	MA	0.0106392	0.307258	0.0346264	4.63731e-16	474	28	25.0808	2.91919	0.07865	9.4701:9.39157:3.87813:3.86545:0.10604:1
petD	BS-AC	MA	0.0106392	0.307258	0.0346264	4.63731e-16	474	28	25.0808	2.91919	0.07865	9.4701:9.39157:3.87813:3.86545:0.10604:1
psbC	BC-CE	MA	0.00510338	0.150005	0.0340213	1.64857e-25	1419	53	48.3091	4.69089	0.0426999	2.18657:2.05025:1.48559:1.63021:0.364874:1
psbC	BG-CE	MA	0.00510338	0.150005	0.0340213	1.64857e-25	1419	53	48.3091	4.69089	0.0426999	2.18657:2.05025:1.48559:1.63021:0.364874:1
psbC	BH-CE	MA	0.00510338	0.150005	0.0340213	1.64857e-25	1419	53	48.3091	4.69089	0.0426999	2.18657:2.05025:1.48559:1.63021:0.364874:1
psbC	BS-CE	MA	0.00510338	0.150005	0.0340213	1.64857e-25	1419	53	48.3091	4.69089	0.0426999	2.18657:2.05025:1.48559:1.63021:0.364874:1
psaB	BP-AC	MA	0.00899239	0.270946	0.0331889	1.34864e-59	2202	120	108.244	11.7557	0.0703068	1.19275:3.05371:0.191111:0.223963:1.0468:1
ndhJ	BP-VR	MA	0.0188054	0.576188	0.0326376	1.79981e-25	474	44	39.3681	4.63195	0.139845	3.0456:3.35796:1.94341:1.94341:0.128754:1
psaB	BC-EN	MA	0.00546398	0.16746	0.0326285	3.49654e-40	2202	79	71.0847	7.9153	0.0421756	1.48719:1.56621:1.08576:1.10525:0.230483:1
psaB	BH-EN	MA	0.00546398	0.16746	0.0326285	3.49654e-40	2202	79	71.0847	7.9153	0.0421756	1.48719:1.56621:1.08576:1.10525:0.230483:1
psaB	BC-AC	MA	0.00850886	0.26126	0.0325685	2.36733e-57	2202	116	104.717	11.2831	0.067174	1.38006:3.29449:0.231206:0.293765:1.35497:1
psaB	BH-AC	MA	0.00850886	0.26126	0.0325685	2.36733e-57	2202	116	104.717	11.2831	0.067174	1.38006:3.29449:0.231206:0.293765:1.35497:1
psaA	BC-AC	MA	0.00698313	0.217578	0.0320948	1.4443e-52	2250	107	96.8125	10.1875	0.0562024	1.86704:2.00801:1.29916:1.55993:0.866585:1
psaA	BH-AC	MA	0.00698313	0.217578	0.0320948	1.4443e-52	2250	107	96.8125	10.1875	0.0562024	1.86704:2.00801:1.29916:1.55993:0.866585:1
psaA	BC-CE	MA	0.00530426	0.165357	0.0320776	8.73739e-41	2250	83	74.9243	8.07572	0.0420125	2.33955:3.10377:1.13662:1.51614:1.27051:1
psaA	BH-CE	MA	0.00530426	0.165357	0.0320776	8.73739e-41	2250	83	74.9243	8.07572	0.0420125	2.33955:3.10377:1.13662:1.51614:1.27051:1
psbE	BC-AC	MA	0.00522263	0.163086	0.0320238	7.71648e-07	249	8	7.12393	0.876067	0.0378382	6.03937:11.1306:1.9359:1.9359:0.01:1
psbE	BG-AC	MA	0.00522263	0.163086	0.0320238	7.71648e-07	249	8	7.12393	0.876067	0.0378382	6.03937:11.1306:1.9359:1.9359:0.01:1
psbE	BH-AC	MA	0.00522263	0.163086	0.0320238	7.71648e-07	249	8	7.12393	0.876067	0.0378382	6.03937:11.1306:1.9359:1.9359:0.01:1
psbE	BS-AC	MA	0.00522263	0.163086	0.0320238	7.71648e-07	249	8	7.12393	0.876067	0.0378382	6.03937:11.1306:1.9359:1.9359:0.01:1
psaA	BP-AC	MA	0.00670032	0.213276	0.0314162	3.42107e-49	2250	102	92.9066	9.09342	0.0568949	2.17977:2.26652:1.59933:1.88226:0.697287:1
petG	BC-AC	MA	0.0106485	0.340019	0.0313174	3.19719e-05	111	7	6.39736	0.602642	0.0928275	0.464549:0.487136:0.221641:0.221034:0.176115:1
petG	BG-AC	MA	0.0106485	0.340019	0.0313174	3.19719e-05	111	7	6.39736	0.602642	0.0928275	0.464549:0.487136:0.221641:0.221034:0.176115:1
petG	BH-AC	MA	0.0106485	0.340019	0.0313174	3.19719e-05	111	7	6.39736	0.602642	0.0928275	0.464549:0.487136:0.221641:0.221034:0.176115:1
petG	BP-AC	MA	0.0106485	0.340019	0.0313174	3.19719e-05	111	7	6.39736	0.602642	0.0928275	0.464549:0.487136:0.221641:0.221034:0.176115:1
petG	BS-AC	MA	0.0106485	0.340019	0.0313174	3.19719e-05	111	7	6.39736	0.602642	0.0928275	0.464549:0.487136:0.221641:0.221034:0.176115:1
ndhJ	BC-VR	MA	0.0187129	0.597878	0.0312989	1.5232e-26	474	45	40.3713	4.62868	0.142913	2.42781:2.69069:1.65175:1.65175:0.105361:1
ndhJ	BG-VR	MA	0.0187129	0.597878	0.0312989	1.5232e-26	474	45	40.3713	4.62868	0.142913	2.42781:2.69069:1.65175:1.65175:0.105361:1
ndhJ	BH-VR	MA	0.0187129	0.597878	0.0312989	1.5232e-26	474	45	40.3713	4.62868	0.142913	2.42781:2.69069:1.65175:1.65175:0.105361:1
ndhJ	BS-VR	MA	0.0187129	0.597878	0.0312989	1.5232e-26	474	45	40.3713	4.62868	0.142913	2.42781:2.69069:1.65175:1.65175:0.105361:1
psaA	BG-AC	MA	0.00651636	0.213344	0.0305439	1.51619e-52	2250	104	94.4406	9.5594	0.0544601	2.04063:2.30954:1.30433:1.68207:1.06254:1
psaA	BS-AC	MA	0.00651636	0.213344	0.0305439	1.51619e-52	2250	104	94.4406	9.5594	0.0544601	2.04063:2.30954:1.30433:1.68207:1.06254:1
psaA	BP-CE	MA	0.00477948	0.156672	0.0305064	4.65909e-39	2250	78	71.1687	6.83128	0.0414112	3.18938:3.86238:1.7877:2.17167:0.923061:1
psaA	BG-CE	MA	0.00478738	0.1602	0.0298838	2.8116e-40	2250	80	72.7318	7.26824	0.0405635	2.7303:4.12713:0.985464:1.56011:1.48804:1
psaA	BS-CE	MA	0.00478738	0.1602	0.0298838	2.8116e-40	2250	80	72.7318	7.26824	0.0405635	2.7303:4.12713:0.985464:1.56011:1.48804:1
ycf3	BG-VR	MA	0.0108252	0.370637	0.0292071	7.17461e-19	501	31	27.6148	3.38524	0.080057	3.31663:4.28575:3.3931:5.38071:3.63437:1
ycf3	BP-VR	MA	0.0108252	0.370637	0.0292071	7.17461e-19	501	31	27.6148	3.38524	0.080057	3.31663:4.28575:3.3931:5.38071:3.63437:1
ycf3	BS-VR	MA	0.0108252	0.370637	0.0292071	7.17461e-19	501	31	27.6148	3.38524	0.080057	3.31663:4.28575:3.3931:5.38071:3.63437:1
ndhE	BC-EN	MA	0.00725422	0.249002	0.0291332	5.84505e-09	300	14	12.6115	1.38853	0.0578375	11.1657:10.3686:8.4928:15.8194:1.00196:1
ndhE	BG-EN	MA	0.00725422	0.249002	0.0291332	5.84505e-09	300	14	12.6115	1.38853	0.0578375	11.1657:10.3686:8.4928:15.8194:1.00196:1
ndhE	BH-EN	MA	0.00725422	0.249002	0.0291332	5.84505e-09	300	14	12.6115	1.38853	0.0578375	11.1657:10.3686:8.4928:15.8194:1.00196:1
ndhE	BP-EN	MA	0.00725422	0.249002	0.0291332	5.84505e-09	300	14	12.6115	1.38853	0.0578375	11.1657:10.3686:8.4928:15.8194:1.00196:1
ndhE	BS-EN	MA	0.00725422	0.249002	0.0291332	5.84505e-09	300	14	12.6115	1.38853	0.0578375	11.1657:10.3686:8.4928:15.8194:1.00196:1
psaB	BP-EN	MA	0.00486219	0.169584	0.0286712	3.86646e-40	2202	79	71.9702	7.02985	0.0422412	1.46462:1.54955:1.06422:1.08444:0.229888:1
psaB	BG-EN	MA	0.00485603	0.169829	0.0285936	4.0588e-40	2202	79	71.9928	7.0072	0.0423161	1.47837:1.51868:1.10327:1.12217:0.216765:1
psaB	BS-EN	MA	0.00485603	0.169829	0.0285936	4.0588e-40	2202	79	71.9928	7.0072	0.0423161	1.47837:1.51868:1.10327:1.12217:0.216765:1
psbE	BC-VR	MA	0.00603817	0.212265	0.0284463	1.47462e-08	249	11	10.0374	0.962565	0.053217	11.6953:13.1258:7.54484:7.54484:2.99752:1
psbE	BG-VR	MA	0.00603817	0.212265	0.0284463	1.47462e-08	249	11	10.0374	0.962565	0.053217	11.6953:13.1258:7.54484:7.54484:2.99752:1
psbE	BH-VR	MA	0.00603817	0.212265	0.0284463	1.47462e-08	249	11	10.0374	0.962565	0.053217	11.6953:13.1258:7.54484:7.54484:2.99752:1
psbE	BS-VR	MA	0.00603817	0.212265	0.0284463	1.47462e-08	249	11	10.0374	0.962565	0.053217	11.6953:13.1258:7.54484:7.54484:2.99752:1
psbC	BP-CE	MA	0.00404616	0.157068	0.0257606	1.07815e-27	1419	54	50.3095	3.69048	0.0438169	1.79909:1.59138:1.09481:1.22189:0.324938:1
psaA	BC-EN	MA	0.0039521	0.163486	0.0241739	1.05963e-42	2250	82	75.9729	6.02707	0.0412115	1.67241:1.666:1.24516:1.38415:0.422127:1
psaA	BH-EN	MA	0.0039521	0.163486	0.0241739	1.05963e-42	2250	82	75.9729	6.02707	0.0412115	1.67241:1.666:1.24516:1.38415:0.422127:1
psaC	BC-AC	MA	0.00529031	0.232026	0.0228005	1.76656e-08	243	11	10.2305	0.769489	0.0580339	3.23337:3.14582:1.7586:1.99509:0.449313:1
psaC	BG-AC	MA	0.00529031	0.232026	0.0228005	1.76656e-08	243	11	10.2305	0.769489	0.0580339	3.23337:3.14582:1.7586:1.99509:0.449313:1
psaC	BH-AC	MA	0.00529031	0.232026	0.0228005	1.76656e-08	243	11	10.2305	0.769489	0.0580339	3.23337:3.14582:1.7586:1.99509:0.449313:1
psaC	BS-AC	MA	0.00529031	0.232026	0.0228005	1.76656e-08	243	11	10.2305	0.769489	0.0580339	3.23337:3.14582:1.7586:1.99509:0.449313:1
psbE	BP-VR	MA	0.0060209	0.268978	0.0223843	0	249	13	12.0941	0.905938	0.0665204	19.968:24.9402:20.7561:22.942:0.01:1
psaA	BG-EN	MA	0.00344227	0.157954	0.0217929	2.83052e-42	2250	79	73.7562	5.24381	0.0396924	1.89081:1.93887:1.40447:1.5762:0.414789:1
psaA	BS-EN	MA	0.00344227	0.157954	0.0217929	2.83052e-42	2250	79	73.7562	5.24381	0.0396924	1.89081:1.93887:1.40447:1.5762:0.414789:1
psaA	BP-EN	MA	0.00346853	0.159818	0.021703	9.41777e-42	2250	77	72.0852	4.91478	0.0412203	1.9472:1.89858:1.41646:1.55958:0.331221:1
psbH	BC-EN	MA	0.00539366	0.254066	0.0212294	7.01445e-08	219	9	8.27304	0.726963	0.0537816	0.158589:0.774028:0.150511:0.150511:0.295249:1
psbH	BG-EN	MA	0.00539366	0.254066	0.0212294	7.01445e-08	219	9	8.27304	0.726963	0.0537816	0.158589:0.774028:0.150511:0.150511:0.295249:1
psbH	BH-EN	MA	0.00539366	0.254066	0.0212294	7.01445e-08	219	9	8.27304	0.726963	0.0537816	0.158589:0.774028:0.150511:0.150511:0.295249:1
psbH	BP-EN	MA	0.00539366	0.254066	0.0212294	7.01445e-08	219	9	8.27304	0.726963	0.0537816	0.158589:0.774028:0.150511:0.150511:0.295249:1
psbH	BS-EN	MA	0.00539366	0.254066	0.0212294	7.01445e-08	219	9	8.27304	0.726963	0.0537816	0.158589:0.774028:0.150511:0.150511:0.295249:1
petD	BP-EN	MA	0.00247523	0.116882	0.0211771	6.50152e-09	477	12	11.2259	0.774108	0.0293552	3.51157:3.71183:1.79096:1.79096:0.308028:1
psaC	BP-AC	MA	0.0053844	0.255964	0.0210357	3.82787e-09	243	12	11.2283	0.771662	0.064109	3.49536:3.67217:1.91737:2.1094:0.396529:1
psbC	BC-EN	MA	0.00406619	0.193873	0.0209735	3.31165e-33	1419	63	59.4526	3.54743	0.0534316	1.35707:1.29621:0.960013:0.95818:0.137776:1
psbC	BG-EN	MA	0.00406619	0.193873	0.0209735	3.31165e-33	1419	63	59.4526	3.54743	0.0534316	1.35707:1.29621:0.960013:0.95818:0.137776:1
psbC	BH-EN	MA	0.00406619	0.193873	0.0209735	3.31165e-33	1419	63	59.4526	3.54743	0.0534316	1.35707:1.29621:0.960013:0.95818:0.137776:1
psbC	BS-EN	MA	0.00406619	0.193873	0.0209735	3.31165e-33	1419	63	59.4526	3.54743	0.0534316	1.35707:1.29621:0.960013:0.95818:0.137776:1
psbE	BP-AC	MA	0.00526083	0.257051	0.0204661	3.80019e-09	249	11	10.1896	0.810399	0.0567935	8.18347:17.1008:2.30547:2.30547:0.01:1
petB	BC-VR	MA	0.00602379	0.302257	0.0199293	4.09656e-20	645	35	32.8753	2.12467	0.0758429	3.21068:2.41019:1.47743:1.61357:0.885773:1
petB	BG-VR	MA	0.00602379	0.302257	0.0199293	4.09656e-20	645	35	32.8753	2.12467	0.0758429	3.21068:2.41019:1.47743:1.61357:0.885773:1
petB	BH-VR	MA	0.00602379	0.302257	0.0199293	4.09656e-20	645	35	32.8753	2.12467	0.0758429	3.21068:2.41019:1.47743:1.61357:0.885773:1
petB	BS-VR	MA	0.00602379	0.302257	0.0199293	4.09656e-20	645	35	32.8753	2.12467	0.0758429	3.21068:2.41019:1.47743:1.61357:0.885773:1
petD	BC-EN	MA	0.00251272	0.126302	0.0198945	4.10692e-09	477	13	12.2145	0.785505	0.03176	3.8314:4.28548:1.92766:1.92766:0.313563:1
petD	BG-EN	MA	0.00251272	0.126302	0.0198945	4.10692e-09	477	13	12.2145	0.785505	0.03176	3.8314:4.28548:1.92766:1.92766:0.313563:1
petD	BH-EN	MA	0.00251272	0.126302	0.0198945	4.10692e-09	477	13	12.2145	0.785505	0.03176	3.8314:4.28548:1.92766:1.92766:0.313563:1
petD	BS-EN	MA	0.00251272	0.126302	0.0198945	4.10692e-09	477	13	12.2145	0.785505	0.03176	3.8314:4.28548:1.92766:1.92766:0.313563:1
petB	BP-VR	MA	0.00594869	0.30335	0.01961	2.37012e-20	645	35	32.8685	2.1315	0.0750002	2.76044:2.15029:1.38731:1.51953:0.969727:1
psaC	BC-VR	MA	0.00540514	0.278117	0.0194348	7.02899e-10	243	13	12.2201	0.779929	0.0690635	3.8119:4.46709:1.91477:1.90284:0.145537:1
psaC	BG-VR	MA	0.00540514	0.278117	0.0194348	7.02899e-10	243	13	12.2201	0.779929	0.0690635	3.8119:4.46709:1.91477:1.90284:0.145537:1
psaC	BH-VR	MA	0.00540514	0.278117	0.0194348	7.02899e-10	243	13	12.2201	0.779929	0.0690635	3.8119:4.46709:1.91477:1.90284:0.145537:1
psaC	BS-VR	MA	0.00540514	0.278117	0.0194348	7.02899e-10	243	13	12.2201	0.779929	0.0690635	3.8119:4.46709:1.91477:1.90284:0.145537:1
psbD	BG-EN	MA	0.00262154	0.141828	0.0184839	3.57805e-19	1059	33	31.2743	1.72574	0.0375512	3.95502:4.47319:3.02159:3.76223:1.52182:1
psbD	BS-EN	MA	0.00262154	0.141828	0.0184839	3.57805e-19	1059	33	31.2743	1.72574	0.0375512	3.95502:4.47319:3.02159:3.76223:1.52182:1
psbC	BC-VR	MA	0.00478845	0.260549	0.0183783	2.64838e-42	1419	79	74.9584	4.0416	0.0698049	1.22016:1.1274:0.822495:0.837046:0.329586:1
psbC	BG-VR	MA	0.00478845	0.260549	0.0183783	2.64838e-42	1419	79	74.9584	4.0416	0.0698049	1.22016:1.1274:0.822495:0.837046:0.329586:1
psbC	BH-VR	MA	0.00478845	0.260549	0.0183783	2.64838e-42	1419	79	74.9584	4.0416	0.0698049	1.22016:1.1274:0.822495:0.837046:0.329586:1
psbC	BS-VR	MA	0.00478845	0.260549	0.0183783	2.64838e-42	1419	79	74.9584	4.0416	0.0698049	1.22016:1.1274:0.822495:0.837046:0.329586:1
psbD	BC-EN	MA	0.00262752	0.14609	0.0179856	9.78423e-20	1059	34	32.2771	1.72292	0.0387836	4.1532:4.55839:3.22359:3.9091:1.424:1
psbD	BH-EN	MA	0.00262752	0.14609	0.0179856	9.78423e-20	1059	34	32.2771	1.72292	0.0387836	4.1532:4.55839:3.22359:3.9091:1.424:1
psaC	BP-VR	MA	0.00545831	0.307016	0.0177786	1.32576e-10	243	14	13.2272	0.772764	0.0758154	4.01588:5.24742:1.94007:1.92493:0.132168:1
psbA	BP-CE	MA	0.002836	0.160123	0.0177114	1.4022e-21	1059	36	34.1183	1.88172	0.0410684	15.403:17.6481:10.0685:10.0685:2.30963:1
psbC	BP-AC	MA	0.00485037	0.275	0.0176377	1.95285e-45	1419	83	78.844	4.15601	0.0725811	1.19528:1.34804:0.822233:0.813078:0.293731:1
psbA	BG-CE	MA	0.00282648	0.160961	0.01756	1.17164e-21	1059	36	34.1222	1.87777	0.04108	15.3743:17.5618:10.0299:10.0299:2.27429:1
psbA	BS-CE	MA	0.00282648	0.160961	0.01756	1.17164e-21	1059	36	34.1222	1.87777	0.04108	15.3743:17.5618:10.0299:10.0299:2.27429:1
psbD	BG-VR	MA	0.00282911	0.167224	0.0169181	5.55397e-23	1059	40	38.1615	1.83852	0.0455548	5.17482:4.26093:2.89774:2.89774:2.06205:1
psbD	BS-VR	MA	0.00282911	0.167224	0.0169181	5.55397e-23	1059	40	38.1615	1.83852	0.0455548	5.17482:4.26093:2.89774:2.89774:2.06205:1
psaC	BC-CE	MA	0.00566429	0.335975	0.0168593	2.52588e-11	243	15	14.2138	0.786174	0.0828268	5.86243:7.05817:2.92632:2.92632:0.01:1
psaC	BG-CE	MA	0.00566429	0.335975	0.0168593	2.52588e-11	243	15	14.2138	0.786174	0.0828268	5.86243:7.05817:2.92632:2.92632:0.01:1
psaC	BH-CE	MA	0.00566429	0.335975	0.0168593	2.52588e-11	243	15	14.2138	0.786174	0.0828268	5.86243:7.05817:2.92632:2.92632:0.01:1
psaC	BS-CE	MA	0.00566429	0.335975	0.0168593	2.52588e-11	243	15	14.2138	0.786174	0.0828268	5.86243:7.05817:2.92632:2.92632:0.01:1
petD	BP-VR	MA	0.00540917	0.322669	0.0167638	4.96599e-17	474	28	26.6159	1.38407	0.0827515	8.3318:8.23357:3.22146:3.21508:0.0825138:1
psbA	BC-CE	MA	0.00284134	0.171603	0.0165576	6.37686e-23	1059	38	36.1315	1.86848	0.0437707	16.2184:17.8137:10.6411:10.6411:2.06799:1
psbA	BH-CE	MA	0.00284134	0.171603	0.0165576	6.37686e-23	1059	38	36.1315	1.86848	0.0437707	16.2184:17.8137:10.6411:10.6411:2.06799:1
psbD	BC-VR	MA	0.00284189	0.172383	0.0164859	1.32616e-23	1059	41	39.1614	1.83863	0.0469027	5.38308:4.28932:2.8275:2.8275:2.21664:1
psbD	BH-VR	MA	0.00284189	0.172383	0.0164859	1.32616e-23	1059	41	39.1614	1.83863	0.0469027	5.38308:4.28932:2.8275:2.8275:2.21664:1
petD	BC-VR	MA	0.00544541	0.334034	0.016302	1.17368e-17	474	29	27.6118	1.38818	0.0859036	8.58093:8.66718:3.34575:3.33919:0.0798803:1
petD	BG-VR	MA	0.00544541	0.334034	0.016302	1.17368e-17	474	29	27.6118	1.38818	0.0859036	8.58093:8.66718:3.34575:3.33919:0.0798803:1
petD	BH-VR	MA	0.00544541	0.334034	0.016302	1.17368e-17	474	29	27.6118	1.38818	0.0859036	8.58093:8.66718:3.34575:3.33919:0.0798803:1
petD	BS-VR	MA	0.00544541	0.334034	0.016302	1.17368e-17	474	29	27.6118	1.38818	0.0859036	8.58093:8.66718:3.34575:3.33919:0.0798803:1
psaC	BP-CE	MA	0.00569473	0.367834	0.0154818	4.76735e-12	243	16	15.2282	0.77184	0.0904284	6.13651:8.12996:2.91097:2.91097:0.01:1
psbC	BP-EN	MA	0.0030379	0.20235	0.0150131	1.07953e-35	1419	64	61.3766	2.62344	0.0548467	1.15902:1.05691:0.760231:0.759289:0.125553:1
psbC	BC-AC	MA	0.00385774	0.267312	0.0144316	1.58469e-45	1419	80	76.6689	3.3311	0.0695471	1.21941:1.37606:0.842764:0.83439:0.352946:1
psbC	BG-AC	MA	0.00385774	0.267312	0.0144316	1.58469e-45	1419	80	76.6689	3.3311	0.0695471	1.21941:1.37606:0.842764:0.83439:0.352946:1
psbC	BH-AC	MA	0.00385774	0.267312	0.0144316	1.58469e-45	1419	80	76.6689	3.3311	0.0695471	1.21941:1.37606:0.842764:0.83439:0.352946:1
psbC	BS-AC	MA	0.00385774	0.267312	0.0144316	1.58469e-45	1419	80	76.6689	3.3311	0.0695471	1.21941:1.37606:0.842764:0.83439:0.352946:1
psbC	BP-VR	MA	0.00378993	0.267929	0.0141453	1.50912e-44	1419	80	76.841	3.159	0.071408	1.14731:0.991731:0.672799:0.692422:0.327459:1
psbA	BG-VR	MA	0.00275418	0.213256	0.0129149	2.39186e-27	1059	45	43.2767	1.72328	0.0543065	5.80806:5.57576:3.55386:3.54711:1.13632:1
psbA	BS-VR	MA	0.00275418	0.213256	0.0129149	2.39186e-27	1059	45	43.2767	1.72328	0.0543065	5.80806:5.57576:3.55386:3.54711:1.13632:1
psbA	BP-VR	MA	0.00278331	0.222754	0.012495	1.87369e-28	1059	47	45.2792	1.72083	0.0572099	6.16155:5.81544:3.7155:3.7086:1.18044:1
psbA	BC-VR	MA	0.00275989	0.225622	0.0122324	1.13614e-28	1059	47	45.2922	1.70784	0.0573486	6.06902:5.70125:3.6188:3.61263:1.13168:1
psbA	BH-VR	MA	0.00275989	0.225622	0.0122324	1.13614e-28	1059	47	45.2922	1.70784	0.0573486	6.06902:5.70125:3.6188:3.61263:1.13168:1
psbA	BP-EN	MA	0.0023208	0.191027	0.0121491	2.59653e-23	1059	37	35.5369	1.46313	0.0453167	1.80514:1.97125:1.29331:1.55526:0.718982:1
psbA	BG-EN	MA	0.00231144	0.192406	0.0120133	2.09463e-23	1059	37	35.5425	1.45747	0.0453836	1.78695:1.94614:1.28262:1.54717:0.697471:1
psbA	BS-EN	MA	0.00231144	0.192406	0.0120133	2.09463e-23	1059	37	35.5425	1.45747	0.0453836	1.78695:1.94614:1.28262:1.54717:0.697471:1
psbA	BC-EN	MA	0.00232638	0.203052	0.011457	1.09444e-24	1059	39	37.5421	1.45787	0.0480556	1.92614:2.02142:1.4089:1.66021:0.644778:1
psbA	BH-EN	MA	0.00232638	0.203052	0.011457	1.09444e-24	1059	39	37.5421	1.45787	0.0480556	1.92614:2.02142:1.4089:1.66021:0.644778:1
psbA	BP-AC	MA	0.0027405	0.244357	0.0112151	1.90458e-30	1059	49	47.3221	1.67791	0.0607999	5.64801:5.19823:3.66195:3.65445:1.55414:1
psbA	BG-AC	MA	0.00273058	0.245846	0.0111069	1.44351e-30	1059	49	47.3266	1.67338	0.0608442	5.54409:5.0867:3.56665:3.55974:1.51434:1
psbA	BS-AC	MA	0.00273058	0.245846	0.0111069	1.44351e-30	1059	49	47.3266	1.67338	0.0608442	5.54409:5.0867:3.56665:3.55974:1.51434:1
psbA	BC-AC	MA	0.00272022	0.247567	0.0109878	1.07835e-30	1059	49	47.3323	1.66769	0.0609253	5.49049:5.02097:3.50868:3.50216:1.49336:1
psbA	BH-AC	MA	0.00272022	0.247567	0.0109878	1.07835e-30	1059	49	47.3323	1.66769	0.0609253	5.49049:5.02097:3.50868:3.50216:1.49336:1
psbD	BP-EN	MA	0.0012432	0.148885	0.00835005	2.01355e-21	1059	32	31.1934	0.806582	0.0372825	3.63021:4.48758:2.58856:3.69209:2.17705:1
psbD	BG-CE	MA	0.00148982	0.180129	0.00827087	1.44621e-26	1059	43	42.0667	0.933341	0.0499992	6.96765:6.35007:4.22472:4.22472:1.09716:1
psbD	BS-CE	MA	0.00148982	0.180129	0.00827087	1.44621e-26	1059	43	42.0667	0.933341	0.0499992	6.96765:6.35007:4.22472:4.22472:1.09716:1
psbD	BC-CE	MA	0.00149131	0.18534	0.00804634	3.53528e-27	1059	44	43.0707	0.929264	0.0514315	7.2239:6.46244:4.23238:4.23238:1.15768:1
psbD	BH-CE	MA	0.00149131	0.18534	0.00804634	3.53528e-27	1059	44	43.0707	0.929264	0.0514315	7.2239:6.46244:4.23238:4.23238:1.15768:1
psbD	BP-VR	MA	0.00135638	0.169913	0.00798278	4.59253e-25	1059	39	38.123	0.876986	0.0447796	5.0546:4.37117:3.12476:3.12476:2.21836:1
psbD	BG-AC	MA	0.00135818	0.20075	0.00676553	1.27476e-28	1059	47	46.1618	0.838153	0.0554859	2.44654:1.35164:0.614384:0.614384:0.92446:1
psbD	BS-AC	MA	0.00135818	0.20075	0.00676553	1.27476e-28	1059	47	46.1618	0.838153	0.0554859	2.44654:1.35164:0.614384:0.614384:0.92446:1
psbD	BC-AC	MA	0.00136108	0.205253	0.00663121	1.43867e-29	1059	48	47.1662	0.833785	0.0569808	2.5608:1.32275:0.545366:0.545366:0.973155:1
psbD	BH-AC	MA	0.00136108	0.205253	0.00663121	1.43867e-29	1059	48	47.1662	0.833785	0.0569808	2.5608:1.32275:0.545366:0.545366:0.973155:1
psbN	BC-EN	MA	8.41873e-05	0.0841873	0.001	0.00862093	129	3	2.99274	0.00726468	0.0246224	30:17.0362:17.3269:17.3269:0.01:1
psbN	BC-VR	MA	0.000152944	0.152944	0.001	0.000613999	129	5	4.98777	0.0122305	0.0444132	30:27.3009:23.0559:23.0559:0.01:1
psbN	BG-EN	MA	8.41873e-05	0.0841873	0.001	0.00862093	129	3	2.99274	0.00726468	0.0246224	30:17.0362:17.3269:17.3269:0.01:1
psbN	BG-VR	MA	0.000152944	0.152944	0.001	0.000613999	129	5	4.98777	0.0122305	0.0444132	30:27.3009:23.0559:23.0559:0.01:1
psbN	BH-EN	MA	8.41873e-05	0.0841873	0.001	0.00862093	129	3	2.99274	0.00726468	0.0246224	30:17.0362:17.3269:17.3269:0.01:1
psbN	BH-VR	MA	0.000152944	0.152944	0.001	0.000613999	129	5	4.98777	0.0122305	0.0444132	30:27.3009:23.0559:23.0559:0.01:1
psbN	BP-EN	MA	8.41873e-05	0.0841873	0.001	0.00862093	129	3	2.99274	0.00726468	0.0246224	30:17.0362:17.3269:17.3269:0.01:1
psbN	BP-VR	MA	0.000152944	0.152944	0.001	0.000613999	129	5	4.98777	0.0122305	0.0444132	30:27.3009:23.0559:23.0559:0.01:1
psbN	BS-EN	MA	8.41873e-05	0.0841873	0.001	0.00862093	129	3	2.99274	0.00726468	0.0246224	30:17.0362:17.3269:17.3269:0.01:1
psbN	BS-VR	MA	0.000152944	0.152944	0.001	0.000613999	129	5	4.98777	0.0122305	0.0444132	30:27.3009:23.0559:23.0559:0.01:1
psbM	BC-CE	MA	0.000246684	0.246684	0.001	0.00117381	102	3	2.98383	0.0161685	0.0386402	0.85586:0.591393:0.238093:1.45169:5.46279:1
psbM	BC-EN	MA	4.4201e-05	0.044201	0.001	0.0949895	102	1	0.997135	0.00286461	0.0114459	30:22.7558:23.1352:23.1352:0.01:1
psbM	BG-CE	MA	0.000246684	0.246684	0.001	0.00117381	102	3	2.98383	0.0161685	0.0386402	0.85586:0.591393:0.238093:1.45169:5.46279:1
psbM	BG-EN	MA	4.4201e-05	0.044201	0.001	0.0949895	102	1	0.997135	0.00286461	0.0114459	30:22.7558:23.1352:23.1352:0.01:1
psbM	BH-CE	MA	0.000246684	0.246684	0.001	0.00117381	102	3	2.98383	0.0161685	0.0386402	0.85586:0.591393:0.238093:1.45169:5.46279:1
psbM	BH-EN	MA	4.4201e-05	0.044201	0.001	0.0949895	102	1	0.997135	0.00286461	0.0114459	30:22.7558:23.1352:23.1352:0.01:1
psbM	BP-CE	MA	0.000246684	0.246684	0.001	0.00117381	102	3	2.98383	0.0161685	0.0386402	0.85586:0.591393:0.238093:1.45169:5.46279:1
psbM	BP-EN	MA	4.4201e-05	0.044201	0.001	0.0949895	102	1	0.997135	0.00286461	0.0114459	30:22.7558:23.1352:23.1352:0.01:1
psbM	BS-CE	MA	0.000246684	0.246684	0.001	0.00117381	102	3	2.98383	0.0161685	0.0386402	0.85586:0.591393:0.238093:1.45169:5.46279:1
psbM	BS-EN	MA	4.4201e-05	0.044201	0.001	0.0949895	102	1	0.997135	0.00286461	0.0114459	30:22.7558:23.1352:23.1352:0.01:1
psbL	BC-CE	MA	0.000111326	0.111326	0.001	0.00553367	114	3	2.99119	0.00880575	0.0283106	27.2348:29.9995:23.361:23.361:0.01:1
psbL	BC-EN	MA	0.000138684	0.138684	0.001	0	114	2	1.98888	0.0111246	0.0211513	1.06939:7.16812:11.9666:16.3462:0.01:1
psbL	BG-CE	MA	0.000111326	0.111326	0.001	0.00553367	114	3	2.99119	0.00880575	0.0283106	27.2348:29.9995:23.361:23.361:0.01:1
psbL	BG-EN	MA	0.000138684	0.138684	0.001	0	114	2	1.98888	0.0111246	0.0211513	1.06939:7.16812:11.9666:16.3462:0.01:1
psbL	BH-CE	MA	0.000111326	0.111326	0.001	0.00553367	114	3	2.99119	0.00880575	0.0283106	27.2348:29.9995:23.361:23.361:0.01:1
psbL	BH-EN	MA	0.000138684	0.138684	0.001	0	114	2	1.98888	0.0111246	0.0211513	1.06939:7.16812:11.9666:16.3462:0.01:1
psbL	BP-CE	MA	0.000111326	0.111326	0.001	0.00553367	114	3	2.99119	0.00880575	0.0283106	27.2348:29.9995:23.361:23.361:0.01:1
psbL	BP-EN	MA	0.000138684	0.138684	0.001	0	114	2	1.98888	0.0111246	0.0211513	1.06939:7.16812:11.9666:16.3462:0.01:1
psbL	BS-CE	MA	0.000111326	0.111326	0.001	0.00553367	114	3	2.99119	0.00880575	0.0283106	27.2348:29.9995:23.361:23.361:0.01:1
psbL	BS-EN	MA	0.000138684	0.138684	0.001	0	114	2	1.98888	0.0111246	0.0211513	1.06939:7.16812:11.9666:16.3462:0.01:1
psbJ	BC-CE	MA	0.000143671	0.143671	0.001	0.00308537	120	4	3.98774	0.0122614	0.0353671	1.4211:1.84338:0.749302:1.11864:0.01:1
psbJ	BG-CE	MA	0.000143671	0.143671	0.001	0.00308537	120	4	3.98774	0.0122614	0.0353671	1.4211:1.84338:0.749302:1.11864:0.01:1
psbJ	BH-CE	MA	0.000143671	0.143671	0.001	0.00308537	120	4	3.98774	0.0122614	0.0353671	1.4211:1.84338:0.749302:1.11864:0.01:1
psbJ	BP-CE	MA	0.000104735	0.104735	0.001	0.00566145	120	3	2.99126	0.00873524	0.0267943	2.45834:3.39826:0.965585:0.965585:0.01:1
psbJ	BS-CE	MA	0.000143671	0.143671	0.001	0.00308537	120	4	3.98774	0.0122614	0.0353671	1.4211:1.84338:0.749302:1.11864:0.01:1
psbF	BC-AC	MA	0.000180517	0.180517	0.001	0.00204071	117	4	3.98986	0.0101391	0.0511055	30:5.68578:5.43332:5.43332:0.01:1
psbF	BC-CE	MA	0.000232512	0.232512	0.001	0.00159627	117	5	4.9877	0.012304	0.0672323	30:3.44583:3.21522:3.21522:0.01:1
psbF	BC-VR	MA	0.000180517	0.180517	0.001	0.00204071	117	4	3.98986	0.0101391	0.0511055	30:5.68578:5.43332:5.43332:0.01:1
psbF	BG-AC	MA	0.000180517	0.180517	0.001	0.00204071	117	4	3.98986	0.0101391	0.0511055	30:5.68578:5.43332:5.43332:0.01:1
psbF	BG-CE	MA	0.000232512	0.232512	0.001	0.00159627	117	5	4.9877	0.012304	0.0672323	30:3.44583:3.21522:3.21522:0.01:1
psbF	BH-AC	MA	0.000180517	0.180517	0.001	0.00204071	117	4	3.98986	0.0101391	0.0511055	30:5.68578:5.43332:5.43332:0.01:1
psbF	BH-CE	MA	0.000232512	0.232512	0.001	0.00159627	117	5	4.9877	0.012304	0.0672323	30:3.44583:3.21522:3.21522:0.01:1
psbF	BH-VR	MA	0.000180517	0.180517	0.001	0.00204071	117	4	3.98986	0.0101391	0.0511055	30:5.68578:5.43332:5.43332:0.01:1
psbF	BP-AC	MA	0.000115803	0.115803	0.001	0.00890321	117	3	2.99286	0.00713845	0.0342907	30:10.2499:10.1883:10.1883:0.01:1
psbF	BP-CE	MA	0.000161965	0.161965	0.001	0.00261962	117	4	3.99068	0.00932342	0.0486596	30:6.66321:6.50802:6.50802:0.01:1
psbF	BP-VR	MA	0.000115803	0.115803	0.001	0.00890321	117	3	2.99286	0.00713845	0.0342907	30:10.2499:10.1883:10.1883:0.01:1
psbF	BS-AC	MA	0.000180517	0.180517	0.001	0.00204071	117	4	3.98986	0.0101391	0.0511055	30:5.68578:5.43332:5.43332:0.01:1
psbF	BS-CE	MA	0.000232512	0.232512	0.001	0.00159627	117	5	4.9877	0.012304	0.0672323	30:3.44583:3.21522:3.21522:0.01:1
psbF	BS-VR	MA	0.000180517	0.180517	0.001	0.00204071	117	4	3.98986	0.0101391	0.0511055	30:5.68578:5.43332:5.43332:0.01:1
psbD	BP-AC	MA	0.000206337	0.206337	0.001	3.94311e-29	1059	46	45.8714	0.128615	0.0543968	1.99675:1.21489:0.629972:0.629972:1.00649:1
psbD	BP-CE	MA	0.000182735	0.182735	0.001	2.68997e-26	1059	42	41.8849	0.115106	0.0488875	5.70435:5.34093:3.85062:3.85062:1.35786:1
psaC	BC-EN	MA	0.000242262	0.242262	0.001	3.52384e-08	243	12	11.9654	0.0346086	0.0624199	4.50298:3.94311:2.02424:2.02424:0.01:1
psaC	BG-EN	MA	0.000242262	0.242262	0.001	3.52384e-08	243	12	11.9654	0.0346086	0.0624199	4.50298:3.94311:2.02424:2.02424:0.01:1
psaC	BH-EN	MA	0.000242262	0.242262	0.001	3.52384e-08	243	12	11.9654	0.0346086	0.0624199	4.50298:3.94311:2.02424:2.02424:0.01:1
psaC	BP-EN	MA	0.000267846	0.267846	0.001	2.55625e-09	243	13	12.9622	0.0378482	0.0685294	4.85697:4.64701:2.3642:2.3642:0.01:1
psaC	BS-EN	MA	0.000242262	0.242262	0.001	3.52384e-08	243	12	11.9654	0.0346086	0.0624199	4.50298:3.94311:2.02424:2.02424:0.01:1
petN	BC-CE	MA	0.000118774	0.118774	0.001	0.0136377	87	3	2.99422	0.00578092	0.0406057	7.96633:5.00879:18.2738:18.683:3.88068:1
petN	BC-EN	MA	0.000110989	0.110989	0.001	0.0212052	87	2	1.99384	0.00616027	0.0272228	2.02972:1.31303:1.12606:1.12606:6.28893:1
petN	BC-VR	MA	0.000115602	0.115602	0.001	0.0138388	87	3	2.99426	0.00573975	0.0397075	1.16654:0.741093:0.831417:0.823629:0.56912:1
petN	BG-CE	MA	0.000118774	0.118774	0.001	0.0136377	87	3	2.99422	0.00578092	0.0406057	7.96633:5.00879:18.2738:18.683:3.88068:1
petN	BG-EN	MA	0.000110989	0.110989	0.001	0.0212052	87	2	1.99384	0.00616027	0.0272228	2.02972:1.31303:1.12606:1.12606:6.28893:1
petN	BG-VR	MA	0.000115602	0.115602	0.001	0.0138388	87	3	2.99426	0.00573975	0.0397075	1.16654:0.741093:0.831417:0.823629:0.56912:1
petN	BH-CE	MA	0.000118774	0.118774	0.001	0.0136377	87	3	2.99422	0.00578092	0.0406057	7.96633:5.00879:18.2738:18.683:3.88068:1
petN	BH-EN	MA	0.000110989	0.110989	0.001	0.0212052	87	2	1.99384	0.00616027	0.0272228	2.02972:1.31303:1.12606:1.12606:6.28893:1
petN	BH-VR	MA	0.000115602	0.115602	0.001	0.0138388	87	3	2.99426	0.00573975	0.0397075	1.16654:0.741093:0.831417:0.823629:0.56912:1
petN	BP-CE	MA	0.000118774	0.118774	0.001	0.0136377	87	3	2.99422	0.00578092	0.0406057	7.96633:5.00879:18.2738:18.683:3.88068:1
petN	BP-EN	MA	0.000110989	0.110989	0.001	0.0212052	87	2	1.99384	0.00616027	0.0272228	2.02972:1.31303:1.12606:1.12606:6.28893:1
petN	BP-VR	MA	0.000115602	0.115602	0.001	0.0138388	87	3	2.99426	0.00573975	0.0397075	1.16654:0.741093:0.831417:0.823629:0.56912:1
petN	BS-CE	MA	0.000118774	0.118774	0.001	0.0136377	87	3	2.99422	0.00578092	0.0406057	7.96633:5.00879:18.2738:18.683:3.88068:1
petN	BS-EN	MA	0.000110989	0.110989	0.001	0.0212052	87	2	1.99384	0.00616027	0.0272228	2.02972:1.31303:1.12606:1.12606:6.28893:1
petN	BS-VR	MA	0.000115602	0.115602	0.001	0.0138388	87	3	2.99426	0.00573975	0.0397075	1.16654:0.741093:0.831417:0.823629:0.56912:1
petG	BC-EN	MA	0.000693572	0.693572	0.001	0.000137081	111	4	3.97762	0.0223754	0.105274	0.0733791:0.0504919:0.0391505:0.0391505:2.28039:1
petG	BC-VR	MA	0.000693572	0.693572	0.001	0.000137081	111	4	3.97762	0.0223754	0.105274	0.0733791:0.0504919:0.0391505:0.0391505:2.28039:1
petG	BG-EN	MA	0.000693572	0.693572	0.001	0.000137081	111	4	3.97762	0.0223754	0.105274	0.0733791:0.0504919:0.0391505:0.0391505:2.28039:1
petG	BG-VR	MA	0.000693572	0.693572	0.001	0.000137081	111	4	3.97762	0.0223754	0.105274	0.0733791:0.0504919:0.0391505:0.0391505:2.28039:1
petG	BH-EN	MA	0.000693572	0.693572	0.001	0.000137081	111	4	3.97762	0.0223754	0.105274	0.0733791:0.0504919:0.0391505:0.0391505:2.28039:1
petG	BH-VR	MA	0.000693572	0.693572	0.001	0.000137081	111	4	3.97762	0.0223754	0.105274	0.0733791:0.0504919:0.0391505:0.0391505:2.28039:1
petG	BP-EN	MA	0.000693572	0.693572	0.001	0.000137081	111	4	3.97762	0.0223754	0.105274	0.0733791:0.0504919:0.0391505:0.0391505:2.28039:1
petG	BP-VR	MA	0.000693572	0.693572	0.001	0.000137081	111	4	3.97762	0.0223754	0.105274	0.0733791:0.0504919:0.0391505:0.0391505:2.28039:1
petG	BS-EN	MA	0.000693572	0.693572	0.001	0.000137081	111	4	3.97762	0.0223754	0.105274	0.0733791:0.0504919:0.0391505:0.0391505:2.28039:1
petG	BS-VR	MA	0.000693572	0.693572	0.001	0.000137081	111	4	3.97762	0.0223754	0.105274	0.0733791:0.0504919:0.0391505:0.0391505:2.28039:1
atpH	BC-AC	MA	0.00029682	0.29682	0.001	6.3266e-10	243	15	14.962	0.0380342	0.0840118	6.16131:6.10692:2.88512:2.88512:0.0655836:1
atpH	BC-CE	MA	0.000102361	0.102361	0.001	0.000376692	243	6	5.98433	0.0156707	0.0283615	7.03044:8.33745:2.78163:2.78163:0.01:1
atpH	BC-EN	MA	0.000183044	0.183044	0.001	0	243	10	9.97359	0.0264067	0.050314	6.98671:4.82018:2.23168:2.23168:0.169573:1
atpH	BC-VR	MA	0.000195956	0.195956	0.001	2.57711e-07	243	11	10.9733	0.0267448	0.0571482	5.93617:6.32478:4.46525:4.61047:0.122324:1
atpH	BG-AC	MA	0.00029682	0.29682	0.001	6.3266e-10	243	15	14.962	0.0380342	0.0840118	6.16131:6.10692:2.88512:2.88512:0.0655836:1
atpH	BG-CE	MA	0.000102361	0.102361	0.001	0.000376692	243	6	5.98433	0.0156707	0.0283615	7.03044:8.33745:2.78163:2.78163:0.01:1
atpH	BG-EN	MA	0.000183044	0.183044	0.001	0	243	10	9.97359	0.0264067	0.050314	6.98671:4.82018:2.23168:2.23168:0.169573:1
atpH	BG-VR	MA	0.000195956	0.195956	0.001	2.57711e-07	243	11	10.9733	0.0267448	0.0571482	5.93617:6.32478:4.46525:4.61047:0.122324:1
atpH	BH-AC	MA	0.00029682	0.29682	0.001	6.3266e-10	243	15	14.962	0.0380342	0.0840118	6.16131:6.10692:2.88512:2.88512:0.0655836:1
atpH	BH-CE	MA	0.000102361	0.102361	0.001	0.000376692	243	6	5.98433	0.0156707	0.0283615	7.03044:8.33745:2.78163:2.78163:0.01:1
atpH	BH-EN	MA	0.000183044	0.183044	0.001	0	243	10	9.97359	0.0264067	0.050314	6.98671:4.82018:2.23168:2.23168:0.169573:1
atpH	BH-VR	MA	0.000195956	0.195956	0.001	2.57711e-07	243	11	10.9733	0.0267448	0.0571482	5.93617:6.32478:4.46525:4.61047:0.122324:1
atpH	BP-AC	MA	0.00027891	0.27891	0.001	8.86309e-10	243	15	14.963	0.0369819	0.0805402	3.36807:3.5045:1.95587:1.95587:0.12887:1
atpH	BP-CE	MA	0.000136296	0.136296	0.001	1.06071e-05	243	8	7.97962	0.0203815	0.0384458	4.22542:4.37213:2.07627:2.07627:0.0903192:1
atpH	BP-EN	MA	0.000173366	0.173366	0.001	6.99349e-07	243	10	9.97456	0.025439	0.0489547	3.15099:2.4673:1.43516:1.43516:0.280847:1
atpH	BP-VR	MA	0.000192924	0.192924	0.001	6.38609e-07	243	11	10.973	0.0270394	0.0558283	3.3138:3.92573:2.04155:2.13554:0.222263:1
atpH	BS-AC	MA	0.00029682	0.29682	0.001	6.3266e-10	243	15	14.962	0.0380342	0.0840118	6.16131:6.10692:2.88512:2.88512:0.0655836:1
atpH	BS-CE	MA	0.000102361	0.102361	0.001	0.000376692	243	6	5.98433	0.0156707	0.0283615	7.03044:8.33745:2.78163:2.78163:0.01:1
atpH	BS-EN	MA	0.000183044	0.183044	0.001	0	243	10	9.97359	0.0264067	0.050314	6.98671:4.82018:2.23168:2.23168:0.169573:1
atpH	BS-VR	MA	0.000195956	0.195956	0.001	2.57711e-07	243	11	10.9733	0.0267448	0.0571482	5.93617:6.32478:4.46525:4.61047:0.122324:1
